# Supplementary material for: Vigorously stirred La2O3 suspensions for Michael additions in water
Source: Royal Society of Chemistry journal article supplement (doi:10.1039/d4cc02343a), 2024-01-01

# ***Vigorously Stirred La<sub>2</sub>O<sub>3</sub> Suspensions for Michael Additions in Water***

*Tomoya Hisada, Rina Osada, Taku Kitano, \* Yasuhiro Yamashita, Shū Kobayashi\**

*Department of Chemistry, School of Sciences, The University of Tokyo,  
Hongo, Bunkyo-ku, Tokyo, Japan*

## **Supporting Information**

### **Table of Contents**

|                                                                  |     |
|------------------------------------------------------------------|-----|
| 1. General experimental                                          | S2  |
| 2. Catalyst characterization                                     | S3  |
| 3. Typical procedure for 1,4-addition reaction                   | S5  |
| 4. Analytical data                                               | S7  |
| 5. Gram-scale experiments                                        | S11 |
| 6. Control experiments                                           | S12 |
| 7. Hydrolytic behavior of La <sub>2</sub> O <sub>3</sub>         | S14 |
| 8. References                                                    | S16 |
| 9. <sup>1</sup> H, <sup>13</sup> C & <sup>19</sup> F NMR spectra | S17 |

## 1. General experimental

Nuclear magnetic resonance (NMR) spectra were recorded on a JEOL ECZ-500R spectrometer, operating at 500 MHz for  $^1\text{H}$ , 126 MHz for  $^{13}\text{C}$  NMR, and 471 MHz for  $^{19}\text{F}$  NMR, or JEOL ECS-400 spectrometer, operating at 376 MHz for  $^{19}\text{F}$  NMR in  $\text{CDCl}_3$ . Tetramethylsilane (TMS) served as the internal standard ( $\delta = 0$ ) for  $^1\text{H}$  NMR,  $\text{CDCl}_3$  ( $\delta = 77.0$ ) was used as the internal standard for  $^{13}\text{C}$  NMR, and benzotrifluoride ( $\delta = -63.72$ ) was used as the internal standard for  $^{19}\text{F}$  NMR. Infrared (IR) spectra were obtained using a SHIMADZU IRSpirit spectrometer. Data are represented as frequency of absorption ( $\text{cm}^{-1}$ ). Preparative thin-layer chromatography (PTLC) was carried out using Wakogel B-5F from Wako Pure Chemical Industries, Ltd. X-ray diffraction (XRD) was recorded using MiniFlex 300/600 spectrometer in the Bragg angle range of 3-60°. Thermogravimetric analyses (TGA) were recorded using TG-DTA8122 (corundum pans, heating rate: 5  $\text{K}^{-1}$ ; atmosphere). High Resolution Mass Spectra (HRMS) were recorded using a JEOL JMS-T100TD (DART) spectrometer or Bruker Compact System (ESI). Melting points were obtained using AS ONE Melting Point Meter (ATM-02). Deionized water from a MILLIPORE MilliQ machine (Gradient A 10) was used as solvent without further treatment. All commercially available reagents, unless otherwise noted, were purchased from Tokyo Chemical Industry Co. Ltd. Deuterated water (99.8 atom% D) was purchased from Kanto Chemical Co., Inc. Lanthanum hydroxide (99.9%) was purchased from Soekawa Chemicals Co., Ltd. Metal oxides except  $\text{La}_2\text{O}_3$  were purchased from Wako Pure Chemical Industries, Ltd., Sigma-Aldrich Co. LLC., Koujundo Chemical Laboratory Co., Ltd. and Strem Chemicals, Inc. All organic solvents used were commercially available dry solvents, which were distilled appropriately under an argon atmosphere or were stored over molecular sieves prior to use. All reagents used as additives were either distilled or recrystallized before use.

## 2. Catalyst Characterization

### Synthesis of $\text{La}_2\text{O}_3$

Calcination of commercially available  $\text{La}(\text{OH})_3$  (1.5 g) in a crucible at 600 °C for 4 hours under air led to the formation of white powder (1.3 g). Structural characterization was carried out by XRD pattern and TGA, proving to be a pure  $\text{La}_2\text{O}_3$  phase.<sup>[1]</sup> The formed  $\text{La}_2\text{O}_3$  was stored in a glove box because they react readily with water and  $\text{CO}_2$  in the air.<sup>[2]</sup>

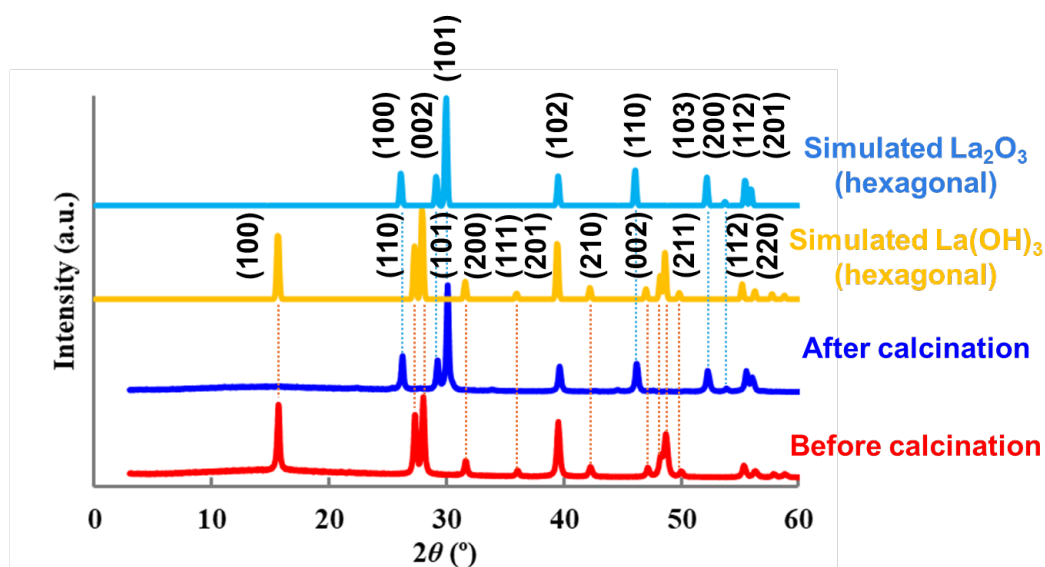

Figure S1. XRD patterns of catalysts.

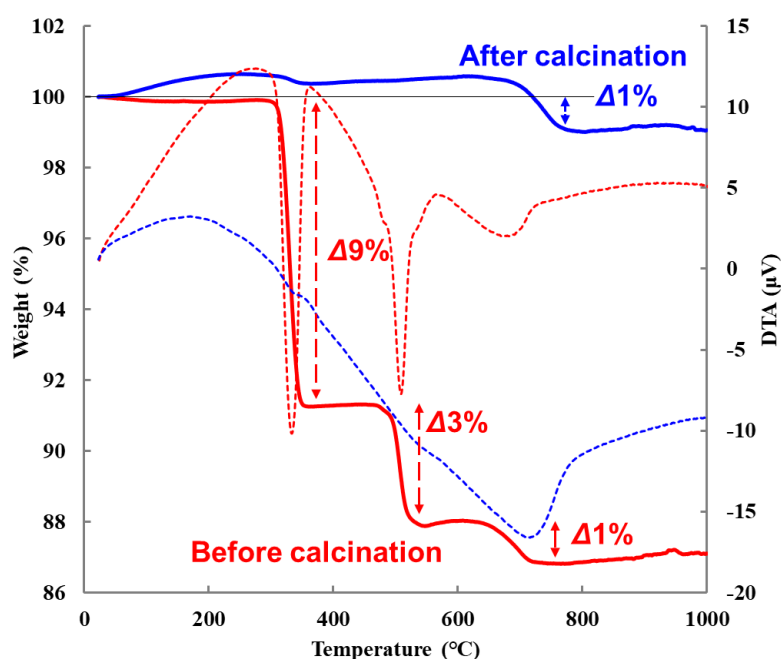

Figure S2. TG and DTA curves of catalysts.  $\text{La}_2\text{O}_3$ : Blue;  $\text{La}(\text{OH})_3$ : Red

In thermogravimetry of commercially available  $\text{La}(\text{OH})_3$ , a two-step dehydration mechanism was detected ( $<550\text{ }^\circ\text{C}$ ).<sup>[3]</sup> Considering that a mass loss in the temperature range from 600 to 800  $^\circ\text{C}$  corresponds to the release of  $\text{CO}_2$ ,<sup>[4]</sup> commercially available  $\text{La}(\text{OH})_3$  includes oxide and carbonate impurities (dehydration of 9.5% with carbonate content of 1 wt%). According to the literature,<sup>[4]</sup> the carbonate impurities are derived from the reaction with the  $\text{CO}_2$  content in the air. On the other hand, there is no observing the step of the water release after calcination, proving the powder to be pure  $\text{La}_2\text{O}_3$ . The calculation suggested a residual carbonate content of 1 wt%.

### 3. Typical procedure for 1,4-addition reaction

The anaerobically stored  $\text{La}_2\text{O}_3$  (2.0 mg, 0.006 mmol) and ethyl acetoacetate (78.1 mg, 0.60 mmol) were added to a 2 mL vial in a glove box. After the addition of (*E*)-1-(4-fluorophenyl)but-2-en-1-one (118.2 mg, 0.72 mmol), degassed pure water (1.0 mL) was poured. The vial was purged with argon and the mixture was stirred vigorously for 1 hour. The reaction was quenched with a 1M HCl solution (1.0 mL), and the mixture was extracted with  $\text{CH}_2\text{Cl}_2$  ( $20 \times 3$  mL). The combined organic layers were dried over anhydrous  $\text{Na}_2\text{SO}_4$ . After being concentrated under reduced pressure, the residue was purified by preparative TLC (hexane:EtOAc = 4:1) to afford the desired product.

#### Ethyl 2-acetyl-5-(4'-fluorophenyl)-3-methyl-5-oxopentanoate (3aa) (mixture of diastereomers)

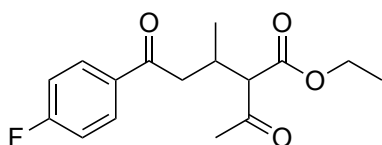

Colorless oil

IR (dichloromethane solution)  $\nu = 3075, 2976, 1710, 1596 \text{ cm}^{-1}$ .

$^1\text{H}$  NMR (500 MHz):  $\delta$  8.05-8.00 (m, 2H), 7.14 (m, 2H), 4.24-4.19 (m, 2H), 3.62+3.57 (d,  $J = 7.4$  Hz, 1H), 3.24-3.15 (m, 1H), 3.00-2.95 (m, 1H), 2.88-2.81 (m, 1H), 2.27 (s, 3H), 1.28+1.27 (t,  $J = 7.2$  Hz, 3H), 1.06+1.04 (d,  $J = 6.7$  Hz, 3H).

$^{13}\text{C}$  NMR (126 MHz):  $\delta$  202.9, 197.3, 197.3, 169.0, 168.9, 165.7 (d,  $J_{\text{C-F}} = 254.7$  Hz), 165.7 (d,  $J_{\text{C-F}} = 254.7$  Hz), 133.3 (d,  $J_{\text{C-F}} = 3.0$  Hz), 133.2 (d,  $J_{\text{C-F}} = 3.0$  Hz), 130.8 (d,  $J_{\text{C-F}} = 7.5$  Hz), 130.7 (d,  $J_{\text{C-F}} = 7.8$  Hz), 115.7 (d,  $J_{\text{C-F}} = 22.0$  Hz), 115.6 (d,  $J_{\text{C-F}} = 21.7$  Hz), 64.4, 64.0, 61.4, 61.3, 42.7, 42.4, 29.7, 29.6, 29.3, 29.0, 18.0, 17.5, 14.0.

$^{19}\text{F}$  NMR (376 MHz):  $\delta$  -106.2, -106.3.

HRMS (DART) calcd for  $\text{C}_{15}\text{H}_{18}\text{FO}_3$   $[\text{M}+\text{H}]^+$ : 295.1346; found 295.1303.

#### Modified procedure for some pronucleophiles

The anaerobically stored  $\text{La}_2\text{O}_3$  (2.5 mg, 0.008 mmol) and diethyl malonate (48.1 mg, 0.30 mmol) were added to a 2 mL vial in a glove box. After the addition of (*E*)-1-(4-fluorophenyl)but-2-en-1-one (59.1 mg, 0.36 mmol), degassed pure water (1.0 mL) was poured. The vial was purged with argon and the reaction solution was stirred vigorously for 24 hours. The reaction was quenched with a 1M HCl solution (1.0 mL), and the mixture was extracted with  $\text{CH}_2\text{Cl}_2$  ( $20 \times 3$  mL). The combined organic layers were dried

over anhydrous Na<sub>2</sub>SO<sub>4</sub>. After being concentrated under reduced pressure, the residue was purified by preparative TLC (nhexane:EtOAc = 4:1) to afford the desired product.

**Ethyl 2-acetyl-5-(4'-fluorophenyl)-3-methyl-5-oxopentanoate (3ea)**

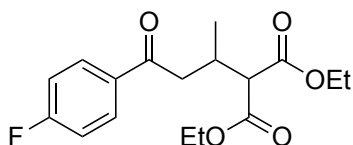

Colorless oil

IR (methanol solution)  $\nu = 2596, 2520, 2228, 2042, 1748, 1729 \text{ cm}^{-1}$ .

<sup>1</sup>H NMR (500 MHz);  $\delta$  8.05-8.02 (m, 2H), 7.13 (t,  $J = 8.6 \text{ Hz}$ , 2H), 4.25-4.18 (m, 4H), 3.47 (d,  $J = 6.6 \text{ Hz}$ , 1H), 3.30+3.27 (d,  $J = 4.2 \text{ Hz}$ , 1H), 2.96-2.95 (m, 1H), 2.90-2.85 (m, 1H), 1.29-1.25 (m, 6H), 1.09 (d,  $J = 6.7 \text{ Hz}$ , 3H).

<sup>13</sup>C NMR (126 MHz);  $\delta$  197.1, 168.6, 168.5, 165.7 (d,  $J_{\text{C-F}} = 254.7 \text{ Hz}$ ), 133.3 (d,  $J_{\text{C-F}} = 3.0 \text{ Hz}$ ), 130.7 (d,  $J_{\text{C-F}} = 9.4 \text{ Hz}$ ), 115.6 (d,  $J_{\text{C-F}} = 21.7 \text{ Hz}$ ), 61.2, 56.4, 42.5, 29.4, 17.6, 14.0, 14.0.

<sup>19</sup>F NMR (376 MHz);  $\delta -106.3$ .

HRMS (DART) calcd for C<sub>17</sub>H<sub>21</sub>FO<sub>5</sub> [M+H]<sup>+</sup>: 325.1451; found 325.1450.

## 4. Analytical data

When the product is a diastereomeric mixture, two diastereomers cannot be distinguished further in NMR spectra and some of the peaks overlap.

### Ethyl 2-acetyl-5-(4'-bromophenyl)-3-methyl-5-oxopentanoate (3ab) (mixture of diastereomers)

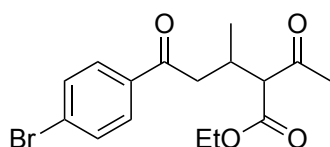

Colorless oil

IR (dichloromethane solution)  $\nu = 3055, 2980, 1711, 1682 \text{ cm}^{-1}$ .

$^1\text{H}$  NMR (500 MHz):  $\delta$  7.87-7.83 (m, 2H), 7.61-7.58 (m, 2H), 4.23-4.18 (m, 2H), 3.61+3.56 (d,  $J = 7.4$  Hz, 1H), 3.23-3.13 (m, 1H), 2.97-2.95 (m, 1H), 2.87-2.80 (m, 1H), 2.27 (s, 3H), 1.28+1.27 (t,  $J = 7.2$  Hz, 3H), 1.05+1.03 (d,  $J = 6.9$  Hz, 3H).

$^{13}\text{C}$  NMR (126 MHz):  $\delta$  202.6, 197.7, 197.6, 168.8, 168.7, 135.4, 135.3, 131.7, 131.7, 129.5, 129.5, 128.1, 128.0, 64.1, 63.8, 61.2, 61.1, 42.6, 42.3, 29.6, 29.5, 29.1, 28.8, 17.8, 17.3, 13.9.

HRMS (DART) calcd for  $\text{C}_{16}\text{H}_{20}\text{BrO}_4$   $[\text{M}+\text{H}]^+$ : 355.0545; found 355.0539.

### Ethyl 2-acetyl-3-methyl-5-oxo-5-phenylpentanoate (3ac) (mixture of diastereomers)

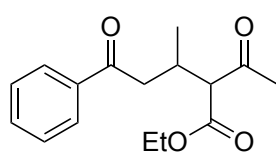

Colorless oil

IR (dichloromethane solution)  $\nu = 3060, 2935, 1732, 1711, 1681 \text{ cm}^{-1}$ .

$^1\text{H}$  NMR (500 MHz):  $\delta$  7.98 (td,  $J = 8.7, 1.2$  Hz, 2H), 7.57-7.54 (m, 1H), 7.46 (m, 2H), 4.23-4.18 (m, 2H), 3.63+3.56 (d,  $J = 7.3$  Hz, 1H), 3.23-3.15 (m, 1H), 3.01-2.98 (m, 1H), 2.92-2.85 (m, 1H), 2.27+2.26 (s,  $J = 2.0$  Hz, 3H), 1.27+1.26 (t,  $J = 7.2$  Hz, 3H), 1.06+1.04 (d,  $J = 6.9$  Hz, 3H).

$^{13}\text{C}$  NMR (126 MHz):  $\delta$  202.8, 202.8, 198.7, 198.6, 168.9, 168.8, 136.7, 136.7, 133.0, 132.9, 128.4, 128.4, 127.9, 127.9, 64.3, 63.8, 61.1, 61.1, 42.6, 42.3, 29.5, 29.5, 29.2, 28.8, 17.8, 17.3, 13.9.

HRMS (DART) calcd for C<sub>16</sub>H<sub>21</sub>O<sub>4</sub> [M+H]<sup>+</sup>: 277.1440; found 277.1451.

**Ethyl 2-acetyl-5-(4'-methoxyphenyl)-3-methyl-5-oxopentanoate (3ad)**  
(mixture of diastereomers)

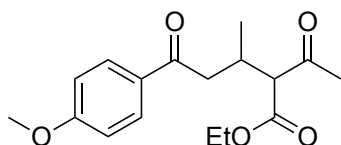

Colorless oil

IR (dichloromethane solution)  $\nu$  = 2967, 2935, 1711, 1598 cm<sup>-1</sup>.

<sup>1</sup>H NMR (500 MHz):  $\delta$  7.98-7.94 (m, 2H), 6.94-6.93 (m, 2H), 4.22-4.18 (m, 2H), 3.86 (s, 3H), 3.63+3.56 (d,  $J$  = 7.4 Hz, 1H), 3.18-3.09 (m, 1H), 2.98-2.96 (m, 1H), 2.84-2.77 (m, 1H), 2.27+2.26 (s, 3H), 1.27+1.26 (t,  $J$  = 7.2 Hz, 3H), 1.05+1.02 (d,  $J$  = 6.9 Hz, 3H).

<sup>13</sup>C NMR (126 MHz):  $\delta$  202.8, 202.8, 197.2, 197.1, 168.9, 168.8, 163.3, 163.3, 130.2, 130.2, 129.8, 129.7, 113.5, 64.4, 63.9, 61.1, 61.0, 55.2, 42.2, 42.0, 29.4, 29.4, 29.0, 17.7, 17.2, 13.9.

HRMS (DART) calcd for C<sub>17</sub>H<sub>23</sub>O<sub>5</sub> [M+H]<sup>+</sup>: 307.1546; found 307.1546.

**Ethyl 2-acetyl-4-nitro-3-phenylbutanoate (3ae)<sup>[5]</sup>**  
(mixture of diastereomers)

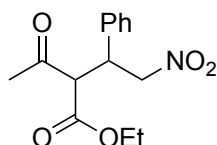

Yellow solid : m.p. 42-49 °C.

<sup>1</sup>H NMR (500 MHz);  $\delta$  7.32-7.26 (m, 3H), 7.21-7.20 (m, 2H), 4.85-4.74 (m, 2H), 4.24-4.20 (m, 2H), 4.11+4.03 (d,  $J$  = 10.0 Hz, 1H), 3.95 (q,  $J$  = 7.1 Hz, 1H), 2.29+2.04 (s, 3H), 1.27+0.99 (t,  $J$  = 7.2 Hz, 3H).

<sup>13</sup>C NMR (126 MHz);  $\delta$  201.1, 200.3, 167.4, 166.8, 136.3, 136.3, 129.0, 128.8, 128.2, 128.2, 127.9, 127.8, 77.8, 77.7, 62.1, 61.9, 61.8, 61.5, 42.5, 42.2, 30.2, 30.0, 13.9, 13.6.

**Ethyl 5-(4'-fluorophenyl)-3-methyl-5-oxo-2-pivaloylpentanoate (3ba)**  
(mixture of diastereomers)



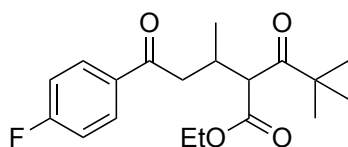

Colorless oil

IR (dichloromethane solution)  $\nu = 2970, 2874, 1733, 1596 \text{ cm}^{-1}$ .

$^1\text{H}$  NMR (500 MHz):  $\delta$  8.04-8.00 (m, 2H), 7.16-7.11 (m, 2H), 4.19-4.13 (m, 2H), 4.06+4.04 (d,  $J = 7.7 \text{ Hz}$ , 1H), 3.31+3.16 (dd,  $J = 16.5, 3.9 \text{ Hz}$ , 1H), 2.97-2.93 (m, 1H), 2.84+2.73 (m, 1H), 1.27-1.22 (m, 3H), 1.19+1.18 (s, 9H), 1.03 (t,  $J = 7.4 \text{ Hz}$ , 3H).

$^{13}\text{C}$  NMR (126 MHz):  $\delta$  209.7, 209.3, 197.3, 197.2, 168.7, 168.6, 165.6 (d,  $J_{\text{C-F}} = 254.7 \text{ Hz}$ ), 165.5 (d,  $J_{\text{C-F}} = 254.7 \text{ Hz}$ ), 133.3 (d,  $J_{\text{C-F}} = 3.0 \text{ Hz}$ ), 133.1 (d,  $J_{\text{C-F}} = 3.0 \text{ Hz}$ ), 130.7 (d,  $J_{\text{C-F}} = 9.4 \text{ Hz}$ ), 130.6 (d,  $J_{\text{C-F}} = 9.4 \text{ Hz}$ ), 115.5 (d,  $J_{\text{C-F}} = 21.7 \text{ Hz}$ ), 115.4 (d,  $J_{\text{C-F}} = 21.7 \text{ Hz}$ ), 61.1, 61.1, 57.3, 57.0, 45.4, 43.2, 42.0, 30.6, 30.5, 26.0, 26.0, 18.6, 17.0, 13.9, 13.9.

$^{19}\text{F}$  NMR (471 MHz):  $\delta$  -106.3, -106.5.

HRMS (DART) calcd for  $\text{C}_{19}\text{H}_{26}\text{FO}_4$   $[\text{M}+\text{H}]^+$ : 337.1815; found 337.1814.

### Ethyl 2-benzoyl-5-(4-fluorophenyl)-3-methyl-5-oxopentanoate (3ca)

(mixture of diastereomers)

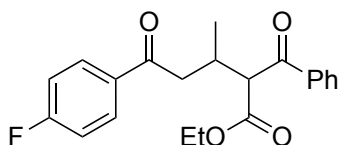

Colorless oil

IR (dichloromethane solution)  $\nu = 2976, 2936, 1730, 1596 \text{ cm}^{-1}$ .

$^1\text{H}$  NMR (500 MHz):  $\delta$  8.09-8.00 (m, 4H), 7.61-7.57 (m, 1H), 7.51-7.46 (m, 2H), 7.14-7.10 (m, 2H), 4.57+4.54 (d,  $J = 7.3 \text{ Hz}$ , 1H), 4.18-4.11 (m, 2H), 3.36-3.31 (m, 1H), 3.15-3.12 (m, 1H), 2.93+2.83 (dd,  $J = 16.3, 9.0 \text{ Hz}$ , 1H), 1.18-1.08 (m, 6H).

$^{13}\text{C}$  NMR (126 MHz):  $\delta$  197.5, 197.3, 194.9, 194.7, 169.0, 168.8, 165.6 (d,  $J_{\text{C-F}} = 254.7 \text{ Hz}$ ), 165.6 (d,  $J_{\text{C-F}} = 254.7 \text{ Hz}$ ), 136.6, 136.3, 133.5, 133.5, 133.2 (d,  $J_{\text{C-F}} = 3.0 \text{ Hz}$ ), 133.2 (d,  $J_{\text{C-F}} = 3.0 \text{ Hz}$ ), 130.7 (d,  $J_{\text{C-F}} = 9.4 \text{ Hz}$ ), 130.7 (d,  $J_{\text{C-F}} = 9.4 \text{ Hz}$ ), 128.7, 128.5, 128.4, 115.5 (d,  $J_{\text{C-F}} = 22.0 \text{ Hz}$ ), 115.5 (d,  $J_{\text{C-F}} = 22.0 \text{ Hz}$ ), 59.7 (d,  $J_{\text{C-F}} = 364.3 \text{ Hz}$ ), 59.7 (d,  $J_{\text{C-F}} = 364.3 \text{ Hz}$ ), 43.1, 42.4, 30.1, 29.7, 18.1, 17.1, 13.8, 13.8.

$^{19}\text{F}$  NMR (471 MHz):  $\delta$  -106.2, -106.3.

HRMS (ESI) calcd for  $\text{C}_{21}\text{H}_{21}\text{FNaO}_4$   $[\text{M}+\text{Na}]^+$ : 379.1316; found 379.1335.

### 2-(4-(4'-Fluorophenyl)-4-oxobutan-2-yl)malononitrile (3da)

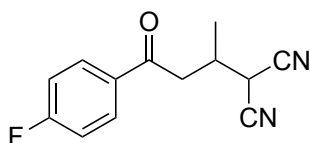

Colorless oil

IR (methanol solution)  $\nu = 2361, 2342, 2255, 1684, 1227, 841 \text{ cm}^{-1}$ .

$^1\text{H NMR}$  (500 MHz);  $\delta$  8.00-7.98 (m, 2H), 7.17 (t,  $J = 8.6 \text{ Hz}$ , 2H), 4.38 (d,  $J = 4.7 \text{ Hz}$ , 1H), 3.19-3.18 (m, 2H), 2.90-2.88 (m, 1H), 1.39 (d,  $J = 6.9 \text{ Hz}$ , 3H).

$^{13}\text{C NMR}$  (126 MHz);  $\delta$  195.4, 166.2 (d,  $J_{\text{C-F}} = 256.5 \text{ Hz}$ ), 132.3 (d,  $J_{\text{C-F}} = 3.0 \text{ Hz}$ ), 130.7 (d,  $J_{\text{C-F}} = 9.4 \text{ Hz}$ ), 116.0 (d,  $J_{\text{C-F}} = 22.0 \text{ Hz}$ ), 112.2, 111.4, 41.0, 31.3, 27.9, 17.1.

$^{19}\text{F NMR}$  (471 MHz);  $\delta -104.3$ .

HRMS (DART) calcd for  $\text{C}_{13}\text{H}_{12}\text{FN}_2\text{O}$   $[\text{M}+\text{H}]^+$ : 231.0934; found 231.0940.

**Ethyl 5-(4'-fluorophenyl)-3-methyl-2-nitro-5-oxopentanoate (3fa)**  
(mixture of diastereomers)

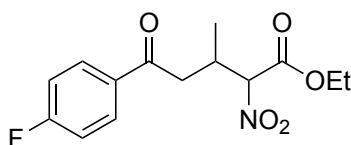

Colorless oil

IR (dichloromethane solution)  $\nu = 2959, 2927, 1745, 1682 \text{ cm}^{-1}$ .

$^1\text{H NMR}$  (500 MHz);  $\delta$  8.01-7.97 (m, 2H), 7.15 (t,  $J = 8.7 \text{ Hz}$ , 2H), 5.39+5.32 (d,  $J = 5.6 \text{ Hz}$ , 1H), 4.32-4.27 (m, 2H), 3.29-3.23 (m, 2H), 3.10-3.03 (m, 1H), 1.30 (td,  $J = 7.2, 3.0 \text{ Hz}$ , 3H), 1.20 (t,  $J = 7.3 \text{ Hz}$ , 3H).

$^{13}\text{C NMR}$  (126 MHz);  $\delta$  195.8, 195.7, 165.9 (d,  $J_{\text{C-F}} = 255.6 \text{ Hz}$ ), 165.9 (d,  $J_{\text{C-F}} = 255.3 \text{ Hz}$ ), 163.7, 163.7, 132.9 (d,  $J_{\text{C-F}} = 2.7 \text{ Hz}$ ), 132.9 (d,  $J_{\text{C-F}} = 3.0 \text{ Hz}$ ), 130.7 (d,  $J_{\text{C-F}} = 2.4 \text{ Hz}$ ), 130.7 (d,  $J_{\text{C-F}} = 2.4 \text{ Hz}$ ), 115.9 (d,  $J_{\text{C-F}} = 2.4 \text{ Hz}$ ), 115.7 (d,  $J_{\text{C-F}} = 2.4 \text{ Hz}$ ), 91.2, 90.8, 62.9, 62.9, 40.8, 40.7, 30.5, 30.5, 16.3, 16.1, 13.9, 13.8.

$^{19}\text{F NMR}$  (376 MHz);  $\delta -105.4, -105.5$ .

HRMS (ESI) calcd for  $\text{C}_{14}\text{H}_{16}\text{FNNaO}_5$   $[\text{M}+\text{Na}]^+$ : 320.0905; found 320.0913.

## 5. Gram-scale experiment

The anaerobically stored  $\text{La}_2\text{O}_3$  (16.7 mg, 0.05 mmol), and ethyl acetoacetate (650.8 mg, 5.0 mmol) were added to a 6 mL vial in a glove box. After the addition of (*E*)-1-(4-fluorophenyl)but-2-en-1-one (984.8 mg, 6.0 mmol), degassed pure water (4.5 mL) was poured. The vial was purged with argon and the mixture was stirred vigorously for 1 hour. The reaction was quenched with a 1M HCl solution (8.4 mL), and the mixture was extracted with  $\text{CH}_2\text{Cl}_2$  ( $20 \times 3$  mL). The combined organic layers were dried over anhydrous  $\text{Na}_2\text{SO}_4$ . After being concentrated under reduced pressure, the residue was purified by column chromatography (*n*-hexane:EtOAc = 4:1) to afford the desired product as a colorless oil (1.3674 g, 93%).

## 6. Control Experiments

### Effect of rare earth oxides

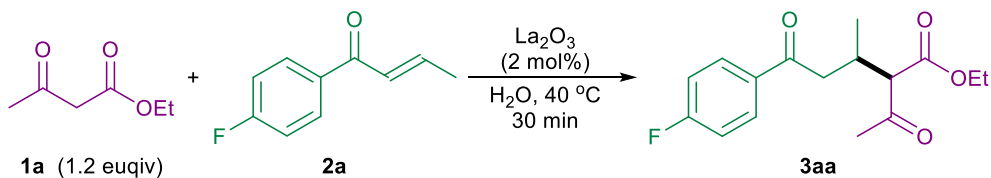

| Rare earth oxides          | Yield (%) <sup>a</sup> | Rare earth oxides       | Yield (%) <sup>a</sup> |
|----------------------------|------------------------|-------------------------|------------------------|
| $\text{Sc}_2\text{O}_3$    | 0 (2 h)                | $\text{Gd}_2\text{O}_3$ | 31 (62) <sup>b</sup>   |
| $\text{Y}_2\text{O}_3$     | 11                     | $\text{Tb}_4\text{O}_7$ | 0 (2 h)                |
| $\text{La}_2\text{O}_3$    | 90                     | $\text{Dy}_2\text{O}_3$ | 12                     |
| $\text{CeO}_2$             | 0 (2 h)                | $\text{Ho}_2\text{O}_3$ | 11 (2 h)               |
| $\text{Pr}_6\text{O}_{11}$ | 7 (2 h)                | $\text{Er}_2\text{O}_3$ | 0 (2 h)                |
| $\text{Nd}_2\text{O}_3$    | 38 (74) <sup>b</sup>   | $\text{Tm}_2\text{O}_3$ | 7 (2 h)                |
| $\text{Sm}_2\text{O}_3$    | 47 (80) <sup>b</sup>   | $\text{Yb}_2\text{O}_3$ | 4                      |
| $\text{Eu}_2\text{O}_3$    | 38 (48) <sup>c</sup>   | $\text{Lu}_2\text{O}_3$ | 1                      |

<sup>a</sup> Determined by  $^1\text{H}$  NMR analysis. <sup>b</sup> Synthesized from  $\text{M}(\text{OH})_3$  by calcination at  $900\text{ }^\circ\text{C}$  for 3 h.

<sup>c</sup> Prepared by calcination of commercially available  $\text{Eu}_2\text{O}_3$  at  $600\text{ }^\circ\text{C}$  for 4 h.

### Effect of stirring

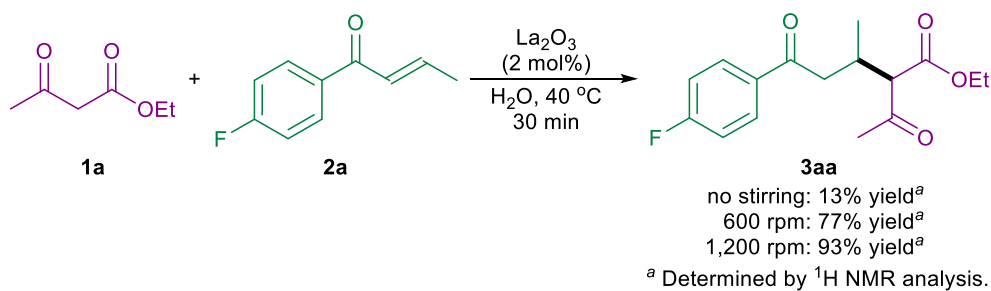

### Effect of $\text{La}_2\text{O}_3$ particle size

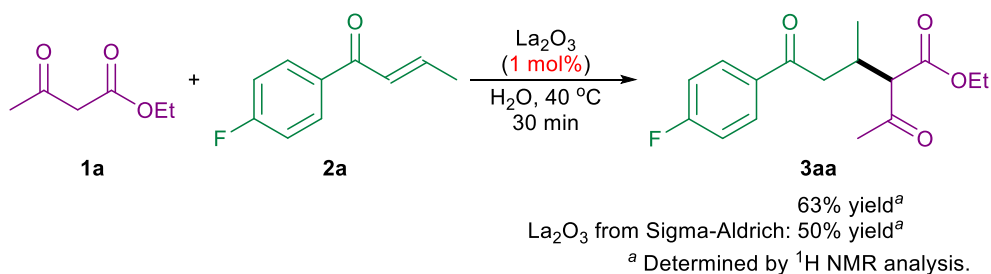

## Effect of additives for reaction with diethyl malonate

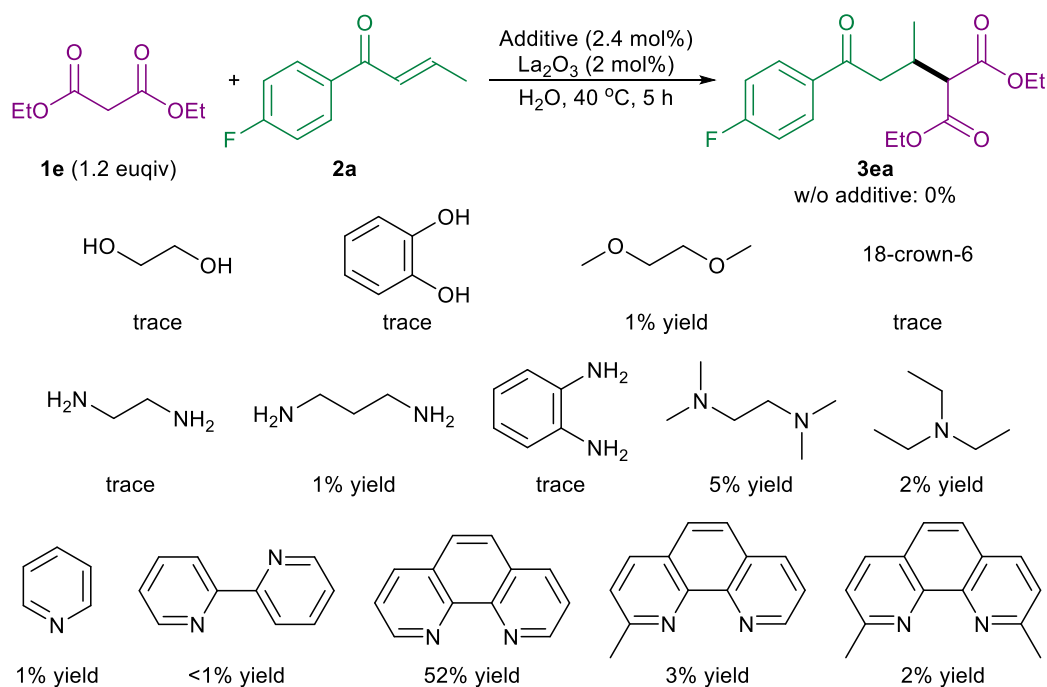

## Reaction run in deuterium oxide

(Table 1b, entry 1)

According to the general procedure, water was replaced with degassed pure  $\text{D}_2\text{O}$ . The mixture was quenched with 1M deuterium chloride solution in  $\text{D}_2\text{O}$  and extracted with  $\text{CH}_2\text{Cl}_2$  ( $20 \times 3$  mL). The combined organic layers were dried over anhydrous  $\text{Na}_2\text{SO}_4$ . After being concentrated under reduced pressure, the ratio of hydrogen and deuterium was determined by  $^1\text{H}$  NMR analysis because deuterium was exchanged again with proton at the most acidic position upon purification by preparative TLC ( $n$ -hexane:EtOAc = 4:1). About 90% of C–H bond newly formed at C4 position was proved to be deuterium.

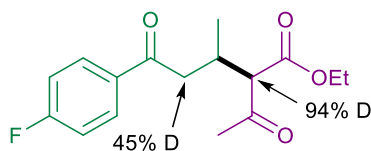

## 7. Hydrolytic Behavior of La<sub>2</sub>O<sub>3</sub>

It is known that La<sub>2</sub>O<sub>3</sub>-based materials can react relatively quickly with water/carbon dioxide in the atmosphere to form new bulk hydroxyl, carbonate, and mixed phases.<sup>[6]</sup> Because La(OH)<sub>3</sub> has no activity in the reaction developed in this study, the hydrolysis is associated with the catalytic activity. Therefore, the hydrolytic behavior of La<sub>2</sub>O<sub>3</sub> was roughly studied. As-calcined La<sub>2</sub>O<sub>3</sub> (>100 mg) was placed in a vial and stirred in water (3 mL) at 40 °C for an hour. The solid was collected by centrifugation, the removal of supernatant, and filtration. The full recovery was technically difficult due to the ease of forming colloidal dispersions. After drying in a vacuum overnight, the solid was subjected to XRD analysis (Figure S3). The peaks corresponding to La<sub>2</sub>O<sub>3</sub> nearly disappeared and peaks corresponding to La(OH)<sub>3</sub> appeared instead, whether in the presence or absence of 1,10-phenanthroline. In addition, the observed decay of intensity suggests the transition of the crystalline state to an amorphous state of La<sub>2</sub>O<sub>3</sub> as well as its conversion into La(OH)<sub>3</sub>.

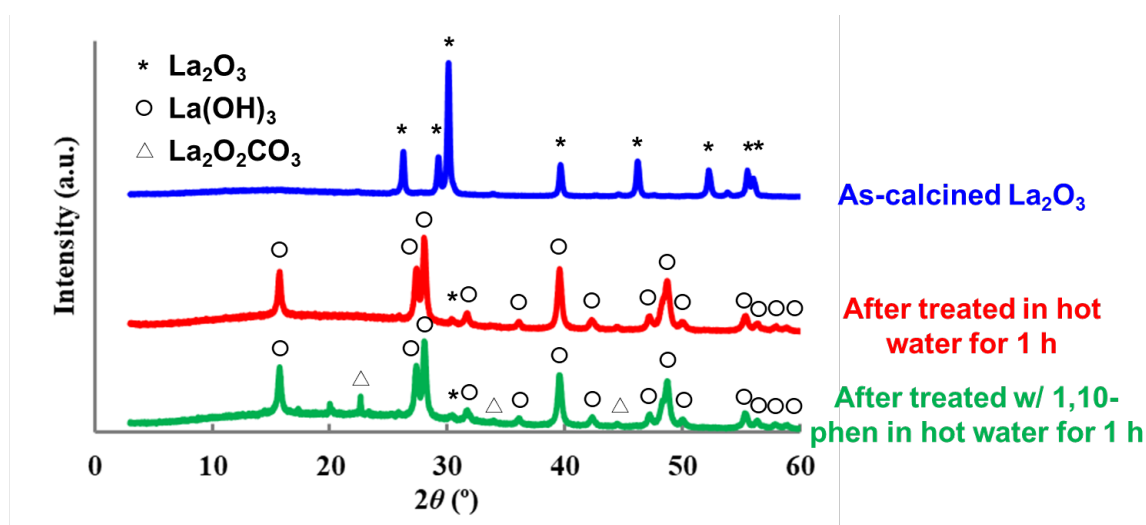

**Figure S3.** XRD patterns of La<sub>2</sub>O<sub>3</sub> and effect of treatment in water.

Similarly, the effect of the pretreatment in water on the activity of La<sub>2</sub>O<sub>3</sub> was examined. In contrast to the optimized conditions that provide almost quantitative conversion of **1e** to the desired product **3ea**, the pre-stirring of La<sub>2</sub>O<sub>3</sub> in water significantly reduced the activity of La<sub>2</sub>O<sub>3</sub>. This result suggests that amorphous La<sub>2</sub>O<sub>3</sub> exhibits significantly poorer catalytic performance. The presence or absence of 1,10-phen in the pretreatment had no effect. Overall, the reaction outcome is consistent with the result of XRD analysis.

<pretreatment w/o 1,10-phen>

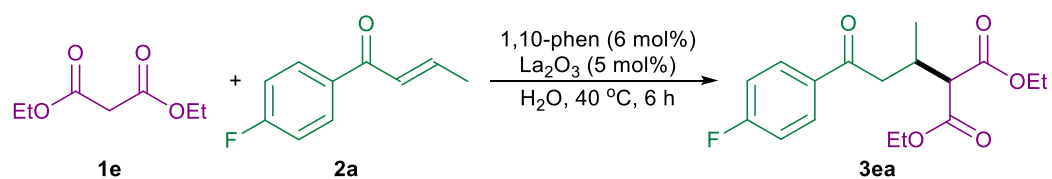

<Procedure of pretreatment> 1,10-phen (6 mol%),  
**1e, 2a** (1.2 equiv)

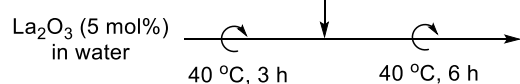

17% yield<sup>a</sup>  
w/o pretreatment: 97% yield (5 h)<sup>a</sup>  
<sup>a</sup> Determined by <sup>1</sup>H NMR analysis.

<pretreatment w/ 1,10-phen>

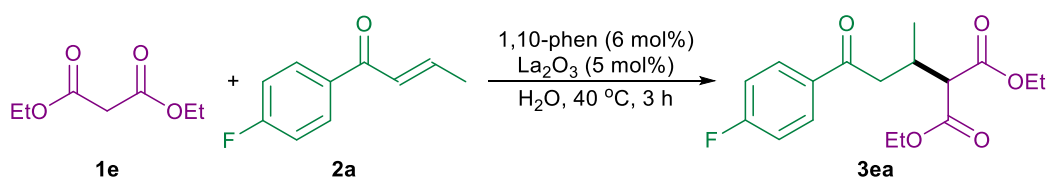

<Procedure of pretreatment>

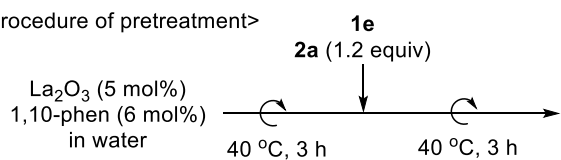

12% yield<sup>a</sup>  
w/o pretreatment: 84% yield (5 h)<sup>a</sup>  
<sup>a</sup> Determined by <sup>1</sup>H NMR analysis.

## 8. Reference

- [1] W. C. Koehler, E. O. Wollan, *Acta Cryst.* **1953**, *6*, 741–742.
- [2] S. Bernal, F. J. Botana, R. Garcia, J. M. Rodriguez-Izquierdo, *React. Solids* **1987**, *4*, 23–40.
- [3] D. Walter, *Z. Anorg. Allg. Chem.* **2006**, *632*, 2165.
- [4] B. P. Gangwar, Y. Pakakollu, A. Singh, S. Kanvah, S. Sharma, *RSC Adv.* 2014, **4**, 55407–55416.
- [5] D. A. Evans, D. Seidel, *J. Am. Chem. Soc.* **2005**, *127*, 9958–9959.
- [6] P. Fleming, R. A. Farrell, J. D. Holmes, M. A. Morris, *J. Am. Ceram. Soc.* **2010**, *93*, 1187–1194.



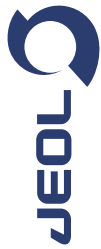

9

<sup>1</sup>H, <sup>13</sup>C & <sup>19</sup>F

NMR spectra

----- PROCESSING PARAMETERS -----  
sexp( 0.25016[Hz], 0.0[s] )  
trapezoid( 0[%], 0[%], 80[%], 100[%] )  
zerofill( 2, TRUE )  
fft( 1, TRUE, TRUE )  
machinephase  
ppm  
Phase( -0.10469, -1.78517, 8.93645[%] )

Filename = R00450-dry\_PRO  
Author = console  
Experiment = single pulse.j  
Sample Id = R00450-dry  
Solvent = CHLOROFORM-D  
Actual\_Start\_Time = 9-FEB-2024 18  
Revision\_Time = 2-MAY-2024 08

Data Format = 1D COMPLEX  
Dim Size = 52429  
X Domain = Proton  
Dim Title = Proton  
Dim Units = [ppm]  
Dimensions = X  
Site = JNM-ECZ500R/M3  
Spectrometer = JNM-ECZ500R/M3

Field Strength = 11.7473579[T]  
X Acq\_Duration = 1.99874592[s]  
X Domain = Proton  
X\_Freq = 500.15991521[M]  
X\_Offset = 5.0[ppm]  
X Points = 18757  
X Points\_Input = 15005  
X Resolution = 0.50031372[Hz]  
X\_Sweep = 9.38438438[kHz]  
X\_Sweep\_Clippped = 7.50750751[kHz]  
X\_Sweep\_Input = 15[ppm]  
Irr Domain = Proton  
Irr Freq = 500.15991521[M]  
Irr\_Offset = 5.0[ppm]  
Tri\_Domain = Proton  
Tri\_Freq = 500.15991521[M]  
Tri\_Offset = 5.0[ppm]  
Blanking = FALSE  
Clipped = 8  
Total\_Scans = 8

Relaxation\_Delay = 4[s]  
Recvr Gain = 32  
Temp\_Cnt = 23.2[dc]  
X\_90\_Width = 7.67[us]  
X\_Acq\_Time = 1.99874592[s]  
X\_Atn = 45[deg]  
X Angle = 7.4[db]  
X Data Points = 32768  
X Points\_Default = 31282  
X\_Pulse\_Width = 3.835[us]  
Irr\_Mode = Off  
Tri\_Mode = Off  
Dante\_Loop = 400

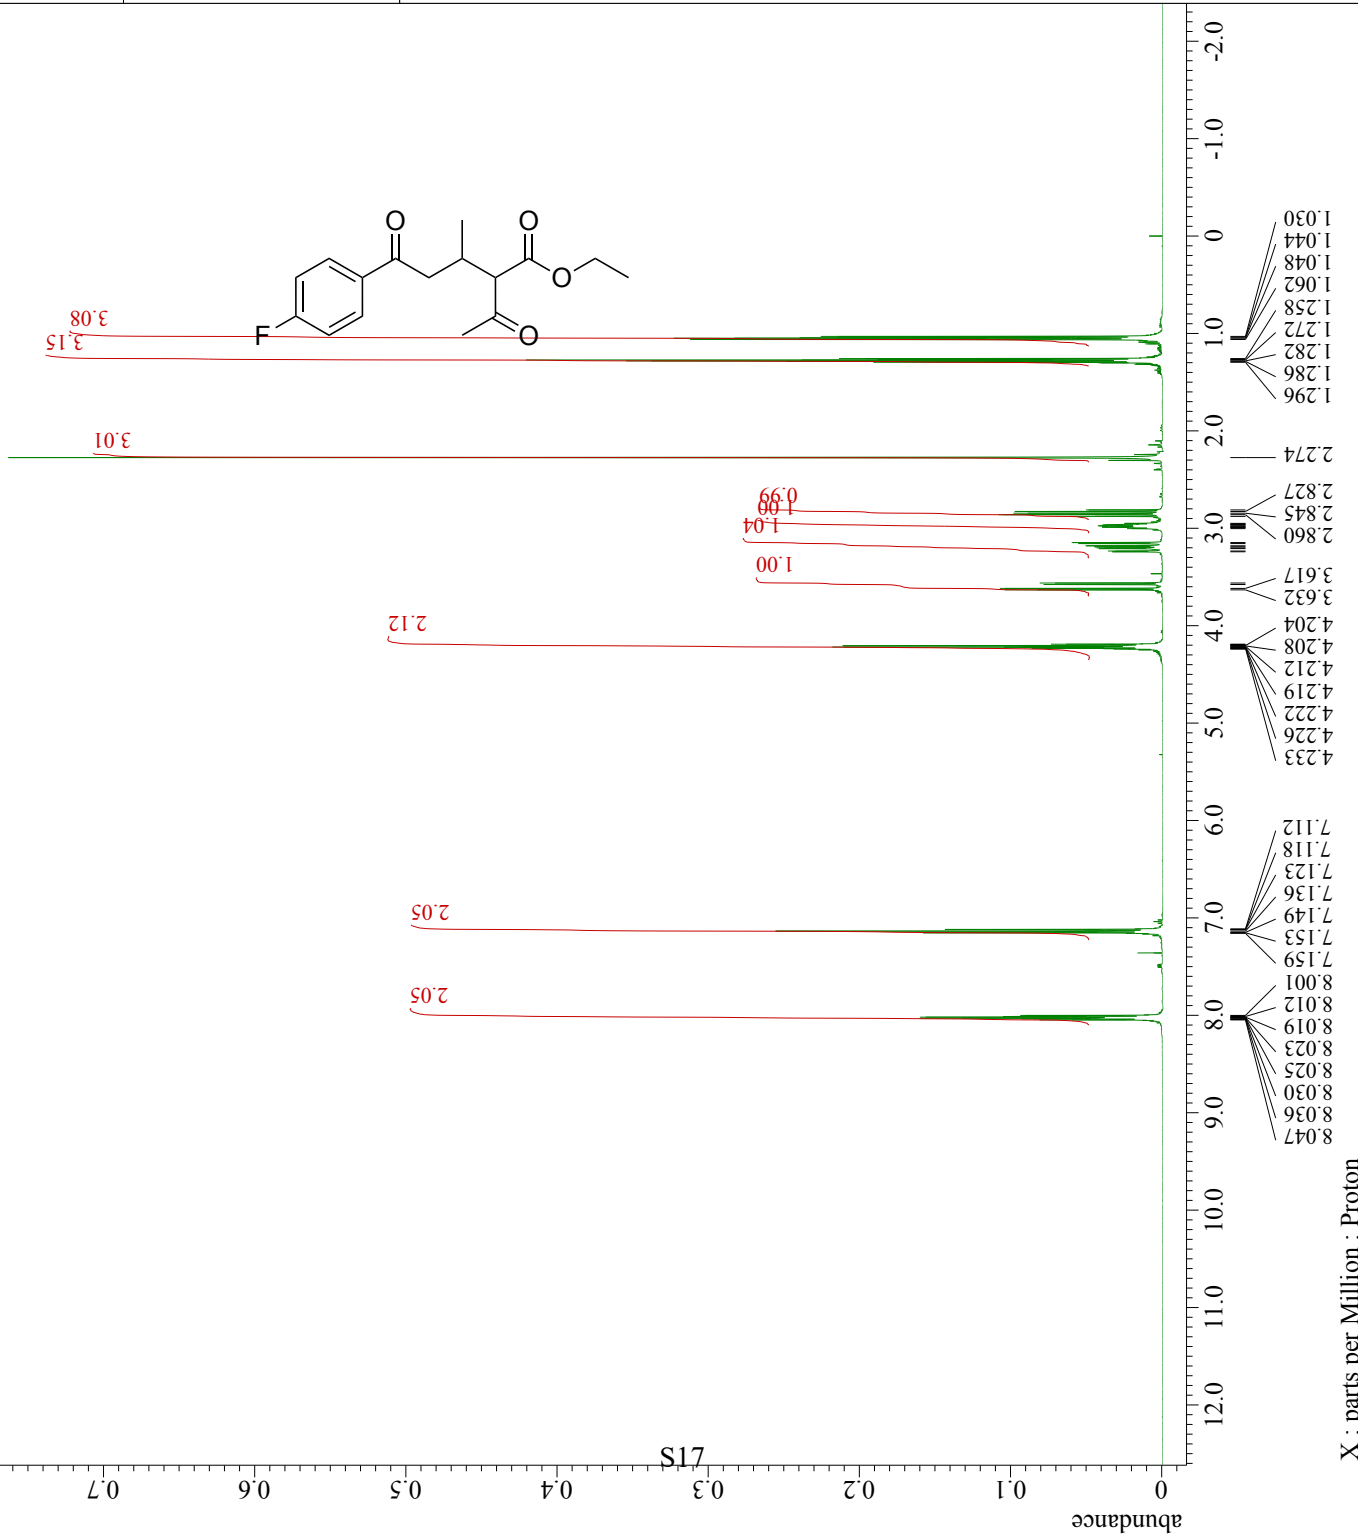

X : parts per Million : Proton

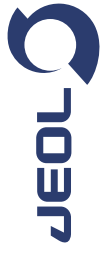

```
----- PROCESSING PARAMETERS -----
sexp( 1.00646[Hz], 0.0[s] )
trapezoid( 0[%], 0[%], 80[%], 100[%] )
zerofill( 2, TRUE )
fft( 1, TRUE, TRUE )
machinephase
ppm
thresh( 5[%], 1 )
peak_pck( 0[Hz], 0.1[ppm], Peaks, 0[Hz] )
reference( 77.12391[ppm], 77[ppm] )
```

```
Filename = R00515-purifie
Author = delta
Experiment = carbon_jxp
Sample_Id = R00515-purifie
Solvent = CHLOROFORM-D
Actual_Start_Time = 1-MAY-2024 19
Revision_Time = 1-MAY-2024 20

Data_Format = 1D COMPLEX
Dim_Size = 104858
X_Domain = Carbon13
Dim_Title = Carbon13
Dim_Units = [ppm]
Dimensions = X
Site = JNM-ECZ500R/M3
Spectrometer = JNM-ECZ500R/M3

Field_Strength = 11.7473579[T]
X_Acq_Duration = 0.99357984[s]
X_Domain = Carbon13
X_Freq = 125.76529768[M]
X_Offset = 100[ppm]
X_Points = 39303
X_Points_Input = 31442
X_Prescans = 4
X_Resolution = 1.00646164[Hz]
X_Sweep = 39.55696203[kH]
X_Sweep_Clippped = 31.64556962[kH]
X_Sweep_Input = 251.0[ppm]
Irr_Domain = Proton
Irr_Freq = 500.15991521[M]
Irr_Offset = 5.0[ppm]
Blanking = FALSE
Clipped = 281
Total_Scans = 281

Relaxation_Delay = 2[s]
Recvr_Gain = 52
Temp_Get = 23.4[°C]
X_90_Width = 14.23[us]
X_Acq_Time = 0.99357984[s]
X_Angle = 30[deg]
X_Attn = 11.5[dB]
X_Data_Points = 32768
X_Points_Default = 39557
Irr_Atn_Dec = 4.74333333[us]
Irr_Atn_Dec_Calc = 23.9[dB]
Irr_Atn_Noise = 23.9[dB]
Irr_Bandwidth = 5.97826087[kHz]
Irr_Corresp_Fw90 = 11.9526989[ppm]
Irr_Corresp_Pw90 = 92[us]
```

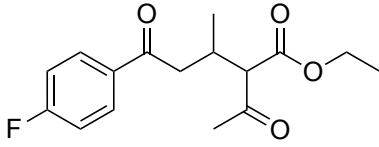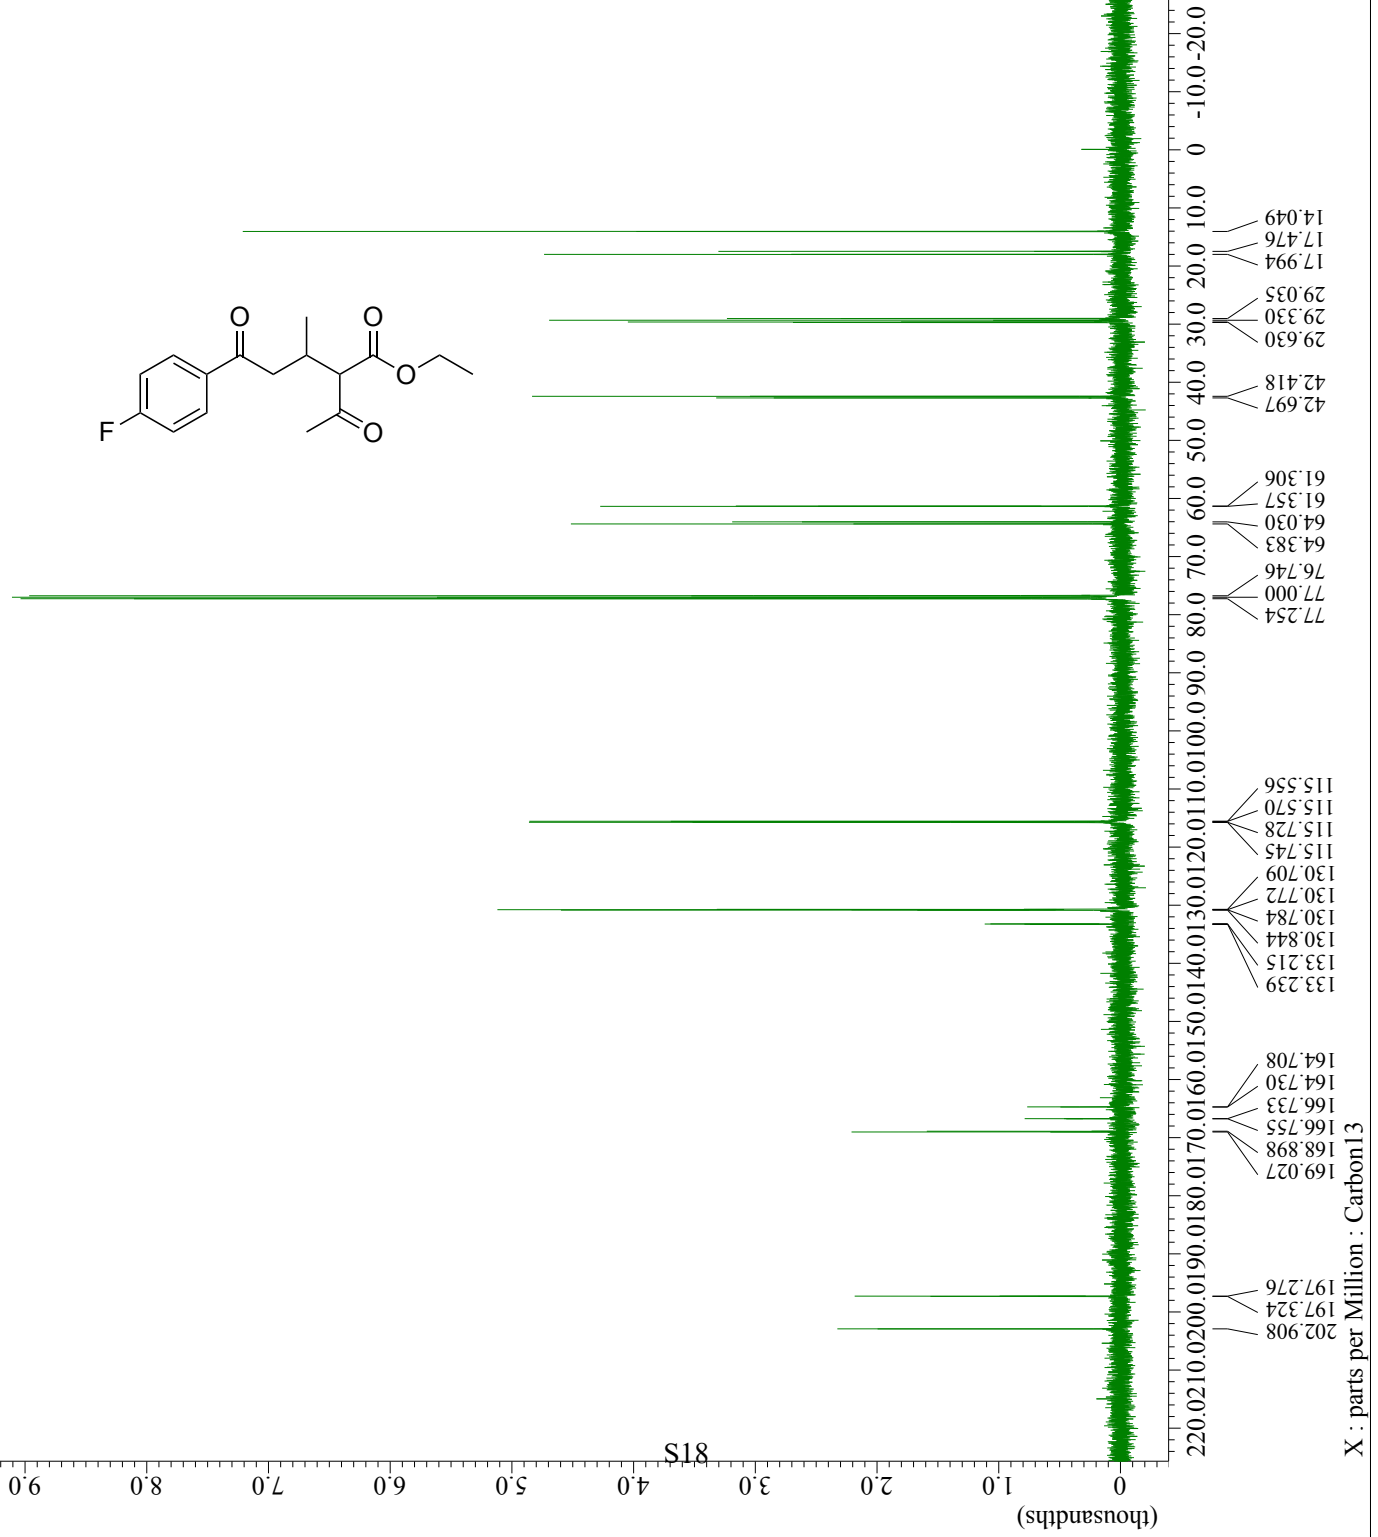

X : parts per Million : Carbon13

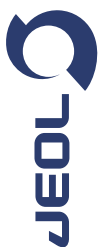

---- PROCESSING PARAMETERS ----  
dc balance( 0, FALSE )  
sexp( 0.2[Hz], 0.0[s] )  
trapzoid( 0[&], 0[&], 80[&], 100[&] )  
zerofill( 1, TRUE )  
fft( 1, TRUE, TRUE )  
machinephase  
ppm  
phase( 12.5, 93, 65.55013[&] )  
reference( -62.65821[ppm], -63.72[ppm] )  
thresh( 64.39011[&], 1 )  
reference( -63.72[ppm], -63.72[ppm] )

以下由来: R00477b-purified\_fluorine-1-1.jdf

Filename = R00477b-purified\_fluorine  
Author = delta  
Experiment = Proton.jxp  
Sample\_Id = R00477b-purified  
Solvent = CHLOROFORM-D  
Actual\_Start\_Time = 10-APR-2024 10:23:05  
Revision\_Time = 12-APR-2024 10:51:48  
Comment = single\_pulse  
Data\_Format = 1D\_COMPLEX  
Dim\_Size = 13107  
X\_Domain = Fluori  
Dim\_Title = Fluorine19  
Dim\_Units = [ppm]  
Dimensions = X  
Site = JNM-ECS400  
Spectrometer = DELTA2\_NMR  
Field\_Strength = 9.389766[T] (400 [MHz])  
X\_Acq\_Duration = 86.50752[ms]  
X\_Domain = 19F  
X\_Freq = 376.17105393 [MHz]  
X\_Offset = 0[ppm]  
X\_Points = 16384  
X\_Prescans = 1  
X\_Resolution = 11.5596868 [Hz]  
X\_Sweep = 189.3939393 [kHz]  
X\_Sweep\_Clippped = 151.515152 [kHz]  
Irr\_Domain = Fluorine19  
Irr\_Freq = 376.17105393 [MHz]  
Irr\_Offset = 5[ppm]  
Tri\_Domain = Fluorine19  
Tri\_Freq = 376.17105393 [MHz]  
Tri\_Offset = 5[ppm]  
Clipped = TRUE  
Scans = 8  
Total\_Scans = 8  
Relaxation\_Delay = 5[s]  
Recvr Gain = 50  
Temp\_Get = 25[dc]  
X\_90\_Width = 7.95[us]  
X\_Acq\_Time = 86.50752[ms]  
X\_Angle = 45[deg]  
X\_Attn = 3[db]  
X\_Pulse = 3.975[us]  
Irr\_Mode = Off  
Tri\_Mode = Off  
Dante\_Presat = FALSE  
Initial\_Wait = 1[s]  
Repetition\_Time = 5.08650752[s]

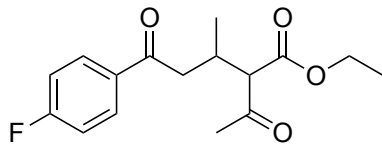

PhCF<sub>3</sub>

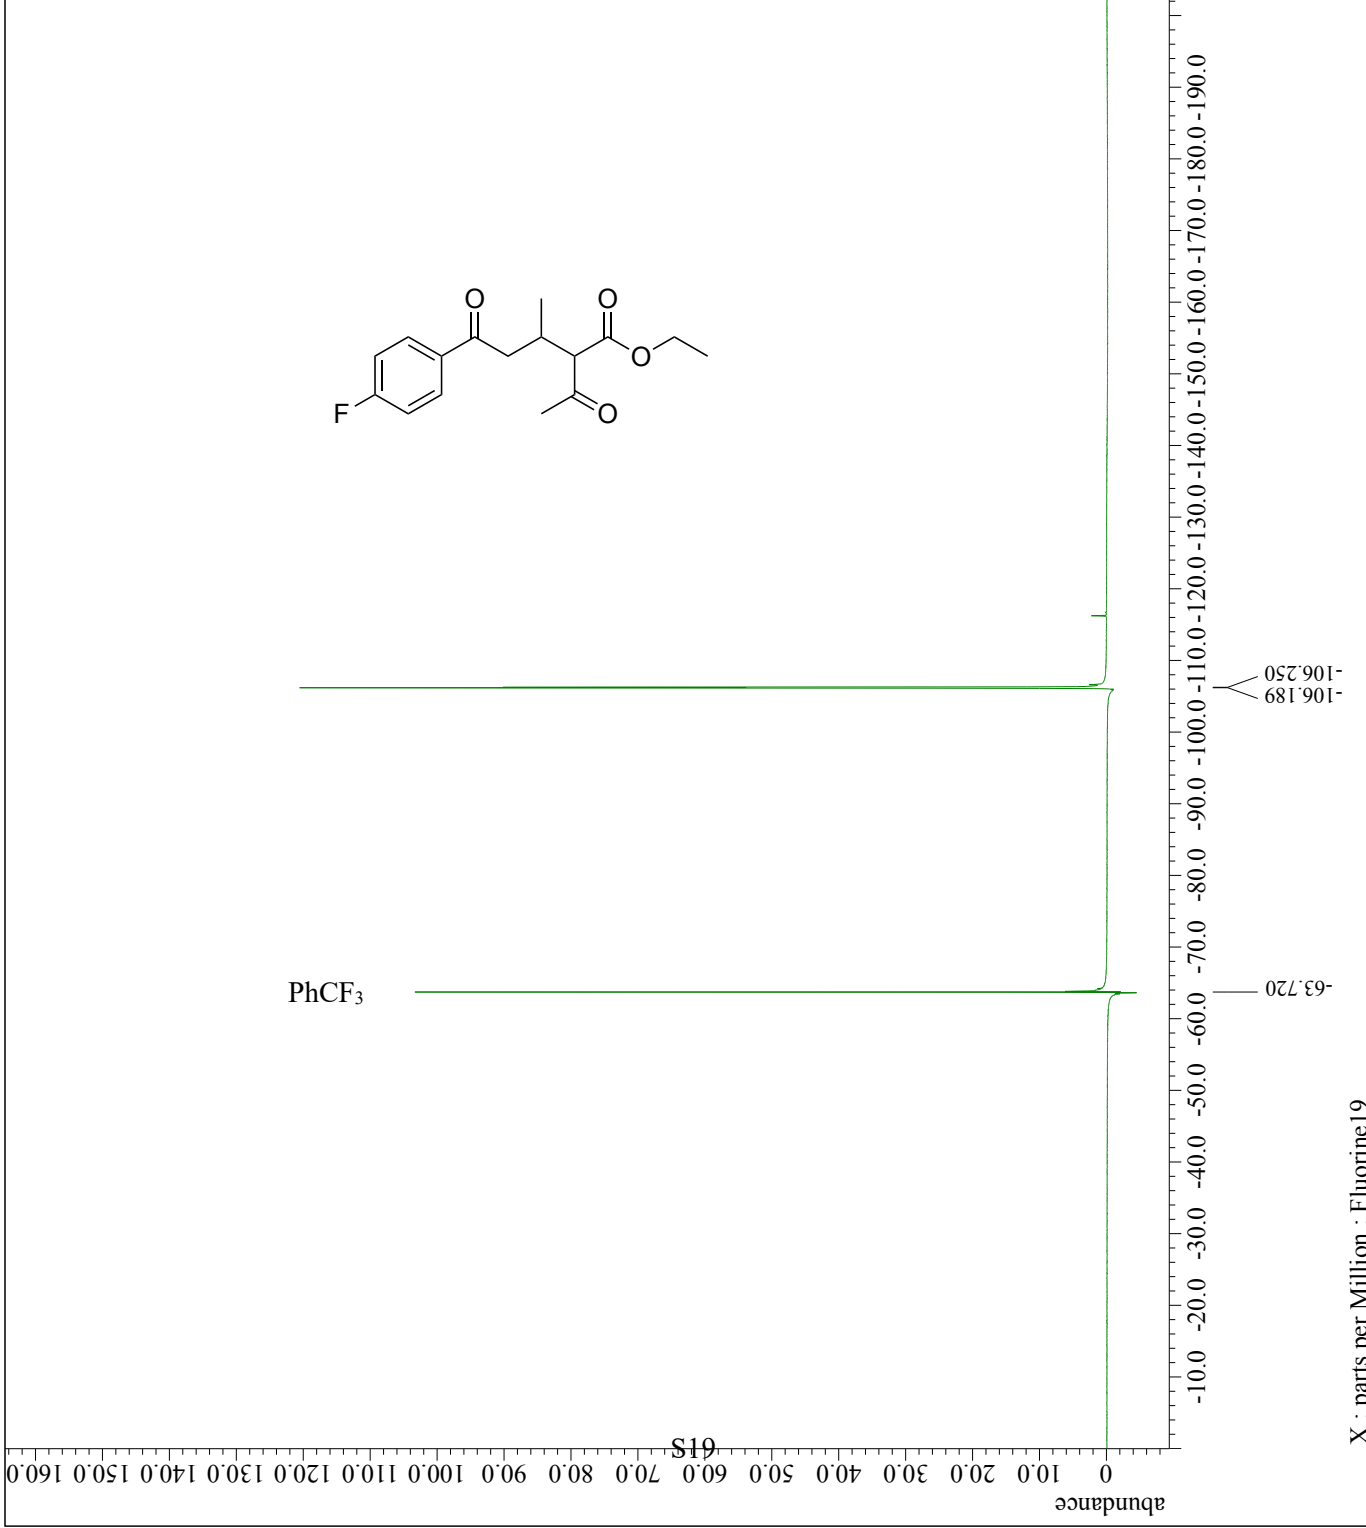

X : parts per Million : Fluorine 19

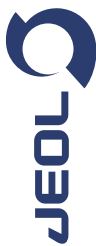

----- PROCESSING PARAMETERS -----  
sexp( 0.25016[Hz], 0.0[s] )  
trapezoid( 0[%], 0[%], 80[%], 100[%] )  
zerofill( 2, TRUE )  
fft( 1, TRUE, TRUE )  
machinephase  
ppm  
phase( -0.76415, 8.49971, 68.86206[%] )  
reference( -0.09723[ppm], 0[ppm] )

File Name = R00475-dry\_PRO  
Author = delta  
Experiment = single pulse.j  
Sample Id = R00475-dry  
Solvent = CHLOROFORM-D  
Actual\_Start\_Time = 2-MAR-2024 12  
Revision\_Time = 22-APR-2024 08

Data Format = 1D COMPLEX  
Dim Size = 52429  
X Domain = Proton  
Dim Title = Proton  
Dim Units = [ppm]  
Dimensions = X  
Site = JNM-ECZ500R/M3  
Spectrometer = JNM-ECZ500R/M3

Field Strength = 11.7473579 [T]  
X Acq Duration = 1.99874592 [s]  
X Domain = Proton  
X Freq = 500.15991521 [M]  
X Offset = 5.0 [ppm]  
X Points = 18757  
X Points Input = 15005  
X Prescans = 0  
X Resolution = 0.50031372 [Hz]  
X Sweep = 9.38438438 [kHz]  
X Sweep Clipped = 7.50750751 [kHz]  
X Sweep Input = 15 [ppm]  
Irr Domain = Proton  
Irr Freq = 500.15991521 [M]  
Irr Offset = 5.0 [ppm]  
Irr Domain = Proton  
Tri Freq = 500.15991521 [M]  
Tri Offset = 5.0 [ppm]  
Blanking = FALSE  
Clipped = 8  
Total\_Scans = 8

Relaxation\_Delay = 4 [s]  
Recvr Gain = 32  
Temp Get = 21.8 [dc]  
X 90 Width = 7.67 [us]  
X Acq Time = 1.99874592 [s]  
X Angle = 45 [deg]  
X Atn = 7.4 [dB]  
X Data Points = 32768  
X Points\_Default = 31282  
X Pulse = 3.835 [us]  
Irr Mode = Off  
Tri Mode = Off  
Dante\_Loop = 400

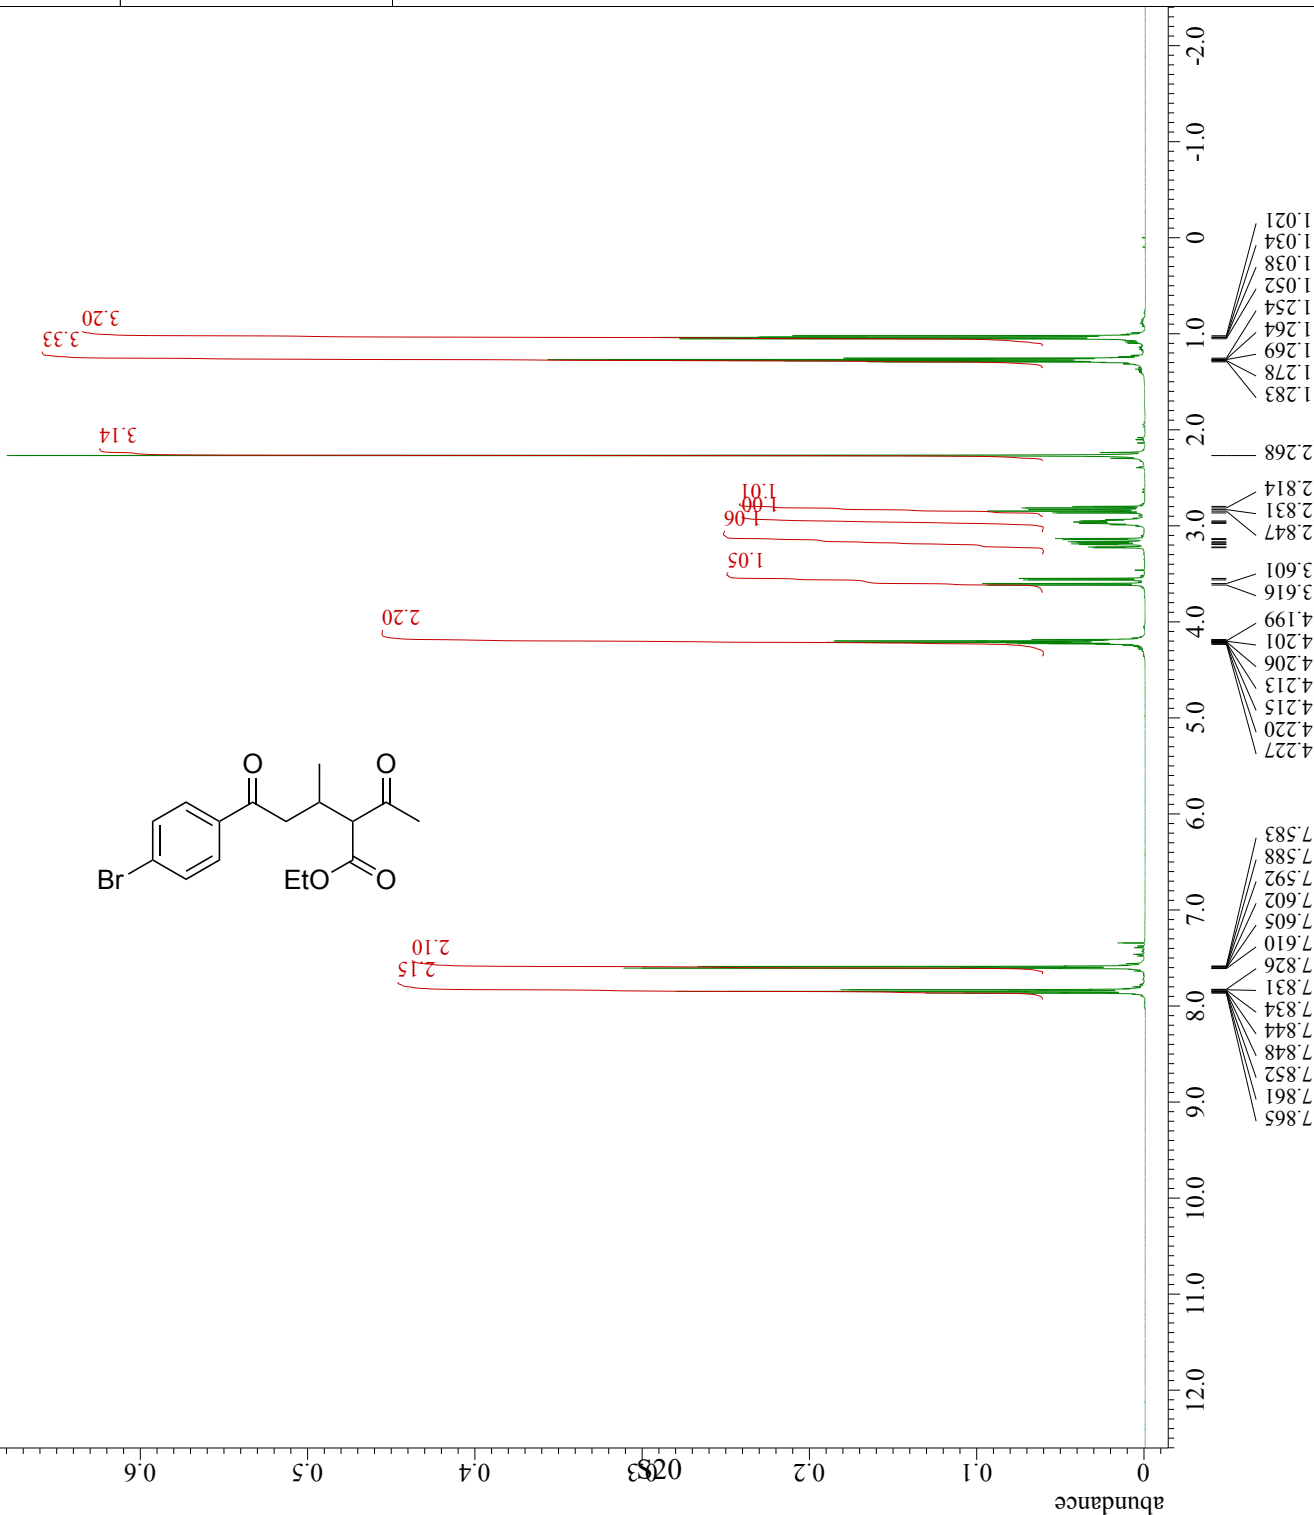

X : parts per Million : Proton

(thousands)

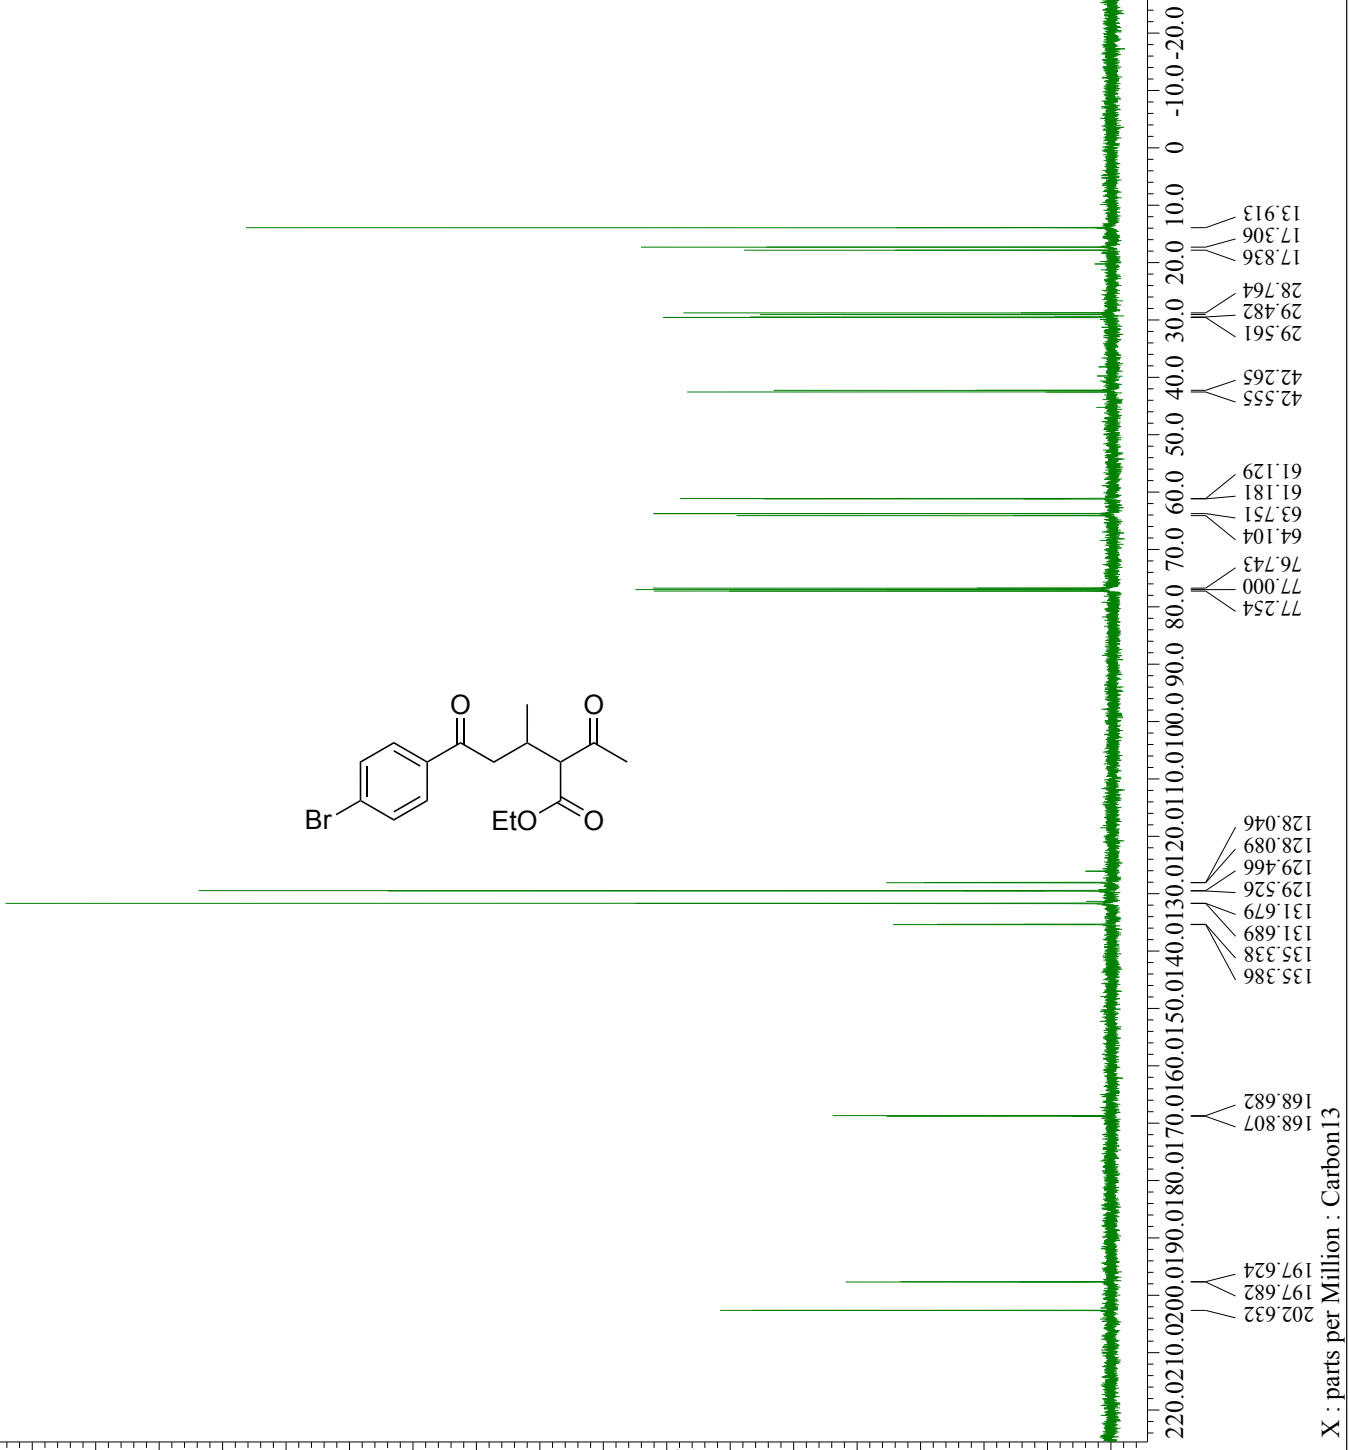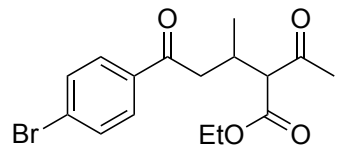

---- PROCESSING PARAMETERS ----  
sexp( 1.00646[Hz], 0.0[us] )  
trapezoid( 0[%], 0[%], 80[%], 100[%] )  
zerofill( 2, TRUE )  
fft( 1, TRUE, TRUE )  
machinephase  
ppm  
thresh( 5[%], 1 )  
peak\_pick( 0[Hz], 0.1[ppm], Peaks, 0[Hz] )  
reference( 77.24869 [ppm], 77 [ppm] )

Filename = R00475-dry\_CAR  
Author = delta  
Experiment = carbon.jxp  
Sample Id = R00475-dry  
Solvent = CHLOROFORM-D  
Actual\_Start\_Time = 2-MAR-2024 12  
Revision\_Time = 12-APR-2024 15  
Data\_Format = 1D COMPLEX  
Dim\_Size = 104858  
X\_Domain = Carbon13  
Dim\_Title = Carbon13  
Dim\_Units = [ppm]  
Dimensions = X  
Site = JNM-EZ500R/M3  
Spectrometer = JNM-EZ500R/M3  
Field\_Strength = 11.7473579 [T]  
X\_Acq\_Duration = 0.99357984 [s]  
X\_Domain = Carbon13  
X\_Freq = 125.76529768 [M]  
X\_Offset = 100 [ppm]  
X\_Points = 39303  
X\_Points\_Input = 31442  
X\_Prescans = 4  
X\_Resolution = 1.00646164 [Hz]  
X\_Sweep = 39.55696203 [kHz]  
X\_Sweep\_Clippped = 31.64556962 [kHz]  
X\_Sweep\_Input = 251.0 [ppm]  
Irr\_Domain = Proton  
Irr\_Freq = 500.15991521 [M]  
Irr\_Offset = 5.0 [ppm]  
Blanking = FALSE  
Clipped = 103  
Total\_Scans = 103  
Relaxation\_Delay = 2 [s]  
Recvr Gain = 52  
Temp\_Get = 21.8 [dC]  
X\_90\_Width = 12.19 [us]  
X\_Acq\_Time = 0.99357984 [s]  
X\_Angle = 30 [deg]  
X\_Atn = 11.5 [dB]  
X\_Data\_Points = 32768  
X\_Points\_Default = 4.063333333 [us]  
Irr\_Atn\_Dec = 39557  
Irr\_Atn\_Dec\_Calc = 29 [dB]  
Irr\_Atn\_Noise\_Calc = 29 [dB]  
Irr\_Bandwidth = 5.97826087 [kHz]  
Irr\_Bandwidth\_Ppm = 11.9526989 [ppm]  
Irr\_Corresp\_Pw90 = 92 [us]

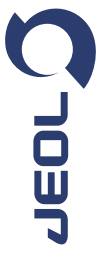

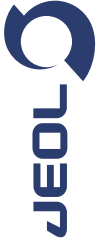

```
----- PROCESSING PARAMETERS -----
exp( 0.25016[Hz], 0.0[s] )
trapezoid( 0[%], 0[%], 80[%], 100[%] )
zerofill( 2, TRUE )
fft( 1, TRUE, TRUE )
machinephase
ppm
phase( -0.39695, 3.38065, 68.73045[%] )
reference( -0.07748[ppm], 0[ppm] )
```

```
Filename = R00471-dry_PRO
Author = delta
Experiment = single_pulse.j
Sample Id = R00471-dry
Solvent = CHLOROFORM-D
Actual Start Time = 2-MAR-2024 12
Revision_Time = 22-APR-2024 07

Data_Format = 1D COMPLEX
Dim_Size = 52429
X_Domain = Proton
Dim Title = Proton
Dim Units = [ppm]
Dimensions = X
Site = JNM-ECZ500R/M3
Spectrometer = JNM-ECZ500R/M3

Field_Strength = 11.7473579[T]
X_Acq_Duration = 1.99874592[s]
X_Domain = Proton
X_Freq = 500.15991521[M]
X_Offset = 5.0[ppm]
X_Points_Input = 18757
X_Prescans = 15005
X_Resolution = 0
X_Sweep = 0.50031372[Hz]
X_Sweep_Clipped = 9.38438438[kHz]
X_Sweep_Input = 7.50750751[kHz]
Irr_Domain = Proton
Irr_Freq = 500.15991521[M]
Irr_Offset = 5.0[ppm]
Tri_Domain = Proton
Tri_Freq = 500.15991521[M]
Tri_Offset = 2[us]
Blanking = FALSE
Clipped = 8
Total_Scans = 8

Relaxation_Delay = 4[s]
Recvr_Gain = 32
Temp_Get = 21.8[dC]
X_90_Width = 7.67[us]
X_Acq_Time = 1.99874592[s]
X_Angle = 45[deg]
X_Attn = 7.4[dB]
X_Data_Points = 32768
X_Points_Default = 31282
X_Pulse = 3.895[us]
Irr_Mode = Off
Tri_Mode = Off
Dante_Loop = 400
```

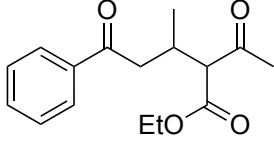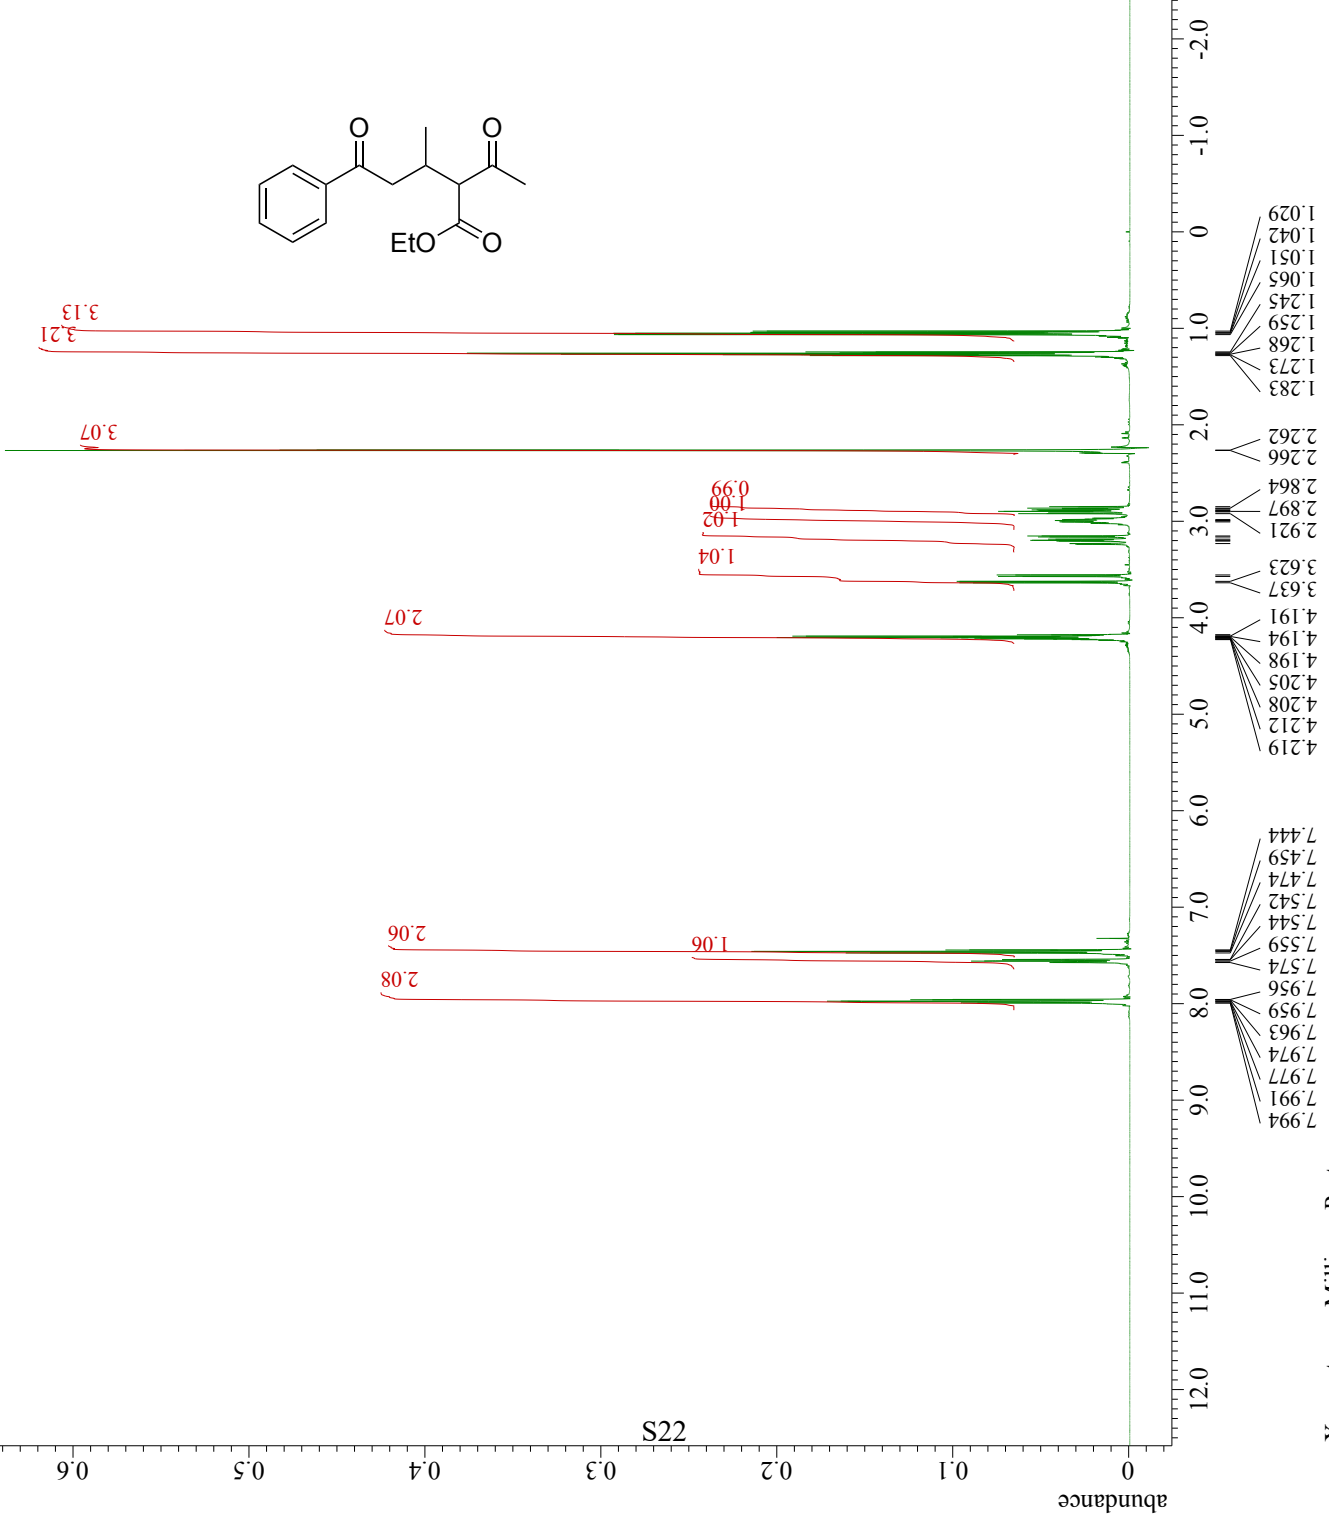

X : parts per Million : Proton

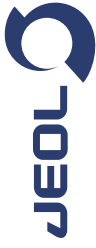

---- PROCESSING PARAMETERS ----  
sexp( 1.00646[Hz], 0.0[s] )  
trapezoid( 0[%], 0[%], 80[%], 100[%] )  
zerofill( 2, TRUE )  
fft( 1, TRUE, TRUE )  
machinephase  
ppm  
thresh( 5[%], 1 )  
peak\_pick( 0[Hz], 0.1[ppm], Peaks, 0[Hz] )  
reference( 77.24389[ppm], 77[ppm] )

Filename = R00471-dry\_CAR  
Author = delta  
Experiment = carbon\_jxp  
Sample\_Id = R00471-dry  
Solvent = CHLOROFORM-D  
Actual\_Start\_Time = 2-MAR-2024 12  
Revision\_Time = 2-MAR-2024 22  
Data\_Format = 1D COMPLEX  
Dim\_Size = 104858  
X\_Domain = Carbon13  
Dim\_Title = Carbon13  
Dim\_Units = [ppm]  
Dimensions = X  
Site = JNM-ECZ500R/M3  
Spectrometer = JNM-ECZ500R/M3  
Field\_Strength = 11.7473579[T]  
X\_Acq\_Duration = 0.99357984[s]  
X\_Domain = Carbon13  
X\_Freq = 125.76529768[M]  
X\_Offset = 100[ppm]  
X\_Points = 39303  
X\_Points\_Input = 31442  
X\_Prescans = 4  
X\_Resolution = 1.00646164[Hz]  
X\_Sweep = 39.55696203[kH]  
X\_Sweep\_Clippped = 31.64556962[kH]  
X\_Sweep\_Input = 251.0[ppm]  
Irr\_Domain = Proton  
Irr\_Freq = 500.15991521[M]  
Irr\_Offset = 5.0[ppm]  
Blanking = FALSE  
Clipped = FALSE  
Scans = 123  
Total\_Scans = 123  
Relaxation\_Delay = 2[s]  
Recvr\_Gain = 52  
Temp\_Get = 21.8[dc]  
X\_90\_Width = 12.19[us]  
X\_Acq\_Time = 0.99357984[s]  
X\_Angle = 30[deg]  
X\_Atn = 11.5[db]  
X\_Data\_Points = 32768  
X\_Pulse\_Default = 4.06333333[us]  
Irr\_Atn\_Dec = 29[db]  
Irr\_Atn\_Dec\_Calc = 29[db]  
Irr\_Atn\_Noise = 29[db]  
Irr\_Bandwidth = 5.97826087[kHz]  
Irr\_Bandwidth\_Ppm = 11.9526989[ppm]  
Irr\_Corresp\_Fw90 = 92[us]

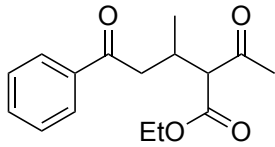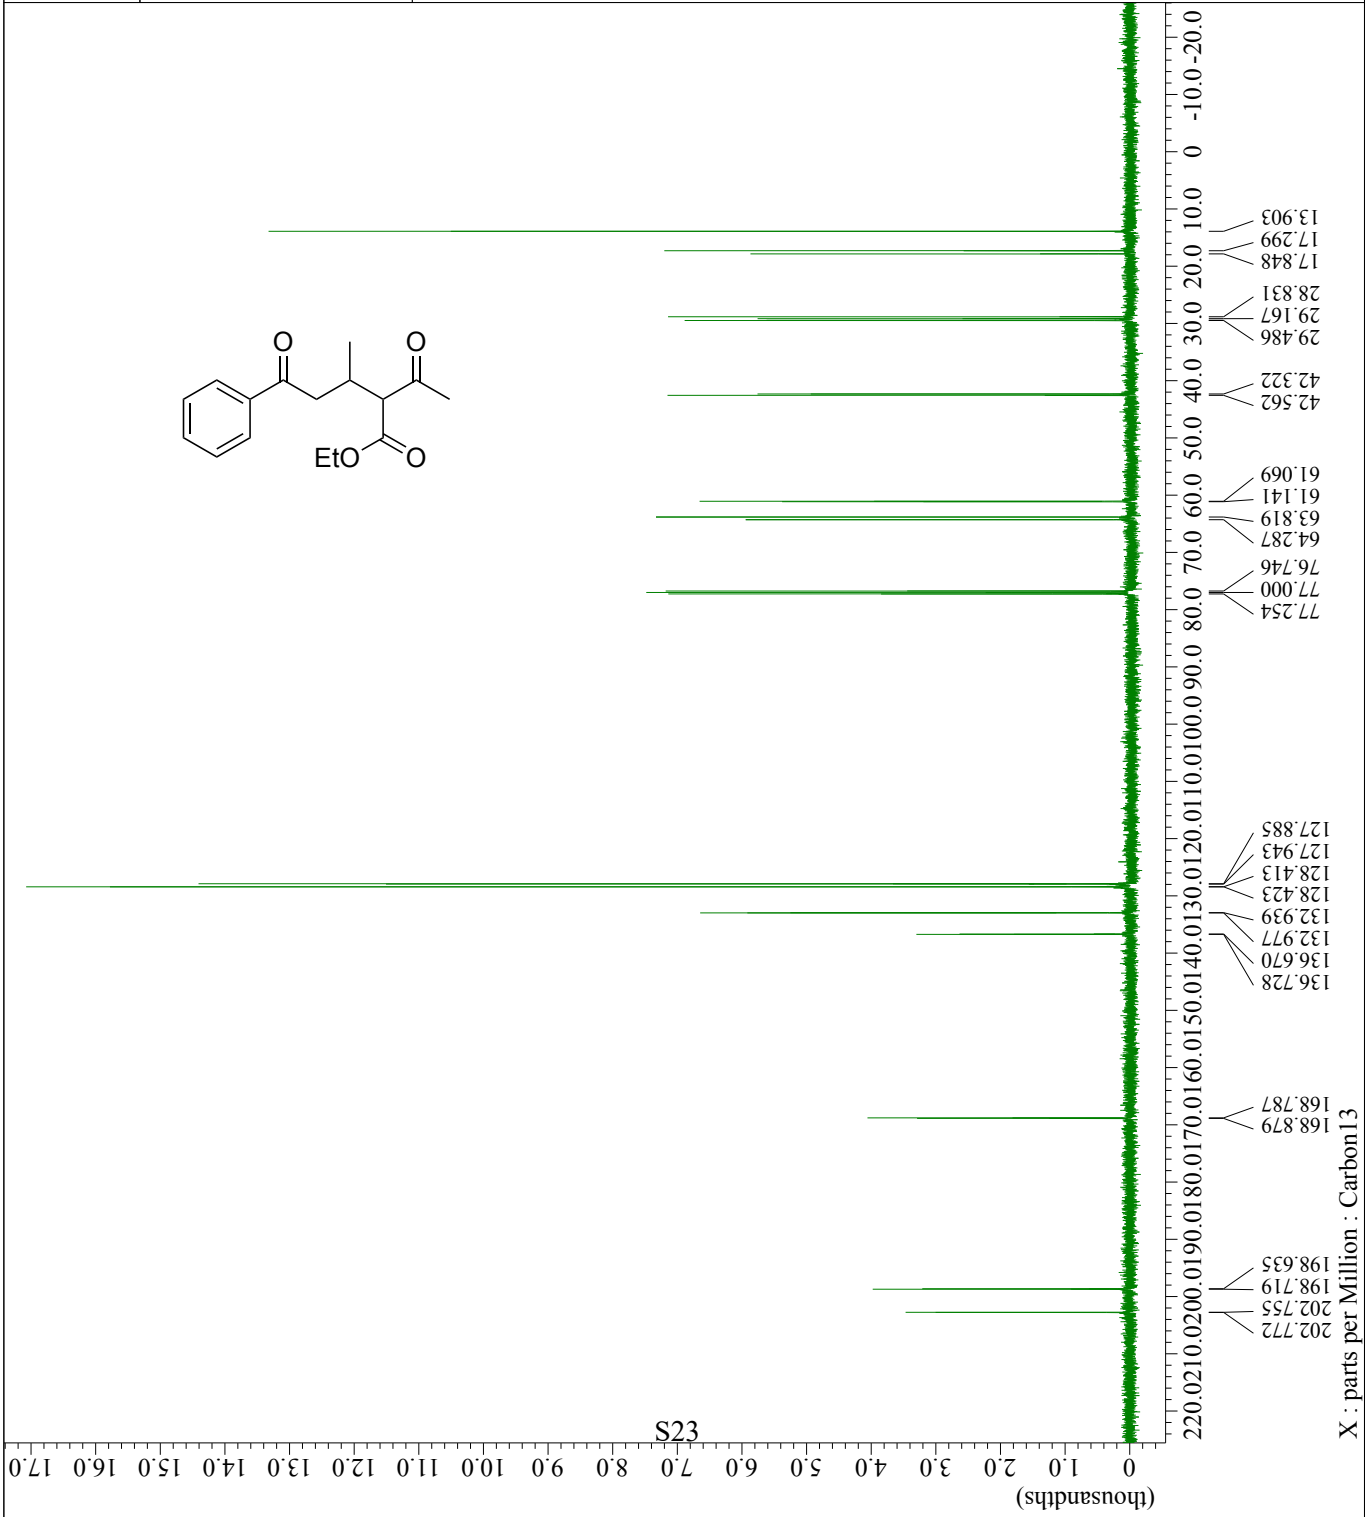

X : parts per Million : Carbon13

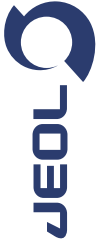

---- PROCESSING PARAMETERS ----  
sexp( 0.25016[Hz], 0.0[s] )  
trapezoid( 0[%], 0[%], 80[%], 100[%] )  
zerofill( 2, TRUE )  
fft( 1, TRUE, TRUE )  
machinephase  
ppm  
phase( 0.12506, 6.75547, 58.32189[°] )  
reference( -0.10668[ppm], 0[ppm] )

Filename = RO0502-purifie  
Author = delta  
Experiment = single\_pulse.j  
Sample\_Id = RO0502-purifie  
Solvent = CHLOROFORM-D  
Actual\_Start\_Time = 17-APR-2024 19  
Revision\_Time = 22-APR-2024 17  
Data\_Format = 1D COMPLEX  
Dim\_Size = 5249  
X\_Domain = Proton  
Dim\_Title = Proton  
Dim\_Units = [ppm]  
Dimensions = X  
Site = JNM-ECZ500R/M3  
Spectrometer = JNM-ECZ500R/M3  
Field\_Strength = 11.7473579[T]  
X\_Acq\_Duration = 1.99874592[s]  
X\_Domain = Proton  
X\_Freq = 500.15991521[M]  
X\_Offset = 5.0[ppm]  
X\_Points = 18757  
X\_Points\_Input = 15005  
X\_Prescans = 0  
X\_Resolution = 0.50031372[Hz]  
X\_Sweep = 9.38438438[kHz]  
X\_Sweep\_Clippped = 7.50750751[kHz]  
X\_Sweep\_Input = 15[ppm]  
Irr\_Domain = Proton  
Irr\_Freq = 500.15991521[M]  
Irr\_Offset = 5.0[ppm]  
Tri\_Domain = Proton  
Tri\_Freq = 500.15991521[M]  
Tri\_Offset = 5.0[ppm]  
Blanking = 2[us]  
Clipped = FALSE  
Scans = 8  
Total\_Scans = 8  
Relaxation\_Delay = 4[s]  
Recvr\_Gain = 32  
Temp\_Get = 22.9[dC]  
X\_90\_Width = 14[us]  
X\_Acq\_Time = 1.99874592[s]  
X\_Angle = 45[deg]  
X\_Atn = 8[dB]  
X\_Data\_Points = 32768  
X\_Points\_Default = 31282  
X\_Pulse = 7[us]  
Irr\_Mode = Off  
Dante\_Loop = 400

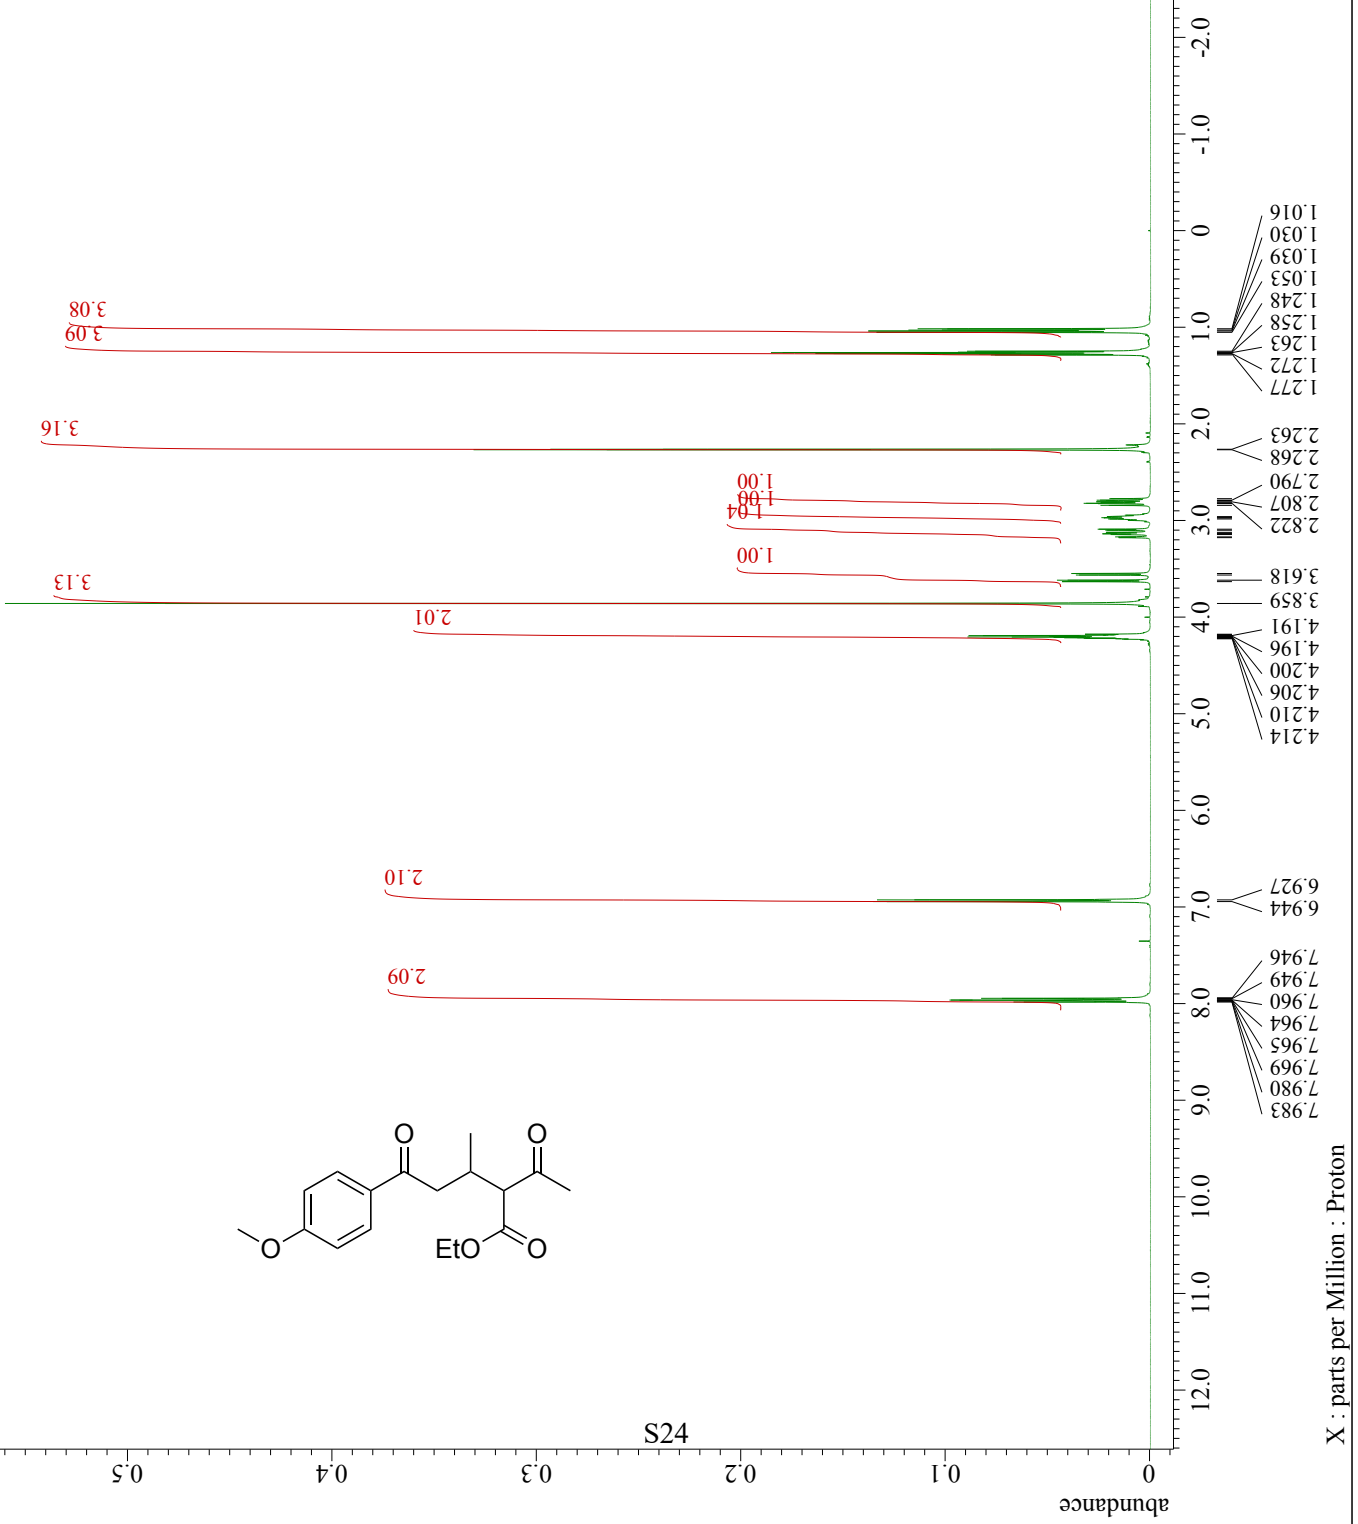

X : parts per Million : Proton



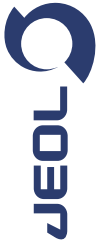

---- PROCESSING PARAMETERS ----

sexp( 1.00646[Hz], 0.0[s] )  
trapezoid( 0[%], 0[%], 80[%], 100[%] )  
zerofill( 2, TRUE )  
fft( 1, TRUE, TRUE )  
machinephase  
ppm  
thresh( 5[%], 1 )  
peak\_pick( 0[Hz], 0.1[ppm], peaks, 0[Hz] )  
reference( 77.25829[ppm], 0[ppm] )  
reference( 0.0[ppm], 77[ppm] )

以下に由来 : : R00474-dry\_carbon-1-1.jdf

Filename = R00474-dry\_CAR  
Author = delta  
Experiment = carbon.jxp  
Sample Id = R00474-dry  
Solvent = CHLOROFORM-D  
Actual Start Time = 1-MAR-2024 17  
Revision\_Time = 13-APR-2024 18  
Data\_Format = 1D COMPLEX  
Dim\_Size = 104858  
X\_Domain = Carbon13  
Dim Title = Carbon13  
Dim Units = [ppm]  
Dimensions = X  
Site = JNM-ECZ500R/M3  
Spectrometer = JNM-ECZ500E/M3  
Field Strength = 11.7473579[T]  
X\_Acq\_Duration = 0.99357984[s]  
X\_Domain = Carbon13  
X\_Freq = 125.76529768[M]  
X\_Offset = 100[ppm]  
X\_Points\_Input = 39303  
X\_Prescans = 31442  
X\_Resolution = 4  
X\_Sweep = 1.00646164[Hz]  
X\_Sweep\_Clipped = 39.55696203[kH]  
X\_Sweep\_Input = 31.64556962[kH]  
Irr\_Domain = 251.0[ppm]  
Irr\_Freq = Proton  
Irr\_Offset = 500.15991521[M]  
Blanking = 5.0[us]  
Clipped = FALSE  
Scans = 109  
Total\_Scans = 109  
Relaxation\_Delay = 2[s]  
Recvr\_Gain = 52  
Temp\_Get = 22.1[dc]  
X\_90\_Width = 12.19[us]  
X\_Acq\_Time = 0.99357984[s]  
X\_Angle = 30[deg]  
X\_Atn = 11.5[db]  
X\_Data\_Points = 32768  
X\_Pulse\_Default = 39557  
Irr\_Atn\_Dec = 4.06333333[us]  
Irr\_Atn\_Dec\_Calc = 29[db]  
Irr\_Atn\_Noise = 29[db]  
Irr\_Bandwidth = 5.97826087[kHz]  
Irr\_Bandwidth\_Ppm = 11.9526989[ppm]  
Irr\_Corresp\_Pw90 = 92[us]

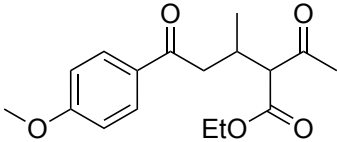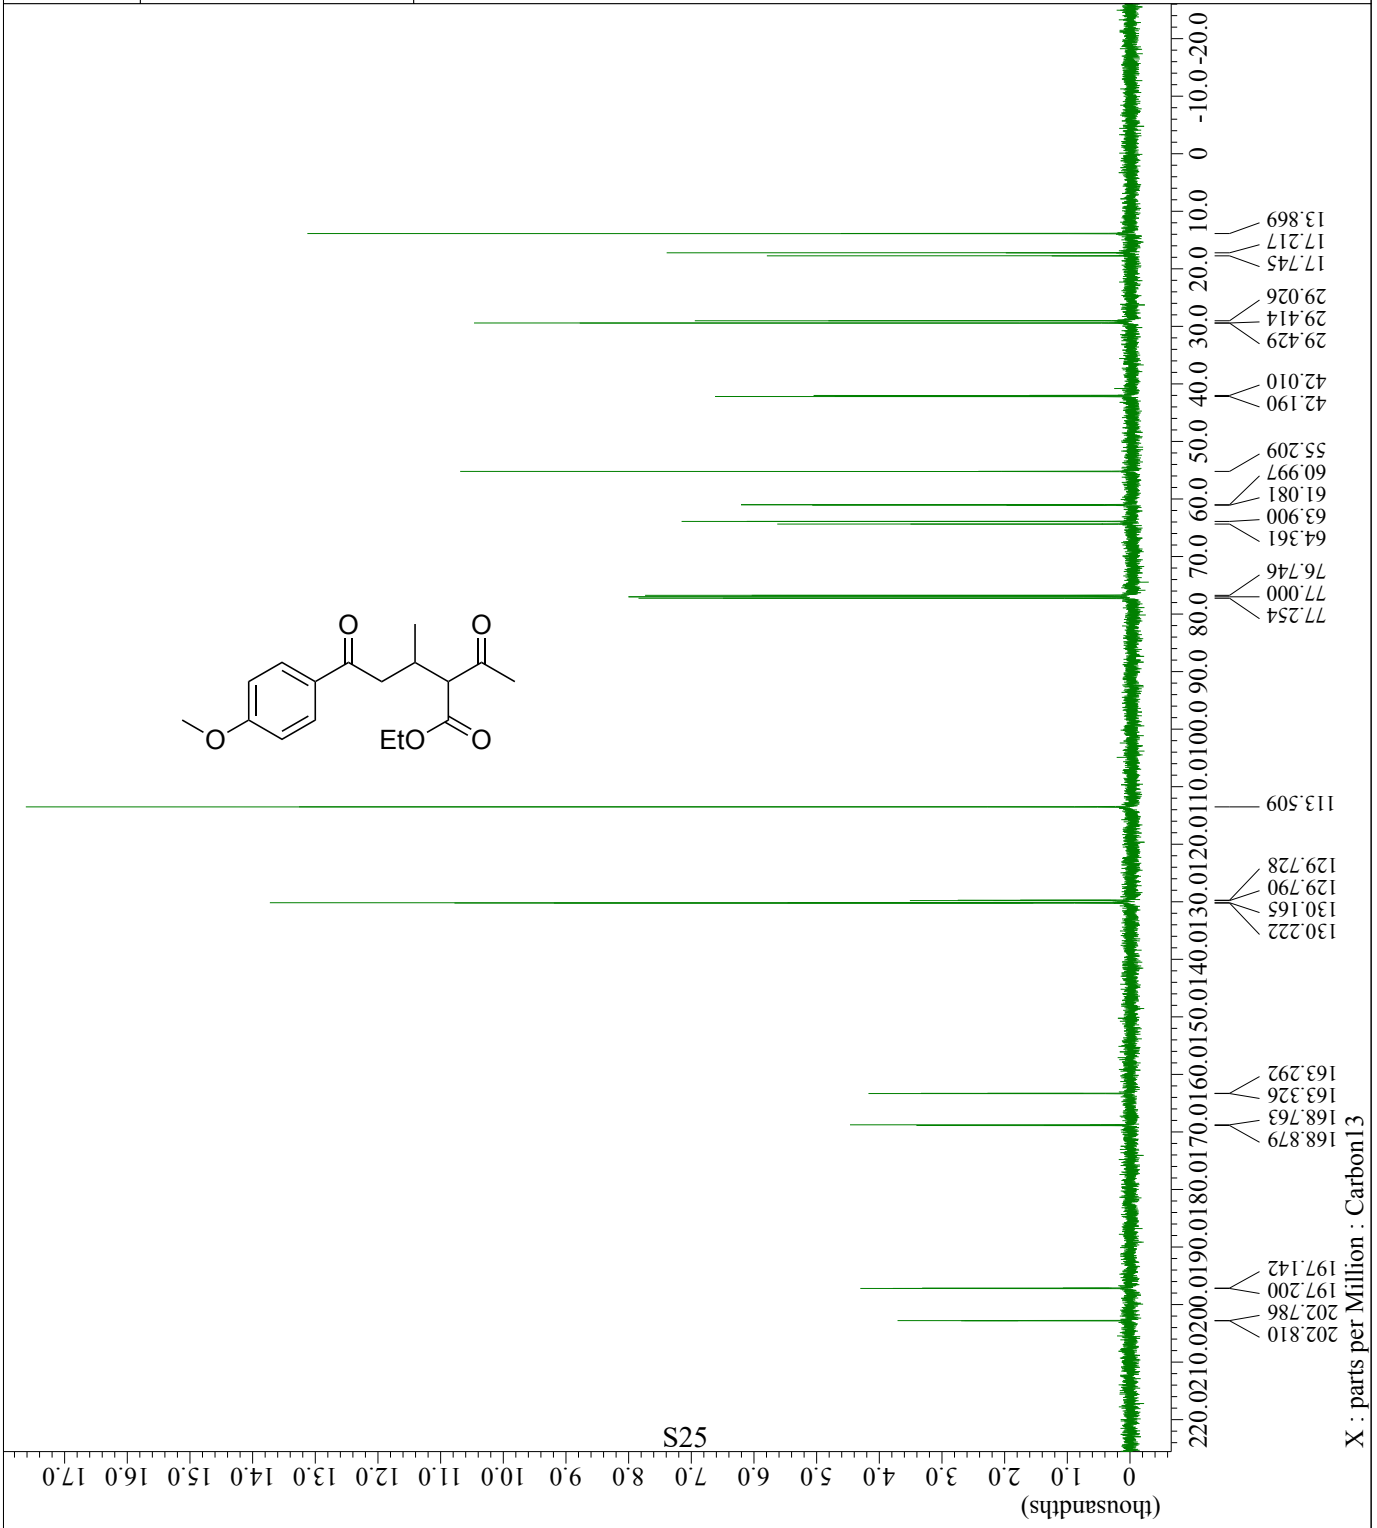

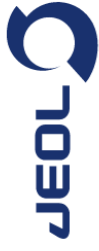

----- PROCESSING PARAMETERS -----  
sexp( 0.25016[Hz], 0.0[s] )  
trapezoid( 0[%], 0[%], 80[%], 100[%] )  
zerofill( 2, TRUE )  
fft( 1, TRUE, TRUE )  
machinephase  
ppm  
reference( -0.02595[ppm], 0[ppm] )  
thresh( 5.92287[%], 1 )

以下に由来 : RO0491-purified-3\_PROTON-1-1.jdf

Filename = RO0491-purifie  
Author = delta  
Experiment = single\_pulse.j  
Sample Id = RO0491-purifie  
Solvent = CHLOROFORM-D  
Actual\_Start\_Time = 10-MAY-2024 15  
Revision\_Time = 11-MAY-2024 18  
Data\_Format = 1D COMPLEX  
Dim\_Size = 52429  
X\_Domain = Proton  
Dim\_Title = Proton  
Dim\_Units = [ppm]  
Dimensions = X  
Site = JNM-ECZ500R/M3  
Spectrometer = JNM-ECZ500R/M3  
Field\_Strength = 11.7473579[T]  
X\_Acq\_Duration = 1.99874592[s]  
X\_Domain = Proton  
X\_Freq = 500.15991521[M]  
X\_Offset = 18757  
X\_Points = 15005  
X\_Points\_Input = 0  
X\_Prescans = 0  
X\_Resolution = 0.50031372[Hz]  
X\_Sweep = 9.38438438[kHz]  
X\_Sweep\_Clippped = 7.50750751[kHz]  
X\_Sweep\_Input = 15[ppm]  
Irr\_Domain = Proton  
Irr\_Freq = 500.15991521[M]  
Irr\_Offset = 5.0[ppm]  
Irr\_Domain = Proton  
Tri\_Freq = 500.15991521[M]  
Tri\_Offset = 2[us]  
Blanking = FALSE  
Clipped = FALSE  
Scans = 8  
Total\_Scans = 8  
Relaxation\_Delay = 4[s]  
Recvr\_Gain = 42  
Temp\_Get = 22.8[dc]  
X\_90\_Width = 14.8[us]  
X\_Acq\_Time = 1.99874592[s]  
X\_Angle = 45[deg]  
X\_Attn = 8[db]  
X\_Data\_Points = 32768  
X\_Points\_Default = 31282  
X\_Pulse = 7.4[us]  
Irr\_Mode = Off  
Tri\_Mode = Off  
Dante\_Loop = 400

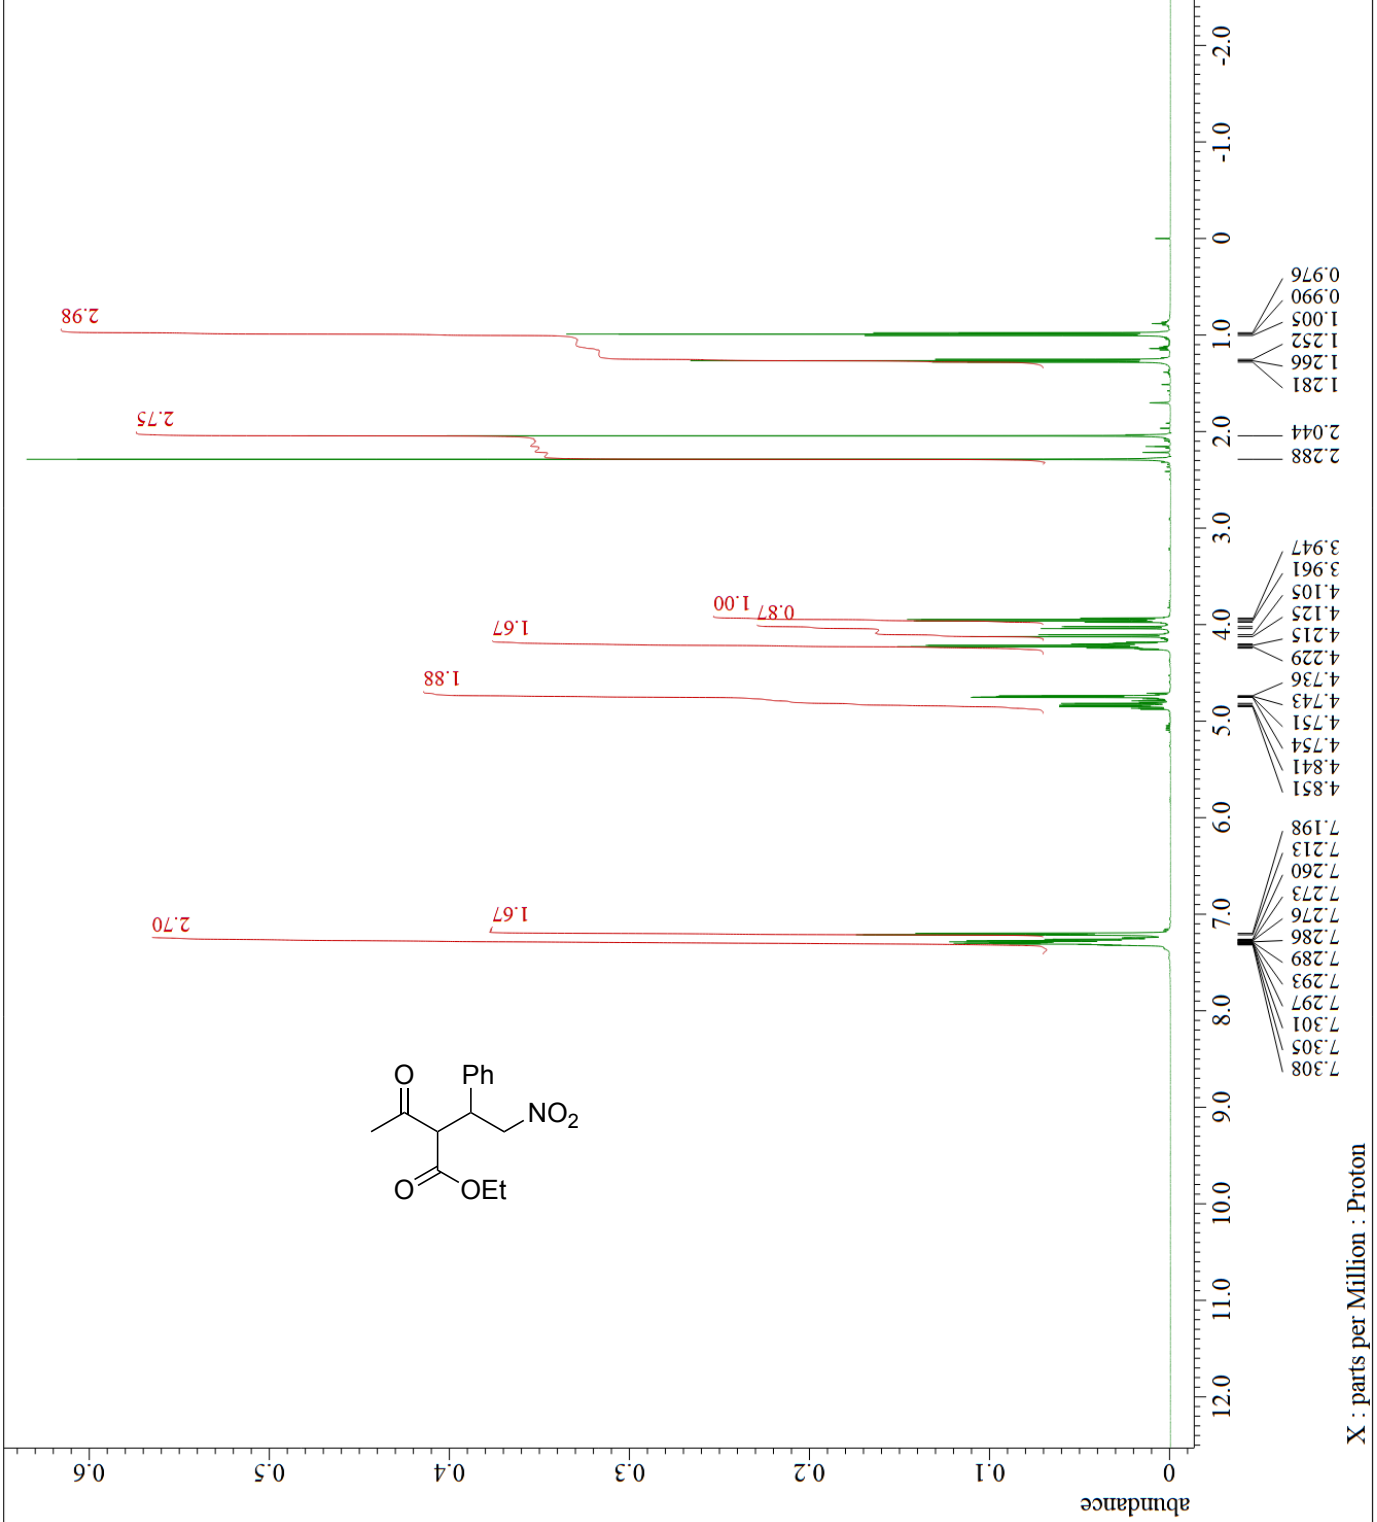

X : parts per Million : Proton

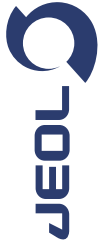

----- PROCESSING PARAMETERS -----

```
sexp( 1.00646[Hz], 0.0[us] )  
trapezoid( 0[%], 0[%], 80[%], 100[%] )  
zerofill( 2, TRUE )  
fft( 1, TRUE, TRUE )  
machinephase  
ppm  
thresh( 5[%], 1 )  
peak_pick( 0[Hz], 0.1[ppm], Peaks, 0[Hz] )  
referenc( 77.1911[ppm], 77[ppm] )  
thresh( 7.72221[%], 6.33611[%] )
```

以下に由来 : RO0484-dry2\_carbon-1-1-.jdf

```
Filename = RO0484-dry2_CA  
Author = delta  
Experiment = carbon.jxp  
Sample Id = RO0484-dry2  
Solvent = CHLOROFORM-D  
Actual_Start_Time = 13-MAR-2024 09  
Revision_Time = 12-APR-2024 16  
Data_Format = 1D COMPLEX  
Dim_Size = 104858  
X_Domain = Carbon13  
Dim_Title = Carbon13  
Dim_Units = [ppm]  
Dimensions = X  
Site = JNM-ECZ500R/M3  
Spectrometer = JNM-ECZ500R/M3  
Field_Strength = 11.7473579[T]  
X_Acq_Duration = 0.99357984[s]  
X_Domain = Carbon13  
X_Freq = 125.76529768[M]  
X_Offset = 100[ppm]  
X_Points = 39303  
X_Points_Input = 31442  
X_Prescans = 4  
X_Resolution = 1.00646164[Hz]  
X_Sweep = 39.55696203[kH]  
X_Sweep_Clippped = 31.64556962[kH]  
X_Sweep_Input = 251.0[ppm]  
Irr_Domain = Proton  
Irr_Freq = 500.15991521[M]  
Irr_Offset = 5.0[ppm]  
Blanking = FALSE  
Clipped = 256  
Total_Scans = 256  
Relaxation_Delay = 2[s]  
Recvr_Gain = 52  
Temp_Get = 22[dc]  
X_90_Width = 12.19[us]  
X_Acq_Time = 0.99357984[s]  
X_Angle = 30[deg]  
X_Attn = 11.5[db]  
X_Data_Points = 32768  
X_Points_Default = 39557  
X_Pulse_Default = 4.063333333[us]  
Irr_Atn_Dec = 29[db]  
Irr_Atn_Noise = 29[db]  
Irr_Atn_Noise_Calc = 29[db]  
Irr_Bandwidth = 5.97826087[kHz]  
Irr_Bandwidth_Ppm = 11.9526989[ppm]  
Irr_Corresp_Pw90 = 92[us]
```

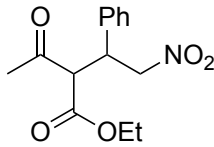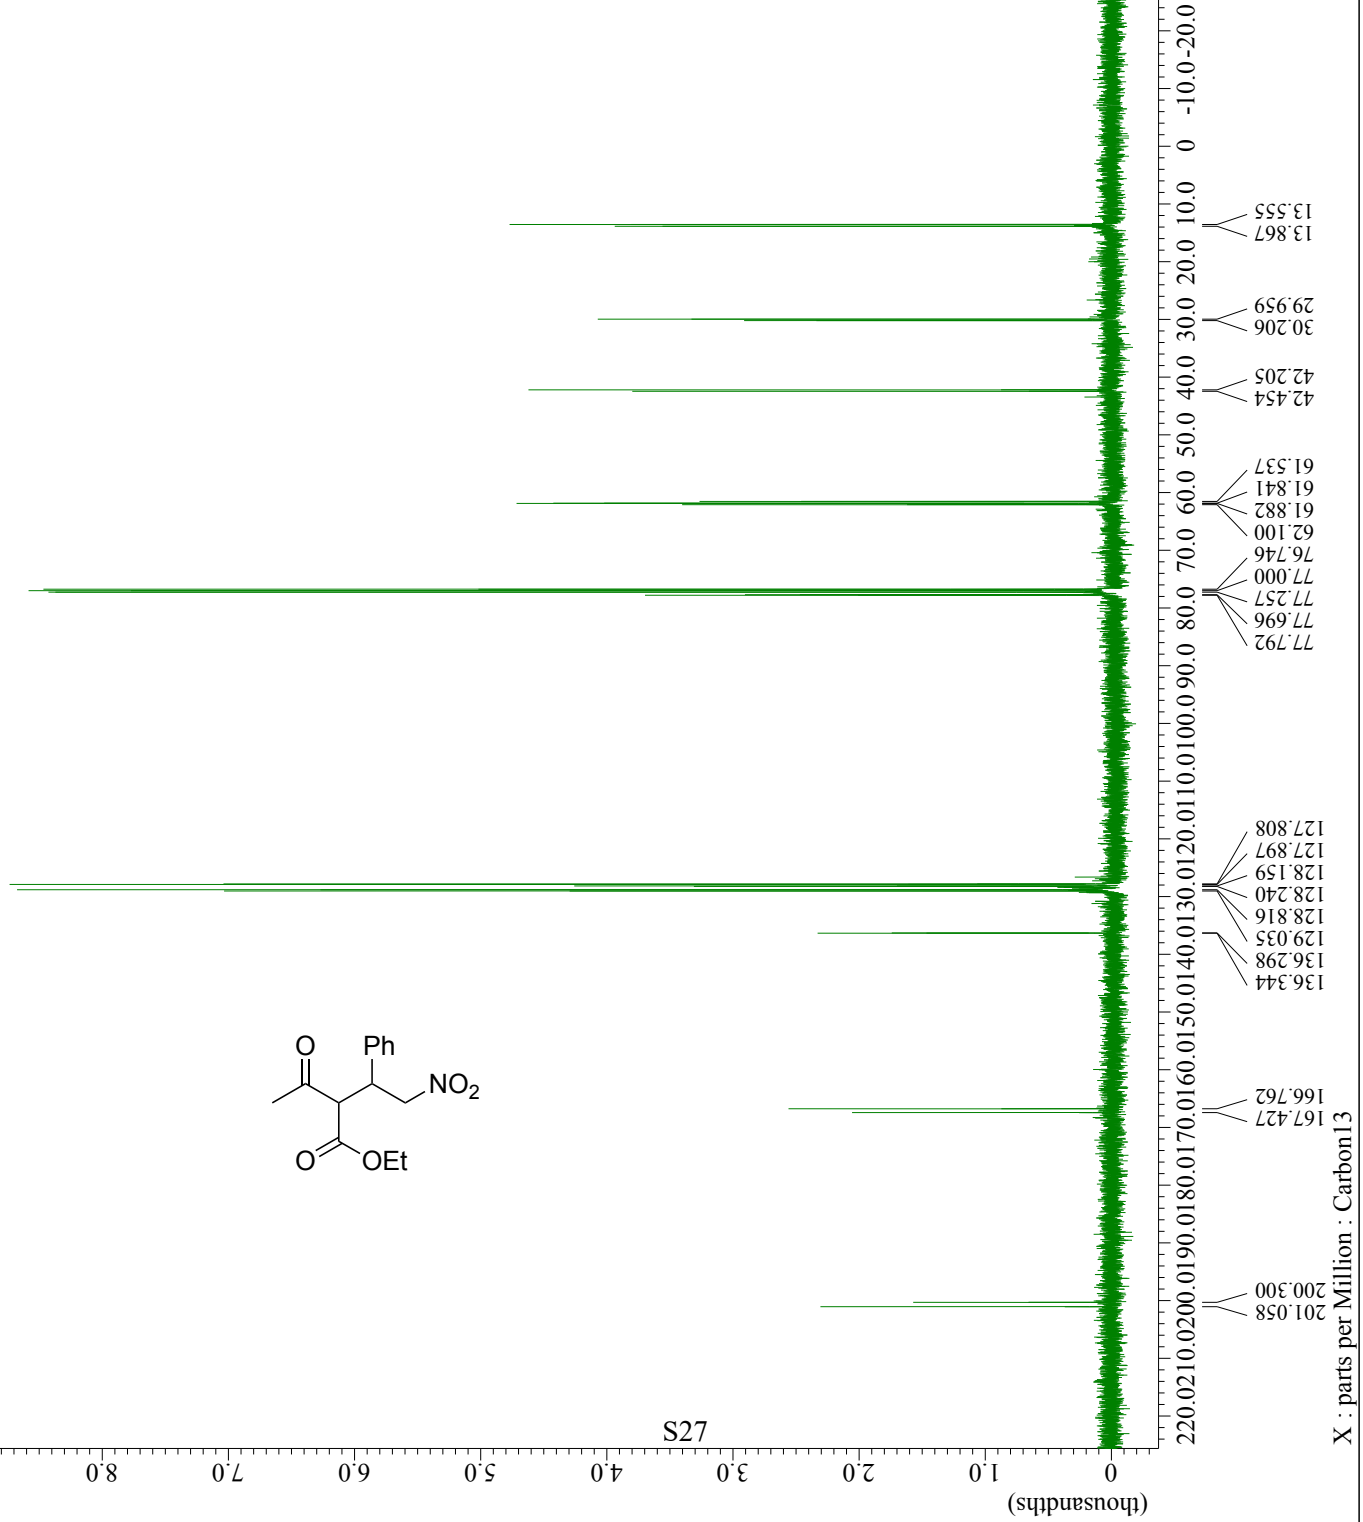

X : parts per Million : Carbon13

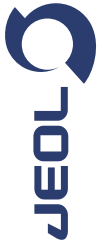

---- PROCESSING PARAMETERS ----

sexp( 0.25016[Hz] 0.0[s] )  
trapezoid( 0[%], 0[%], 80[%], 100[%] )  
zerofill( 2, TRUE )  
fft( 1, TRUE, TRUE )  
machinephase  
ppm  
reference( -0.07261[ppm], 0[ppm] )  
thresh( 2.2627[%], 1 )

Filename = R00480-dry\_PRO  
Author = delta  
Experiment = single\_pulse.j  
Sample\_Id = R00480-dry  
Solvent = NONE  
Actual\_Start\_Time = 1-MAR-2024 10  
Revision\_Time = 23-APR-2024 20  
Data\_Format = 1D\_COMPLEX  
Dim\_Size = 52429  
X\_Domain = Proton  
Dim\_Title = Proton  
Dim\_Units = [ppm]  
Dimensions = X  
Site = JNM-ECZ500R/M3  
Spectrometer = JNM-ECZ500R/M3  
Field\_Strength = 11.7473579[T]  
X\_Acq\_Duration = 1.99874592[s]  
X\_Domain = Proton  
X\_Freq = 500.15991521[M]  
X\_Offset = 5.0[ppm]  
X\_Points = 18757  
X\_Points\_Input = 15005  
X\_Prescans = 0  
X\_Resolution = 0.50031372[Hz]  
X\_Sweep = 9.38438438[kHz]  
X\_Sweep\_Clippped = 7.50750751[kHz]  
X\_Sweep\_Input = 15[ppm]  
Irr\_Domain = Proton  
Irr\_Freq = 500.15991521[M]  
Irr\_Offset = 5.0[ppm]  
Tri\_Domain = Proton  
Tri\_Freq = 500.15991521[M]  
Tri\_Offset = 5.0[ppm]  
Blanking = FALSE  
Clipped = FALSE  
Scans = 8  
Total\_Scans = 8  
Relaxation\_Delay = 4[s]  
Recvr\_Gain = 32  
Temp\_Get = 22[dc]  
X\_90\_Width = 7.67[us]  
X\_Acq\_Time = 1.99874592[s]  
X\_Angle = 45[deg]  
X\_Atn = 7.4[db]  
X\_Data\_Points = 31282  
X\_Points\_Default = 32768  
X\_Pulse = 3.835[us]  
Irr\_Mode = Off  
Tri\_Mode = Off  
Dante\_Loop = 400

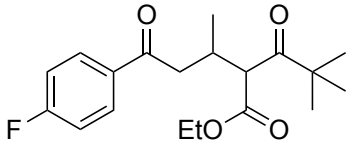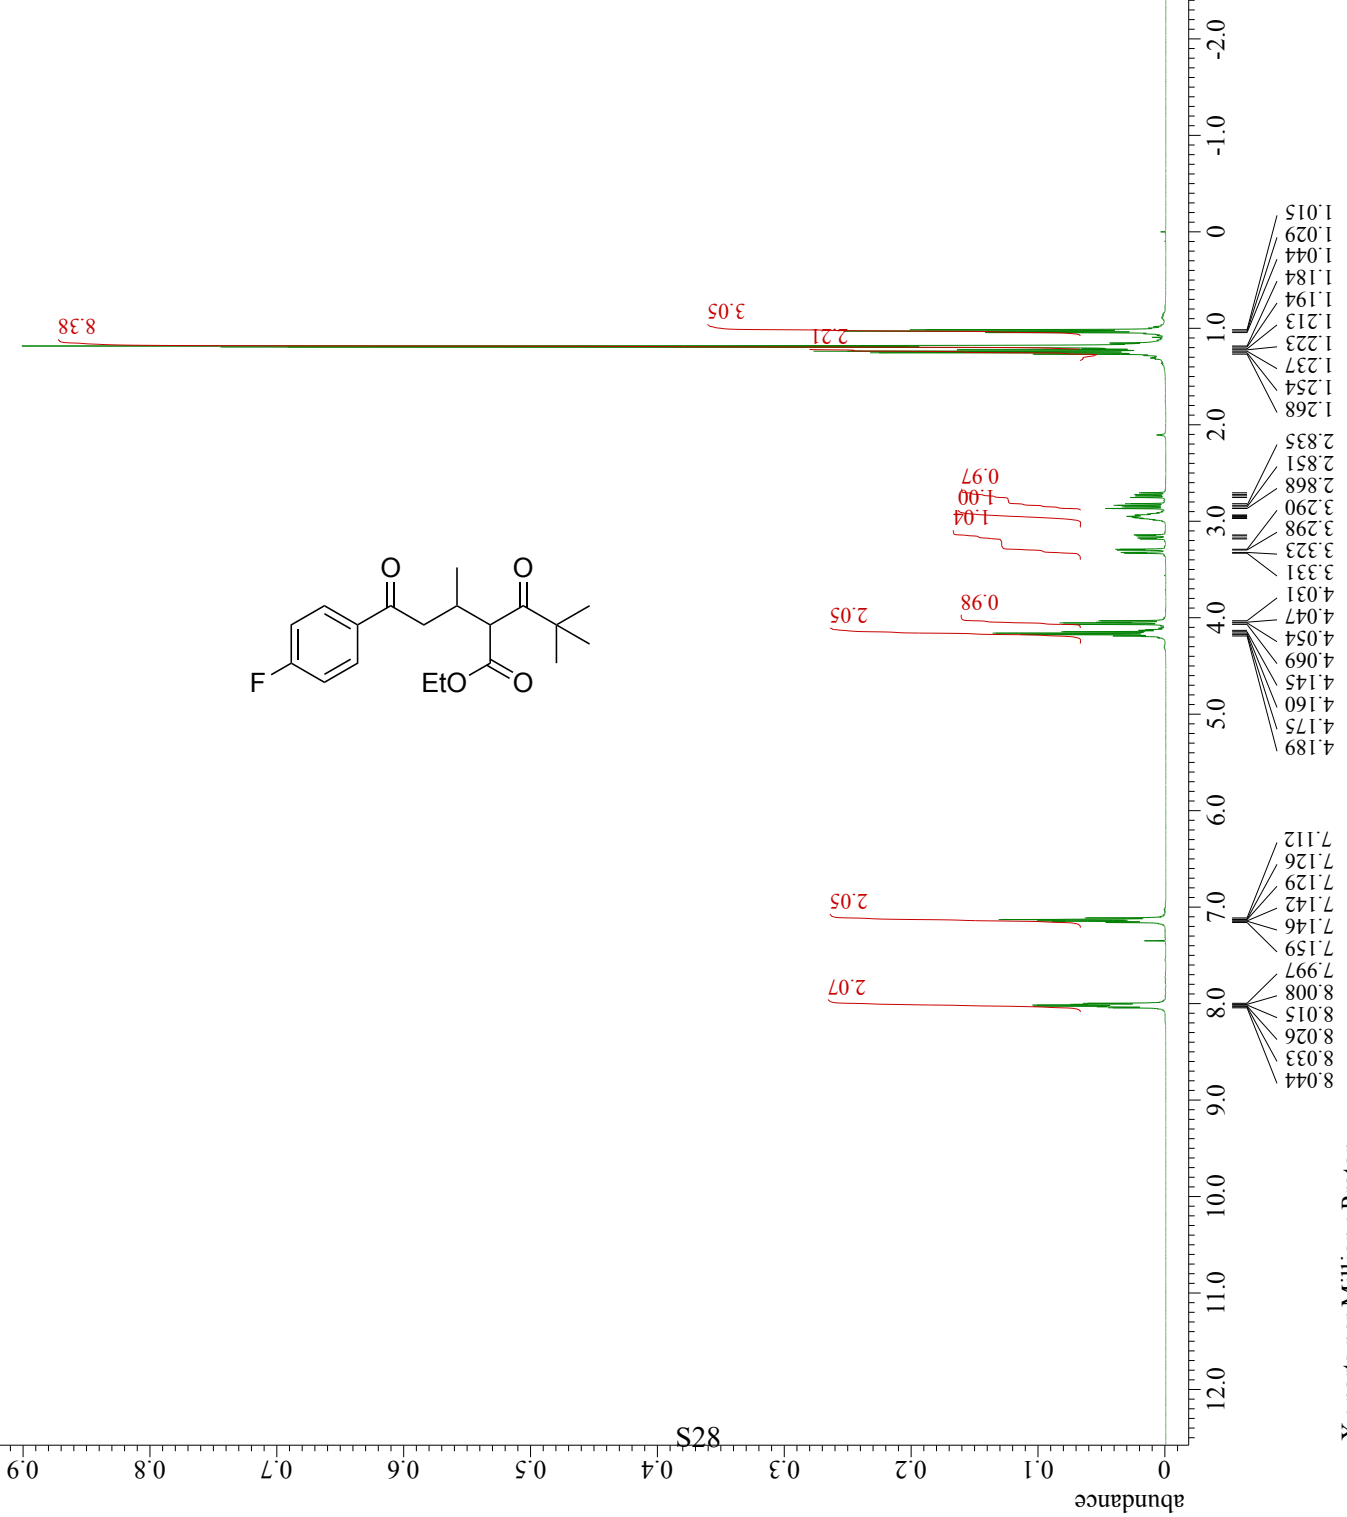

X : parts per Million : Proton

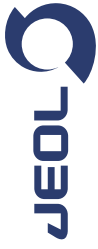

---- PROCESSING PARAMETERS ----

sexp( 1.00646[Hz], 0.0[is] )  
trapezoid( 0[%], 0[%], 80[%], 100[%] )  
zerofill( 2, TRUE )  
fft( 1, TRUE, TRUE )  
machinephase  
ppm  
thresh( 5[%], 1 )  
peak\_pick( 0[Hz], 0.1[ppm], Peaks, 0[Hz] )  
reference( 77.1983[ppm], 77[ppm] )  
reference( 221.35714[ppm], 77[ppm] )  
reference( -67.3363[ppm], 77[ppm] )  
thresh( 3.05154[%], 1 )

Filename = R00480-dry\_CAR  
Author = delta  
Experiment = carbon.jsp  
Sample Id = R00480-dry  
Solvent = CHLOROFORM-D  
Actual\_Start\_Time = 1-MAR-2024 19  
Revision\_Time = 12-APR-2024 15  
Data\_Format = 1D COMPLEX  
Dim\_Size = 104858  
X\_Domain = Carbon13  
Dim\_Title = Carbon13  
Dim\_Units = [ppm]  
X = X  
Site = JNM-ECZ500R/M3  
Spectrometer = JNM-ECZ500R/M3  
Field\_Strength = 11.7473579[T]  
X\_Acq\_Duration = 0.99357984[s]  
X\_Domain = Carbon13  
X\_Freq = 125.76529768[M]  
X\_Offset = 100[ppm]  
X\_Points = 39303  
X\_Points\_Input = 31442  
X\_Prescans = 4  
X\_Resolution = 1.00646164[Hz]  
X\_Sweep = 39.55696203[kH]  
X\_Sweep\_Clippped = 31.64556962[kH]  
X\_Sweep\_Input = 251.0[ppm]  
Irr\_Domain = Proton  
Irr\_Freq = 500.15991521[M]  
Irr\_Offset = 5.0[ppm]  
Blanking = FALSE  
Clipped = FALSE  
Total\_Scans = 201  
Relaxation\_Delay = 2[s]  
Recvr\_Gain = 52  
Temp\_Get = 22.1[dc]  
X\_90\_Width = 12.19[us]  
X\_Acq\_Time = 0.99357984[s]  
X\_Angle = 30[deg]  
X\_Attn = 11.5[db]  
X\_Data = 32768  
X\_Points = 4.06333333[us]  
X\_Pulse\_Default = 29[db]  
Irr\_Atn\_Dec = 29[db]  
Irr\_Atn\_Dec\_Calc = 29[db]  
Irr\_Atn\_Noise = 29[db]  
Irr\_Bandwidth = 5.97826087[kHz]  
Irr\_Bandwidth\_Ppm = 11.9526989[ppm]  
Irr\_Corresp\_Pw90 = 92[us]

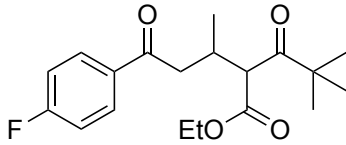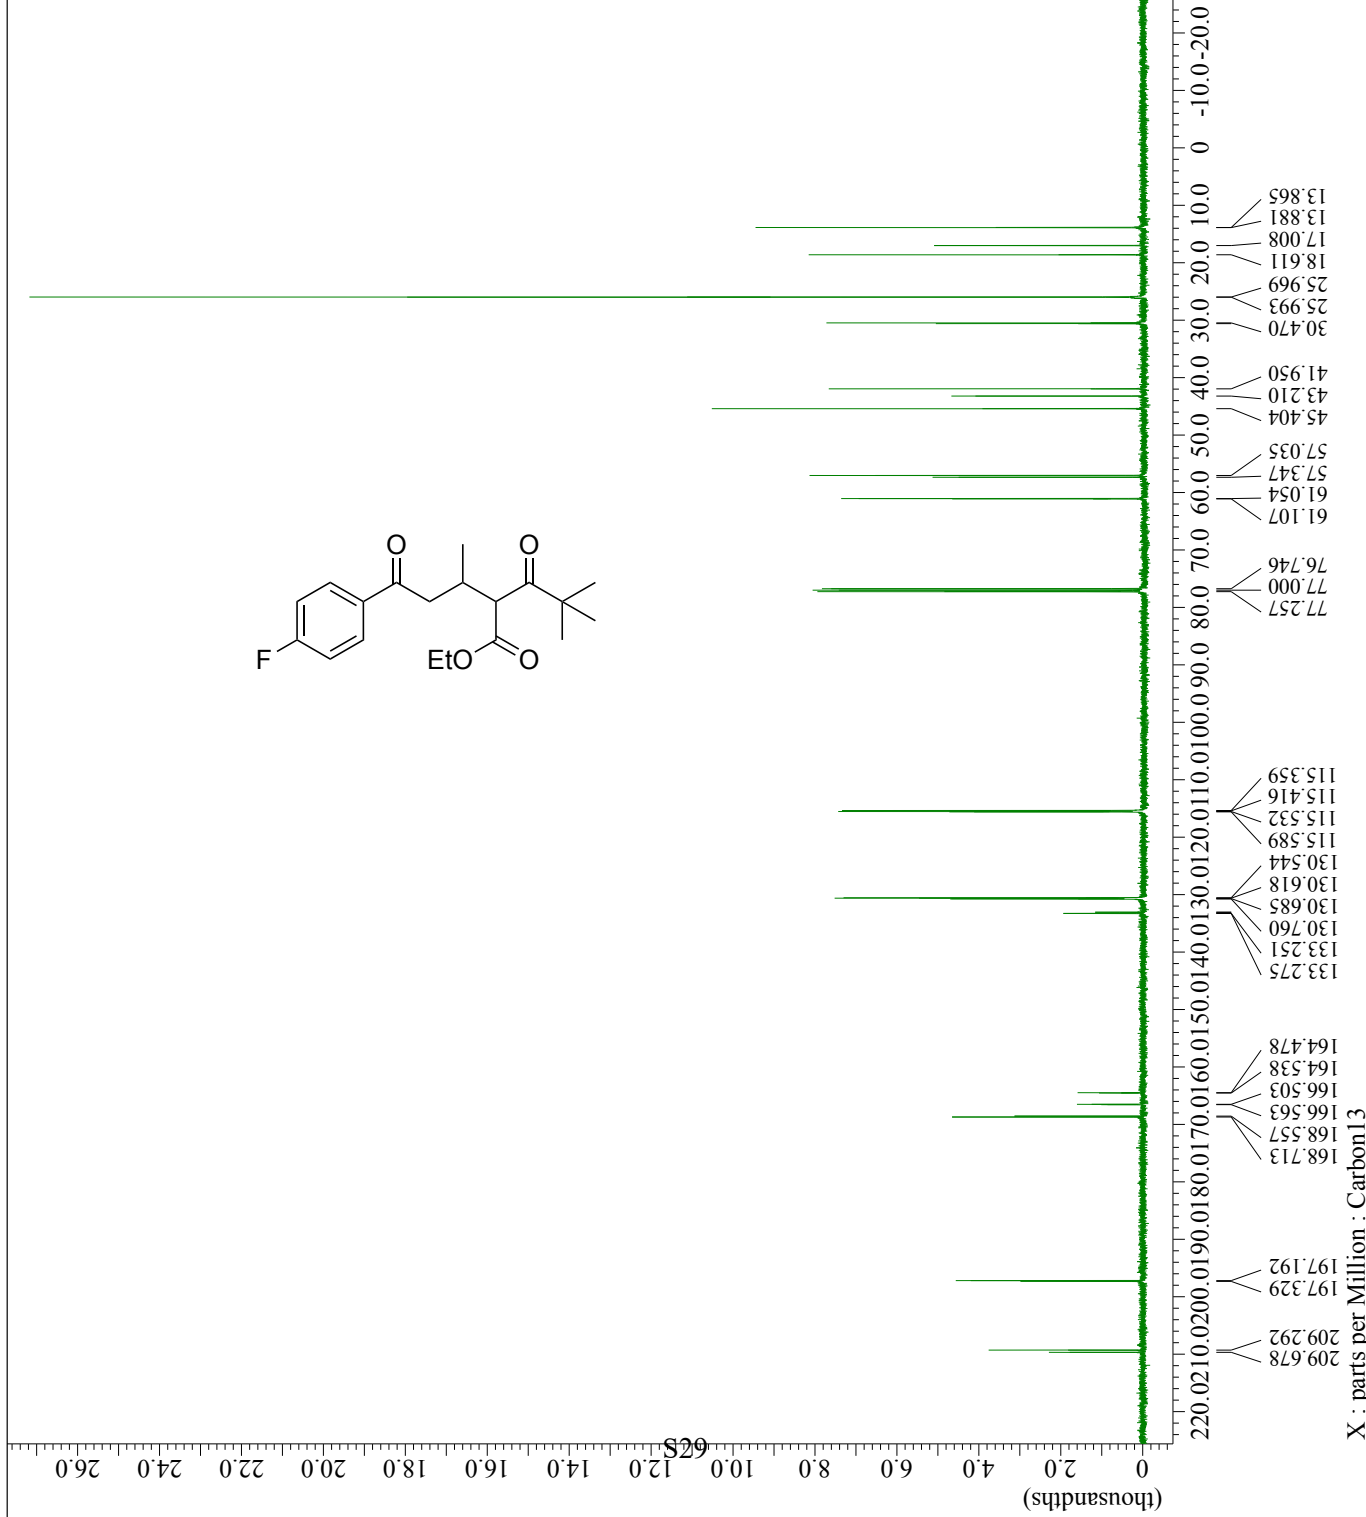

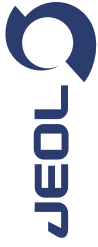

---- PROCESSING PARAMETERS ----

sexp( 0.33488[Hz], 0.0[s] )  
trapezoid( 0[Hz], 0[Hz], 80[Hz], 100[Hz] )  
zerofill( 2, TRUE )  
fft( 1, TRUE, TRUE )  
machinephase  
ppm  
phase( 0.16268, 9.3979, 52.68674[Hz] )  
reference( -62.63939[ppm], -63.72[ppm] )  
thresh( 64.14036[Hz], 1 )

以下に由来: : R00458-purified-2\_Fluorine-1-1.jdf

Filename = R00458-purifie  
Author = delta  
Experiment = single\_pulse.j  
Sample\_Id = R00458-purifie  
Solvent = CHLOROFORM-D  
Actual\_Start\_Time = 22-FEB-2024 10  
Revision\_Time = 23-APR-2024 20  
Data\_Format = 1D\_COMPLEX  
Dim\_Size = 838861  
X\_Domain = Fluorine19  
Dim\_Title = Fluorine19  
Dim\_Units = [ppm]  
Dimensions = X  
Site = JNM-ECZ500R/M3  
Spectrometer = JNM-ECZ500R/M3  
Field\_Strength = 11.7473579[T]  
X\_Acq\_Duration = 2.98610082[s]  
X\_Domain = Fluorine19  
X\_Freq = 470.62046084[M]  
X\_Offset = -100[ppm]  
X\_Points = 352967  
X\_Points\_Input = 282373  
X\_Prescans = 0  
X\_Resolution = 0.33488488[Hz]  
X\_Sweep\_Clippped = 118.20330969[k  
X\_Sweep\_Input = 94.56264775[kH  
Irr\_Domain = Fluorine19  
Irr\_Freq = 470.62046084[M  
Irr\_Offset = 5[ppm]  
Tri\_Domain = Fluorine19  
Tri\_Freq = 470.62046084[M  
Tri\_Offset = 5[ppm]  
Blanking = 2[us]  
Clipped = FALSE  
Scans = 16  
Total\_Scans = 16  
Relaxation\_Delay = 4[us]  
Recvr\_Gain = 62  
Temp\_Get = 23.2[dc]  
X\_90\_Width = 7.45[us]  
X\_Acq\_Time = 2.98610082[s]  
X\_Angle = 45[deg]  
X\_Atn = 7[db]  
X\_Data\_Points = 65536  
X\_Points\_Default = 65536  
X\_Pulse\_Default = 3.725[us]  
Irr\_Mode = Off  
Tri\_Mode = Off  
Dante\_Loop = 400

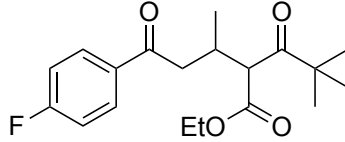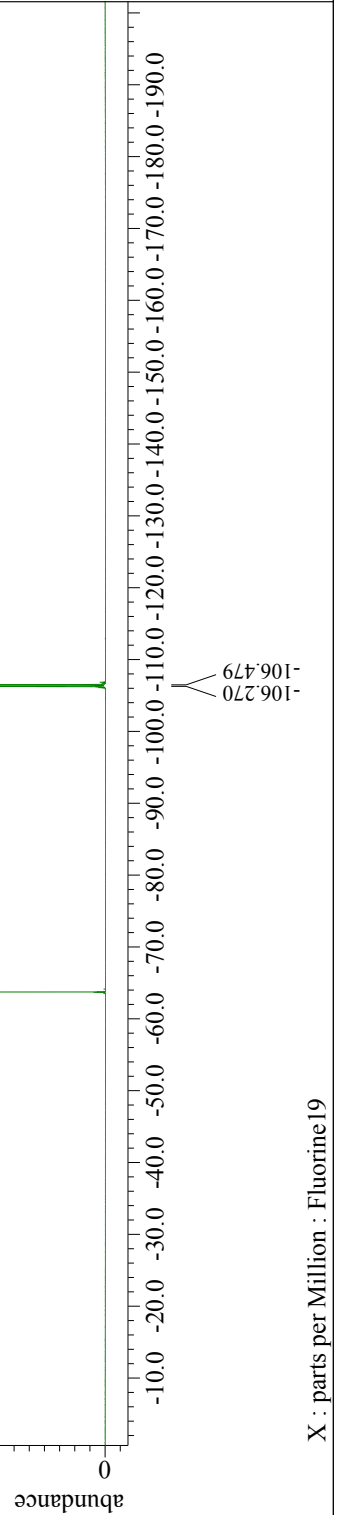

s30

PhCF<sub>3</sub>

-106.270  
-106.479

X : parts per Million : Fluorine19

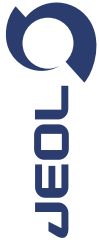

```
---- PROCESSING PARAMETERS ----  
sexp( 0.25016[Hz], 0.0[s] )  
trapezoid( 0[%], 0[%], 80[%], 100[%] )  
zerofill( 2, TRUE )  
fft( 1, TRUE, TRUE )  
machinephase  
ppm  
reference( -0.05715[ppm], 0[ppm] )  
thresh( 6.82713[%], 1 )
```

```
Filename = R00457-purifie  
Author = delta  
Experiment = single_pulse.j  
Sample_Id = R00457-purifie  
Solvent = CHLOROFORM-D  
Actual_Start_Time = 7-MAR-2024 14  
Revision_Time = 22-APR-2024 07
```

```
Data_Format = 1D_COMPLEX  
Dim_Size = 52429  
X_Domain = Proton  
Dim_Title = Proton  
Dim_Units = [ppm]  
Dimensions = X  
Site = JNM-ECZ500R/M3  
Spectrometer = JNM-ECZ500R/M3
```

```
Field_Strength = 11.7473579[T]  
X_Acq_Duration = 1.99874592[s]  
X_Domain = Proton  
X_Freq = 500.15991521[M]  
X_Offset = 5.0[ppm]  
X_Points = 18757  
X_Points_Input = 15005  
X_Prescans = 0  
X_Resolution = 0.50031372[Hz]  
X_Sweep = 9.38438438[kHz]  
X_Sweep_Clippped = 7.50750751[kHz]  
X_Sweep_Input = 15[ppm]  
Irr_Domain = Proton  
Irr_Freq = 500.15991521[M]  
Irr_Offset = 5.0[ppm]  
Tri_Domain = Proton  
Tri_Freq = 500.15991521[M]  
Tri_Offset = 5.0[ppm]  
Blanking = FALSE  
Clipped = FALSE  
Scans = 8  
Total_Scans = 8
```

```
Relaxation_Delay = 4[s]  
Recvr Gain = 32  
Temp Get = 22.2[degC]  
X_90_Width = 7.67[us]  
X_Acq_Time = 1.99874592[s]  
X_Angle = 45[deg]  
X_Atn = 7.4[db]  
X_Data_Points = 32768  
X_Points_Default = 31282  
X_Pulse = 3.835[us]  
Irr_Mode = Off  
Tri_Mode = Off  
Dante_Loop = 400
```

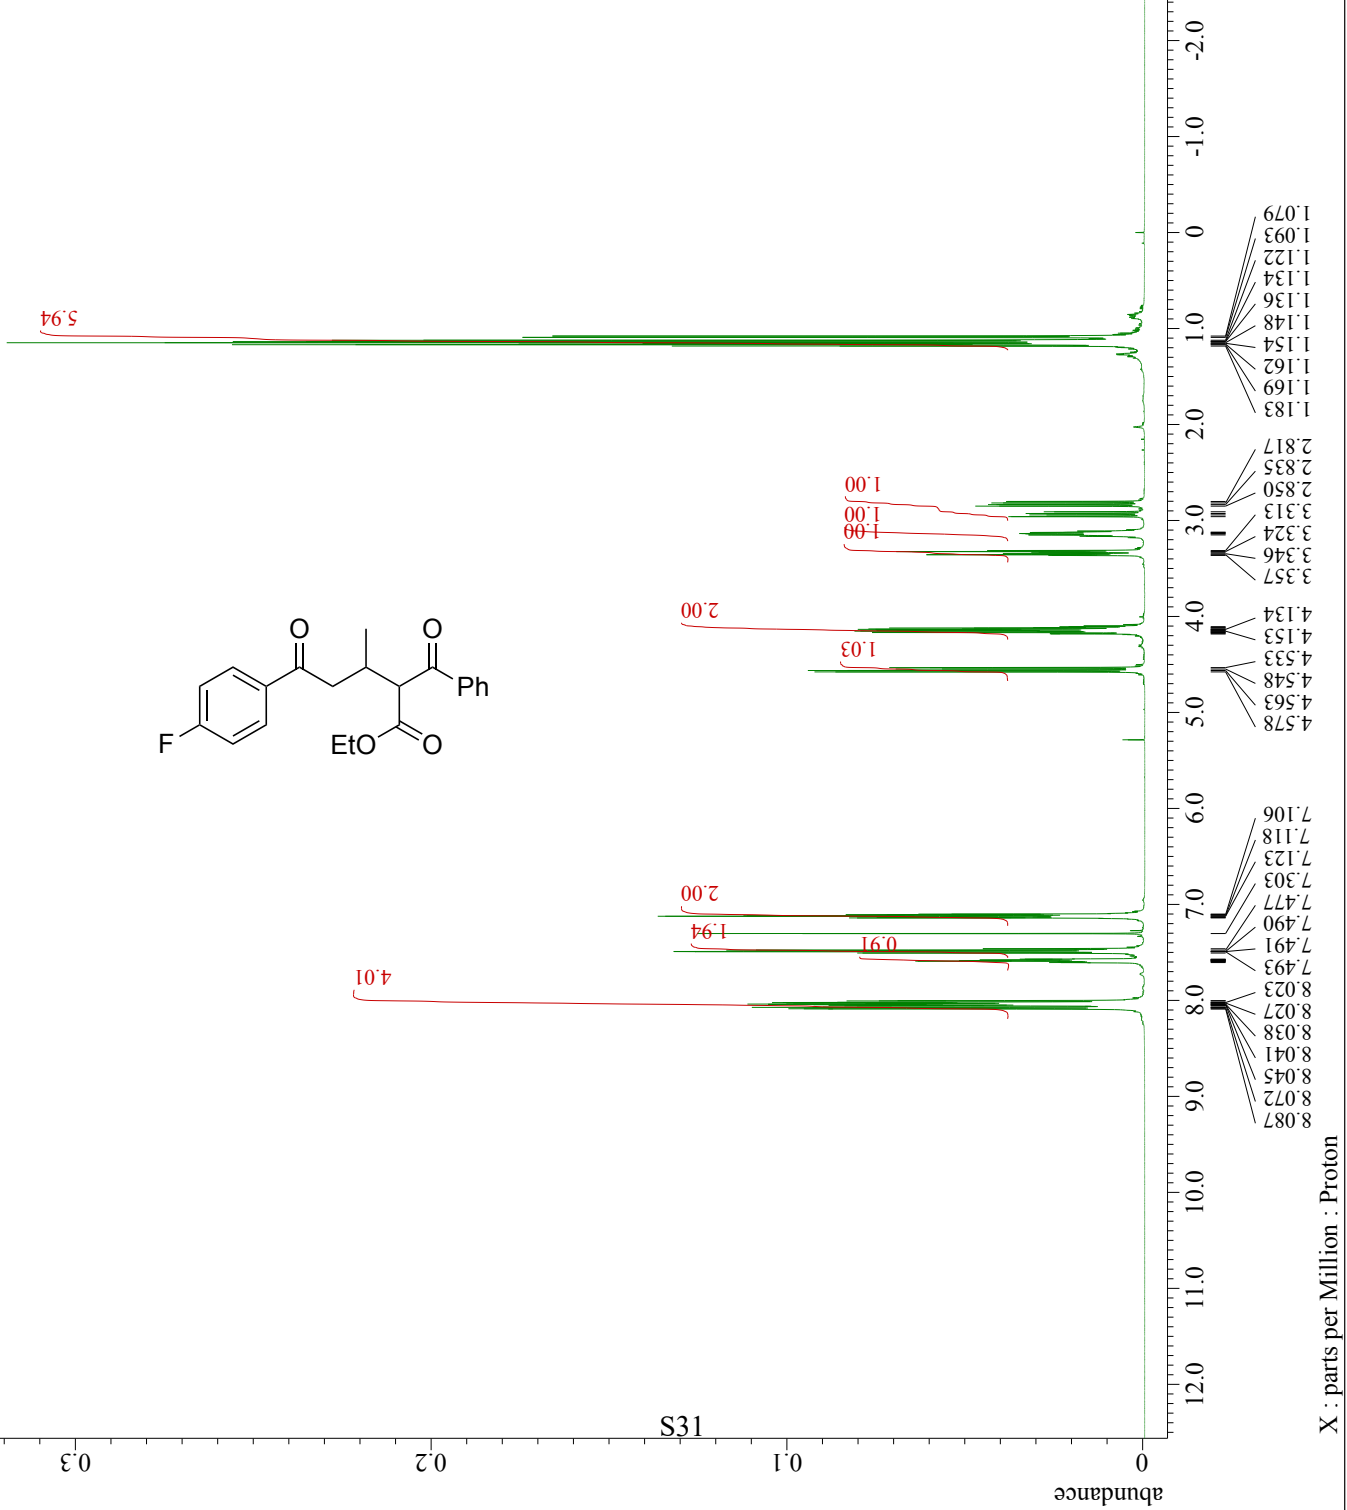

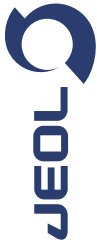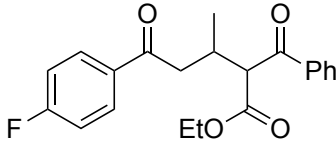

----- PROCESSING PARAMETERS -----  
sepp( 1.00646[Hz], 0.0[s] )  
trapezoid( 0[%], 0[%], 80[%], 100[%] )  
zerofill( 2, TRUE )  
fft( 1, TRUE, TRUE )  
machinephase  
ppm  
thresh( 5[%], 1 )  
peak\_pick( 0[Hz], 0.1[ppm], Peaks, 0[Hz] )  
reference( 77.2199[ppm], 7[ppm] )  
thresh( 4.97668[%], 3.59869[%] )  
以下に由来 : R00457-dry-new\_carbon-1-1.jdf

Filename = R00457-dry-new  
Author = delta  
Experiment = carbon.jxp  
Sample\_Id = R00457-dry-new  
Solvent = CHLOROFORM-D  
Actual\_Start\_Time = 8-MAR-2024 19  
Revision\_Time = 12-APR-2024 14  
Data\_Format = 1D\_COMPLEX  
Dim\_Size = 104858  
X\_Domain = Carbon13  
Dim\_Title = Carbon13  
Dim\_Units = [ppm]  
Dimensions = X  
Site = JNM-ECZ500R/M3  
Spectrometer = JNM-ECZ500R/M3  
Field\_Strength = 11.747379[T]  
X\_Acq\_Duration = 0.99357984[s]  
X\_Domain = Carbon13  
X\_Freq = 125.76529768[M]  
X\_Offset = 100[ppm]  
X\_Points = 39303  
X\_Points\_Input = 31442  
X\_Prescans = 4  
X\_Resolution = 1.00646164[Hz]  
X\_Sweep = 39.5696203[kH]  
X\_Sweep\_Clipped = 31.64556962[kH]  
X\_Sweep\_Input = 251.0[ppm]  
Irr\_Domain = Proton  
Irr\_Freq = 500.15991521[M]  
Irr\_Offset = 5.0[ppm]  
Blanking = FALSE  
Clipped = 256  
Total\_Scans = 256  
Relaxation\_Delay = 2[s]  
Recvr\_Gain = 52  
Temp\_Get = 22.1[dc]  
X\_90\_Width = 12.19[us]  
X\_Acq\_Time = 0.99357984[s]  
X\_Angle = 30[deg]  
X\_Acn = 1.51[db]  
X\_Data\_Points = 32768  
X\_Points\_Default = 39557  
X\_Pulse = 4.06333333[us]  
Irr\_Atn\_Dec = 29[db]  
Irr\_Atn\_Dec\_Calc = 29[db]  
Irr\_Atn\_Noise = 29[db]  
Irr\_Bandwidth = 5.97826087[kHz]  
Irr\_Bandwidth\_Ppm = 11.9526989[ppm]  
Irr\_Corresp\_Pw90 = 92[us]

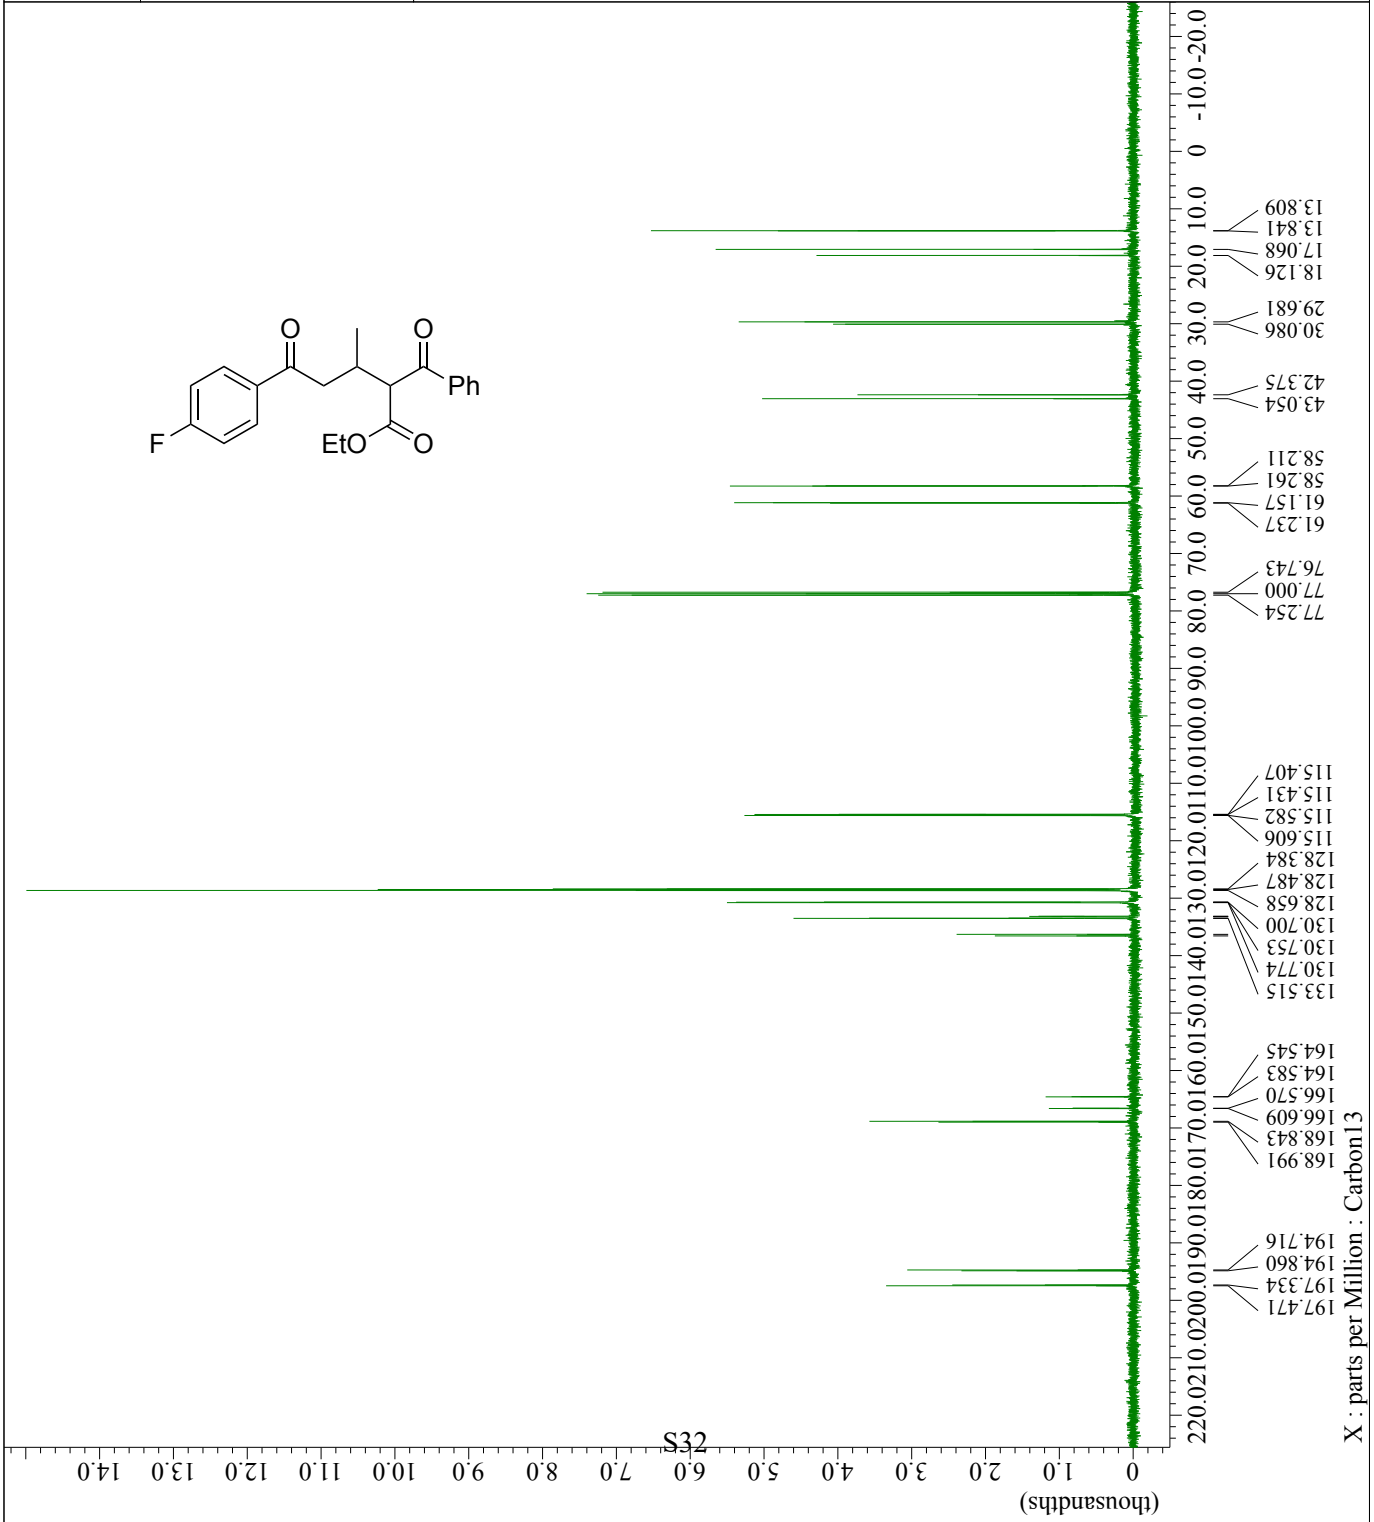



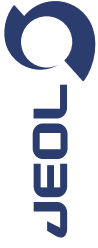

```
---- PROCESSING PARAMETERS ----  
sexp( 0.33488[Hz], 0.0[s] )  
trapezoid( 0[%], 0[%], 80[%], 100[%] )  
zerofill( 2, TRUE )  
fft( 1, TRUE, TRUE )  
machinephase  
ppm  
reference( -62.59676[ppm], -63.72[ppm] )  
thresh( 62.17139[%], 1 )
```

以下に由来 : : R00457-purified-2\_Fluorine-1-1.jdf

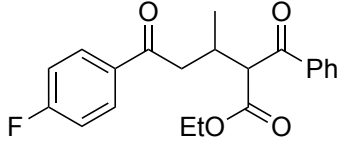

PhCF<sub>3</sub>

S33

abundance

-10.0 -20.0 -30.0 -40.0 -50.0 -60.0 -70.0 -80.0 -90.0 -100.0 -110.0 -120.0 -130.0 -140.0 -150.0 -160.0 -170.0 -180.0 -190.0

-106.184  
-106.309

-63.720

```
Filename = R00457-purifie  
Author = delta  
Experiment = single_pulse.j  
Sample_Id = R00457-purifie  
Solvent = CHLOROFORM-D  
Actual_Start_Time = 22-FEB-2024 10  
Revision_Time = 26-MAR-2024 12  
Data_Format = 1D_COMPLEX  
Din_Size = 838861  
X_Domain = Fluorine19  
Dim_Title = Fluorine19  
Dim_Units = [ppm]  
Dimensions = X  
Site = JNM-ECZ500R/M3  
Spectrometer = JNM-ECZ500R/M3  
Field_Strength = 11.7473579[T]  
X_Acq_Duration = 2.98610082[s]  
X_Domain = Fluorine19  
X_Freq = 470.62046084[M]  
X_Offset = -100[ppm]  
X_Points = 352967  
X_Points_Input = 282373  
X_Prescans = 0  
X_Resolution = 0.33488488[Hz]  
X_Sweep_Clippped = 118.20330969[k  
X_Sweep_Input = 94.56264775[kH  
Irr_Domain = Fluorine19  
Irr_Freq = 470.62046084[M  
Irr_Offset = 5[ppm]  
Tri_Domain = Fluorine19  
Tri_Freq = 470.62046084[M  
Tri_Offset = 5[ppm]  
Blanking = 2[us]  
Clipped = TRUE  
Scans = 16  
Total_Scans = 16  
Relaxation_Delay = 4[s]  
Recvr_Gain = 72  
Temp_Get = 23.1[dc]  
X_90_Width = 7.45[us]  
X_Acq_Time = 2.98610082[s]  
X_Angle = 45[deg]  
X_Atn = 7[dB]  
X_Data_Points = 65536  
X_Points_Default = 65536  
X_Pulse = 3.725[us]  
Irr_Mode = Off  
Tri_Mode = Off  
Dante_Loop = 400
```

X : parts per Million : Fluorine19

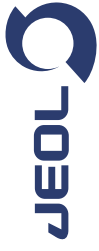

---- PROCESSING PARAMETERS ----

sexp( 0.250161[Hz], 0.0[s] )  
trapezoid( 0[%], 0[%], 80[%], 100[%] )  
zerofill( 2, TRUE )  
fft( 1, TRUE, TRUE )  
machinephase  
Ppm  
reference( -0.02251[ppm], 0[ppm] )

Filename = R00461-dry\_PRO  
Author = console  
Experiment = single\_pulse.j  
Sample\_id = R00461\_purifie  
Solvent = CHLOROFORM-D  
Actual\_Start\_Time = 14-FEB-2024 17  
Revision\_Time = 12-APR-2024 14  
Data\_Format = ID COMPLEX  
Dim\_Size = 52429  
X\_Domain = Proton  
Dim\_Title = Proton  
Dim\_Units = [ppm]  
Dimensions = X  
Site = JNM-ECZ500R/M3  
Spectrometer = JNM-ECZ500R/M3  
Field\_Strength = 11.7473579[T]  
X\_Acq\_Duration = 1.99874592[s]  
X\_Domain = Proton  
X\_Freq = 500.15991521[M]  
X\_Offset = 5.0[ppm]  
X\_Points = 18757  
X\_Points\_Input = 15005  
X\_Prescans = 0  
X\_Resolution = 0.50031372[Hz]  
X\_Sweep = 9.38438438[kHz]  
X\_Sweep\_Clippped = 7.50750751[kHz]  
X\_Sweep\_Input = 15[ppm]  
Irr\_Domain = Proton  
Irr\_Freq = 500.15991521[M]  
Irr\_Offset = 5.0[ppm]  
Tri\_Domain = Proton  
Tri\_Freq = 500.15991521[M]  
Tri\_Offset = 5.0[ppm]  
Blanking = 2[us]  
Clipped = FALSE  
Scans = 8  
Total\_Scans = 8  
Relaxation\_Delay = 4[s]  
Recvr\_Gain = 42  
Temp\_Get = 23.2[dc]  
X\_90\_Width = 7.67[us]  
X\_Acq\_Time = 1.99874592[s]  
X\_Angle = 45[deg]  
X\_Atn = 7.4[dcB]  
X\_Data\_Points = 32768  
X\_Points\_Default = 31282  
X\_Pulse = 3.835[us]  
Irr\_Mode = Off  
Tri\_Mode = Off  
Dante\_Loop = 400

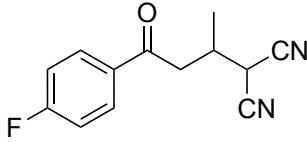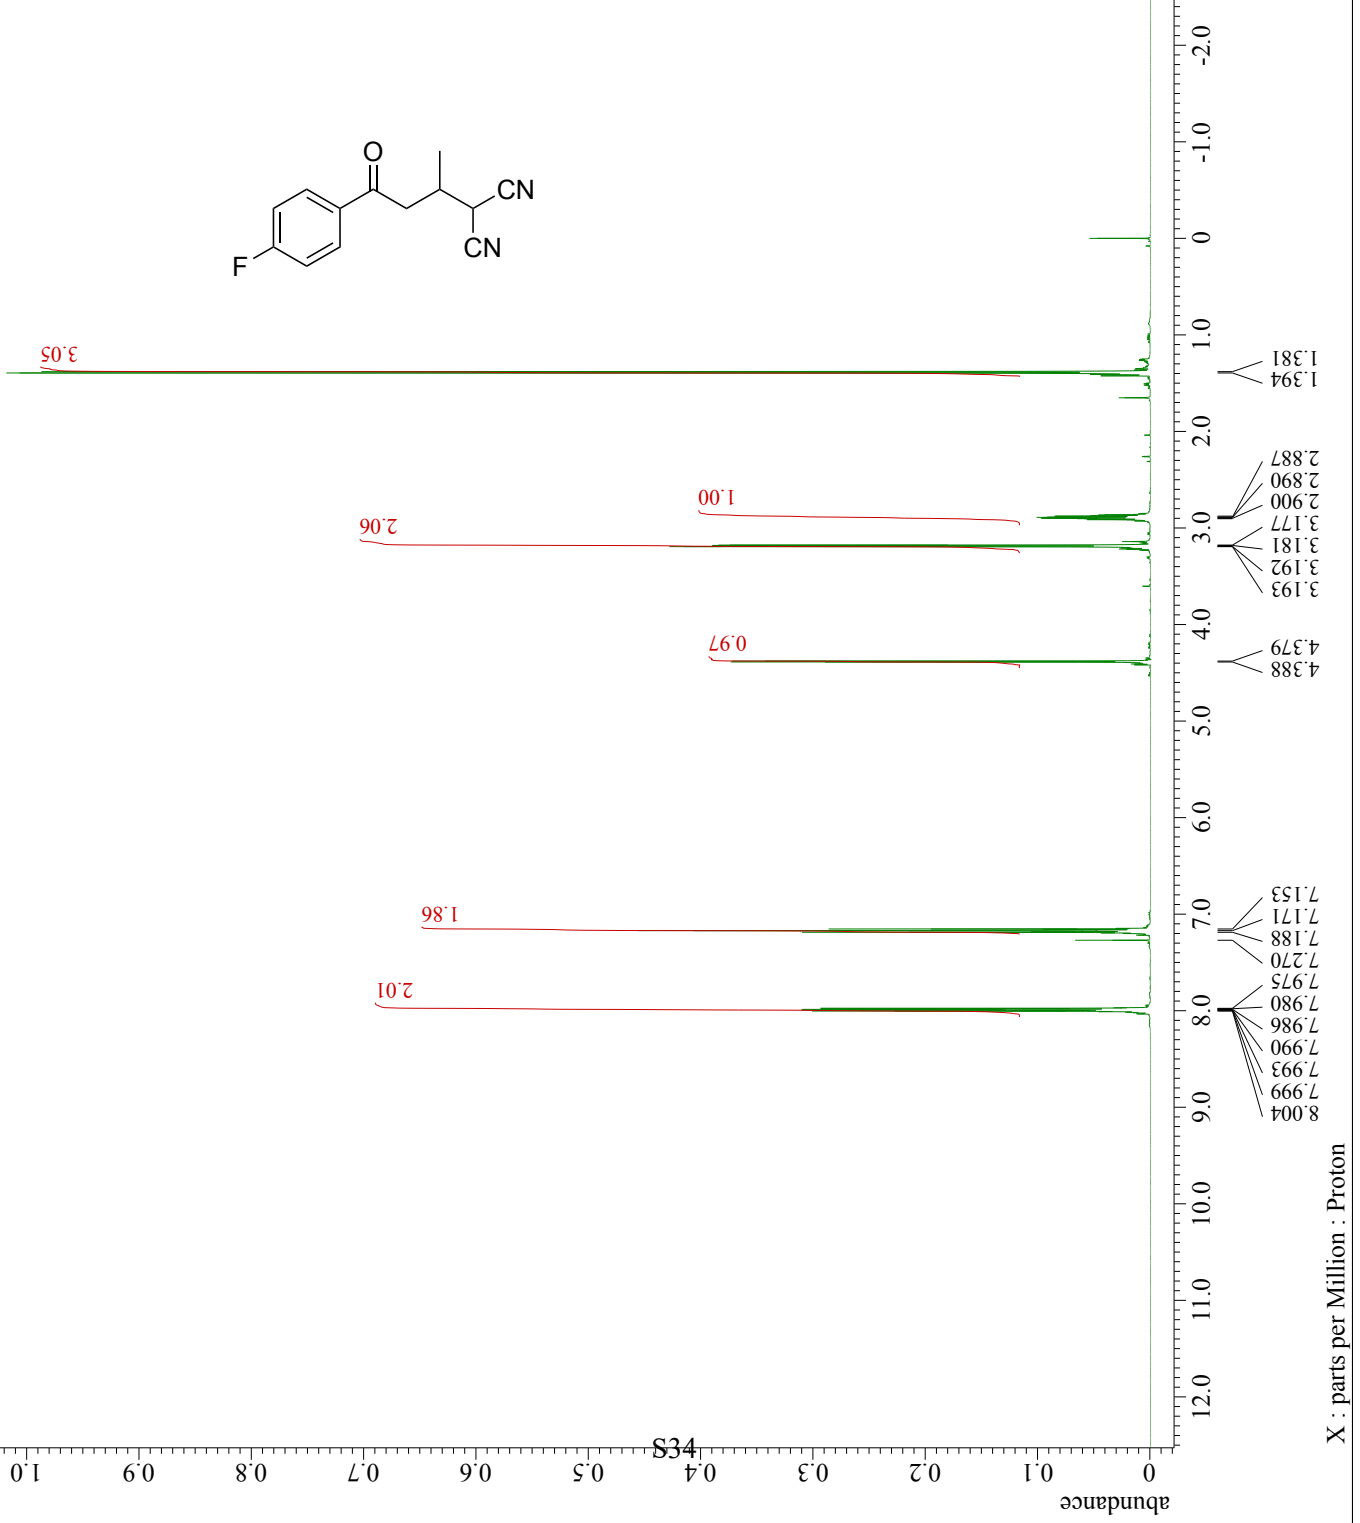

X : parts per Million : Proton

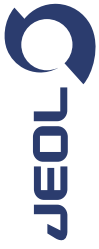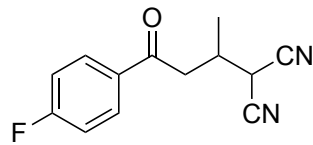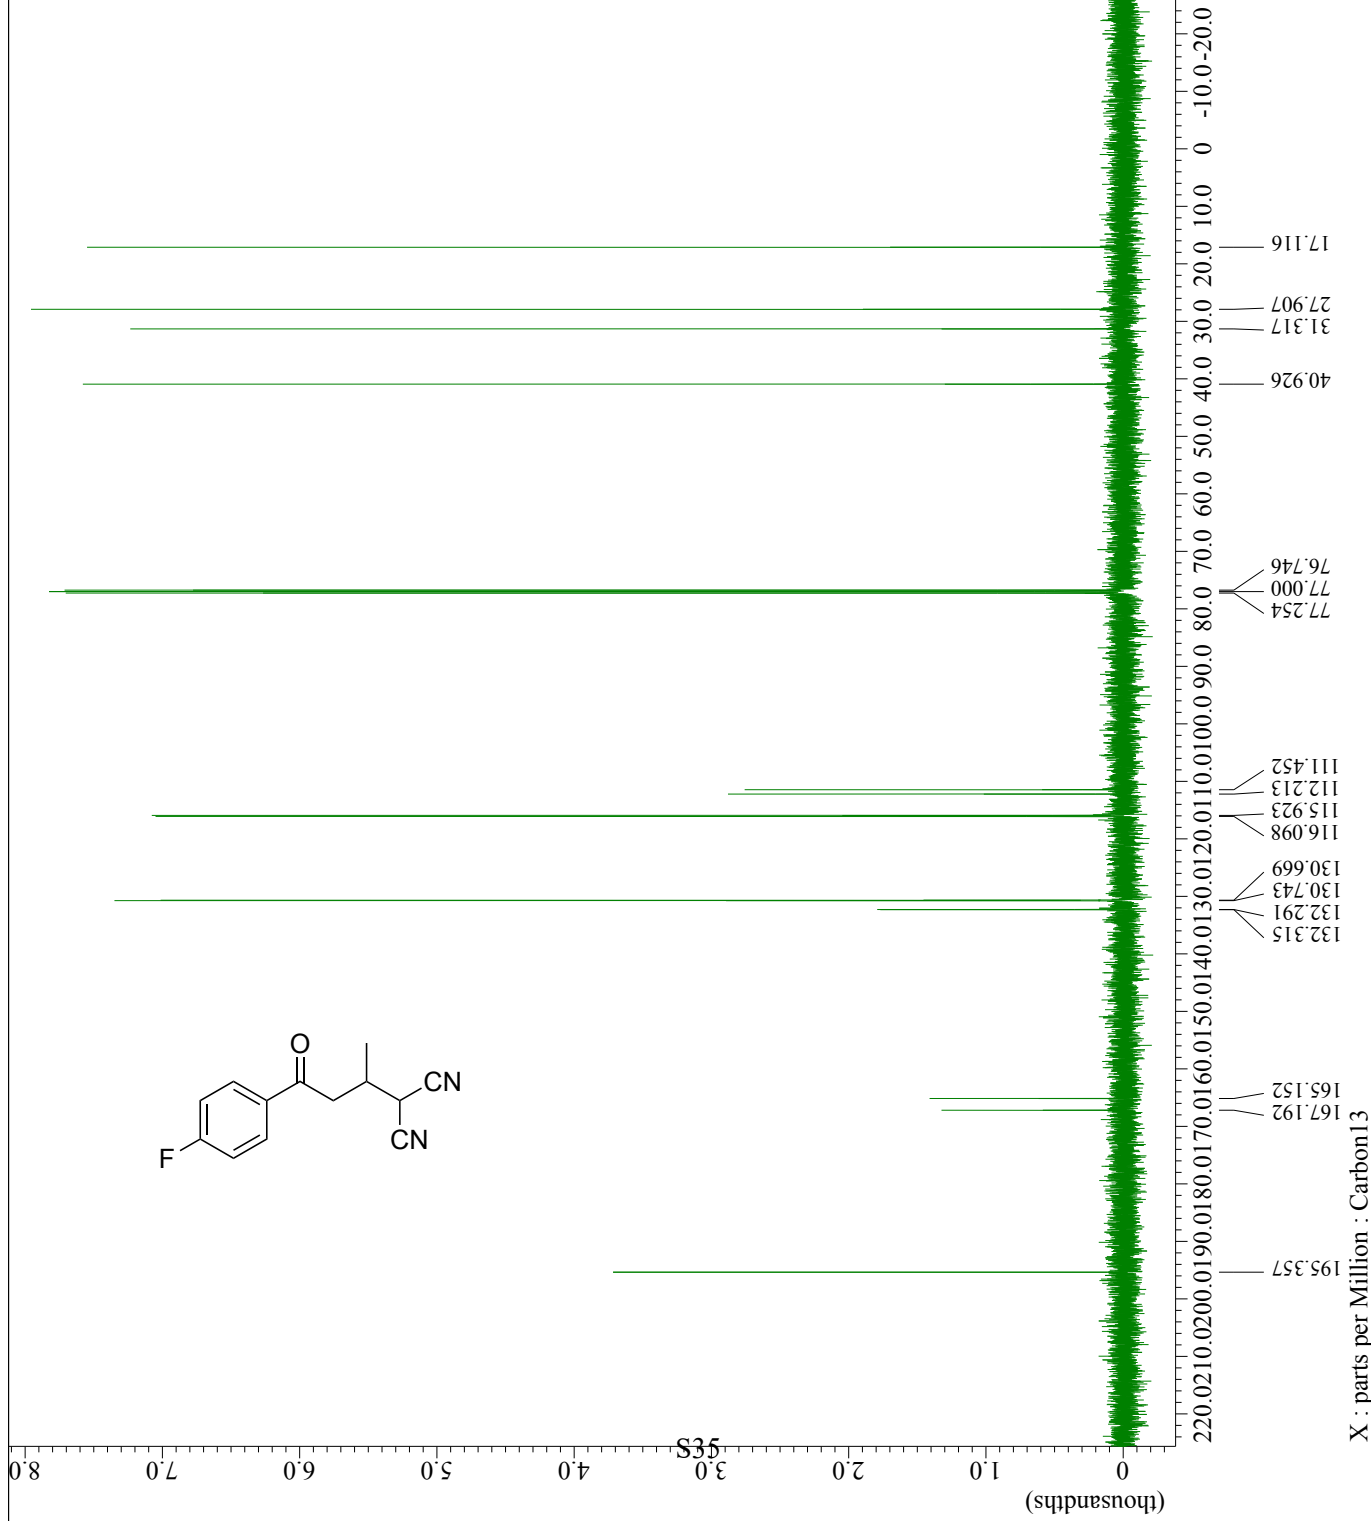

---- PROCESSING PARAMETERS ----  
sexp( 1.00646[Hz], 0.0[us] )  
trapezoid( 0[%], 0[%], 80[%], 100[%] )  
zerofill( 2, TRUE )  
fft( 1, TRUE, TRUE )  
machinphase  
ppm  
thresh( 5[%], 1 )  
peak\_pick( 0[Hz], 0.1[ppm], Peaks, 0[Hz] )  
reference( 77.16471[ppm], 77[ppm] )

以下に由来 : RO0461-dry\_carbon-1-1.jdf

Filename = RO0461-dry\_CAR  
Author = console  
Experiment = carbon\_jxp  
Sample Id = RO0461\_purifie  
Solvent = CHLOROFORM-D  
Actual\_Start\_Time = 14-FEB-2024 17  
Revision\_Time = 12-APR-2024 14  
Data Format = ID COMPLEX  
Dim Size = 104858  
X\_Domain = Carbon13  
Dim\_Title = Carbon13  
Dim\_Units = [ppm]  
Dimensions = X  
Site = JNM-ECZ500R/M3  
Spectrometer = JNM-ECZ500R/M3  
Field Strength = 11.7473579[T]  
X\_Acq\_Duration = 0.99357984[s]  
X\_Domain = Carbon13  
X\_Freq = 125.76529768[M]  
X\_Offset = 100[ppm]  
X\_Points = 39303  
X\_Points\_Input = 31442  
X\_Prescans = 4  
X\_Resolution = 1.00646164[Hz]  
X\_Sweep = 39.55696203[kH]  
X\_Sweep\_Clipped = 31.64556962[kH]  
X\_Sweep\_Input = 251.0[ppm]  
Irr\_Domain = Ertcon  
Irr\_Freq = 500.15991521[M]  
Irr\_Offset = 5.0[ppm]  
Blanking = 5.0[us]  
Clipped = TRUE  
Scans = 129  
Total\_Scans = 129  
Relaxation\_Delay = 2[s]  
Recvr\_Gain = 52  
Temp\_Get = 23[degC]  
X\_90\_Width = 12.19[us]  
X\_Acq\_Time = 0.99357984[s]  
X\_Angle = 30[deg]  
X\_Atn = 11.5[dB]  
X\_Data\_Points = 32768  
X\_Points\_Default = 39587  
Irr\_Atn\_Dec = 4.06333333[us]  
Irr\_Atn\_Dec\_Calc = 29[dB]  
Irr\_Atn\_Noise = 29[dB]  
Irr\_Bandwidth = 5.97826087[kHz]  
Irr\_Bandwidth\_Ppm = 11.9526989[ppm]  
Irr\_Corresp\_Pw90 = 92[us]

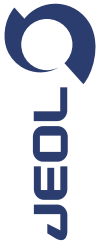

---- PROCESSING PARAMETERS ----  
sexp( 0.33488[Hz], 0.0[s] )  
trapezoid( 0[%], 0[%], 80[%], 100[%] )  
zerofill( 2, TRUE )  
fft( 1, TRUE, TRUE )  
machinephase  
ppm  
reference( -62.55101[ppm], -63.72[ppm] )  
thresh( 93.30321[%], 1 )  
以下は由来 : RO0461-dry\_Fluorine-1-1.jdf

Filename = RO0461-dry\_Flu  
Author = console  
Experiment = single\_pulse.j  
Sample\_id = RO0461-dry  
Solvent = CHLOROFORM-D  
Actual\_Start\_Time = 14-FEB-2024 17  
Revision\_Time = 12-APR-2024 14  
Data\_Format = 1D COMPLEX  
Dim\_Size = 838861  
X\_Domain = Fluorine19  
Dim\_Title = Fluorine19  
Dim\_Units = [ppm]  
Dimensions = X  
Site = JNM-ECZ500R/M3  
Spectrometer = JNM-ECZ500R/M3  
Field\_Strength = 11.7473579[T]  
X\_Acq\_Duration = 2.98610082[s]  
X\_Domain = Fluorine19  
X\_Freq = 470.62046084[M]  
X\_Offset = -100[ppm]  
X\_Points = 352967  
X\_Points\_Input = 282373  
X\_Prescans = 0  
X\_Resolution = 0.33488488[Hz]  
X\_Sweep = 118.20330969[k  
X\_Sweep\_Clippped = 94.56264775[kH  
X\_Sweep\_Input = 200[ppm]  
Irr\_Domain = Fluorine19  
Irr\_Freq = 470.62046084[M  
Irr\_Offset = 5[ppm]  
Tri\_Domain = Fluorine19  
Tri\_Freq = 470.62046084[M  
Tri\_Offset = 5[ppm]  
Blanking = 2[us]  
Clipped = FALSE  
Scans = 16  
Total\_Scans = 16  
Relaxation\_Delay = 4[s]  
Recvr Gain = 62  
Temp\_Get = 23.3[dc]  
X\_90\_Width = 7.45[us]  
X\_Acq\_Time = 2.98610082[s]  
X\_Angle = 45[deg]  
X\_Atn = 7[db]  
X\_Data\_Points = 65536  
X\_Points\_Default = 65536  
X\_Pulse = 3.725[us]  
Irr\_Mode = Off  
Tri\_Mode = Off  
Dante\_Loop = 400

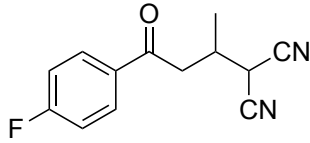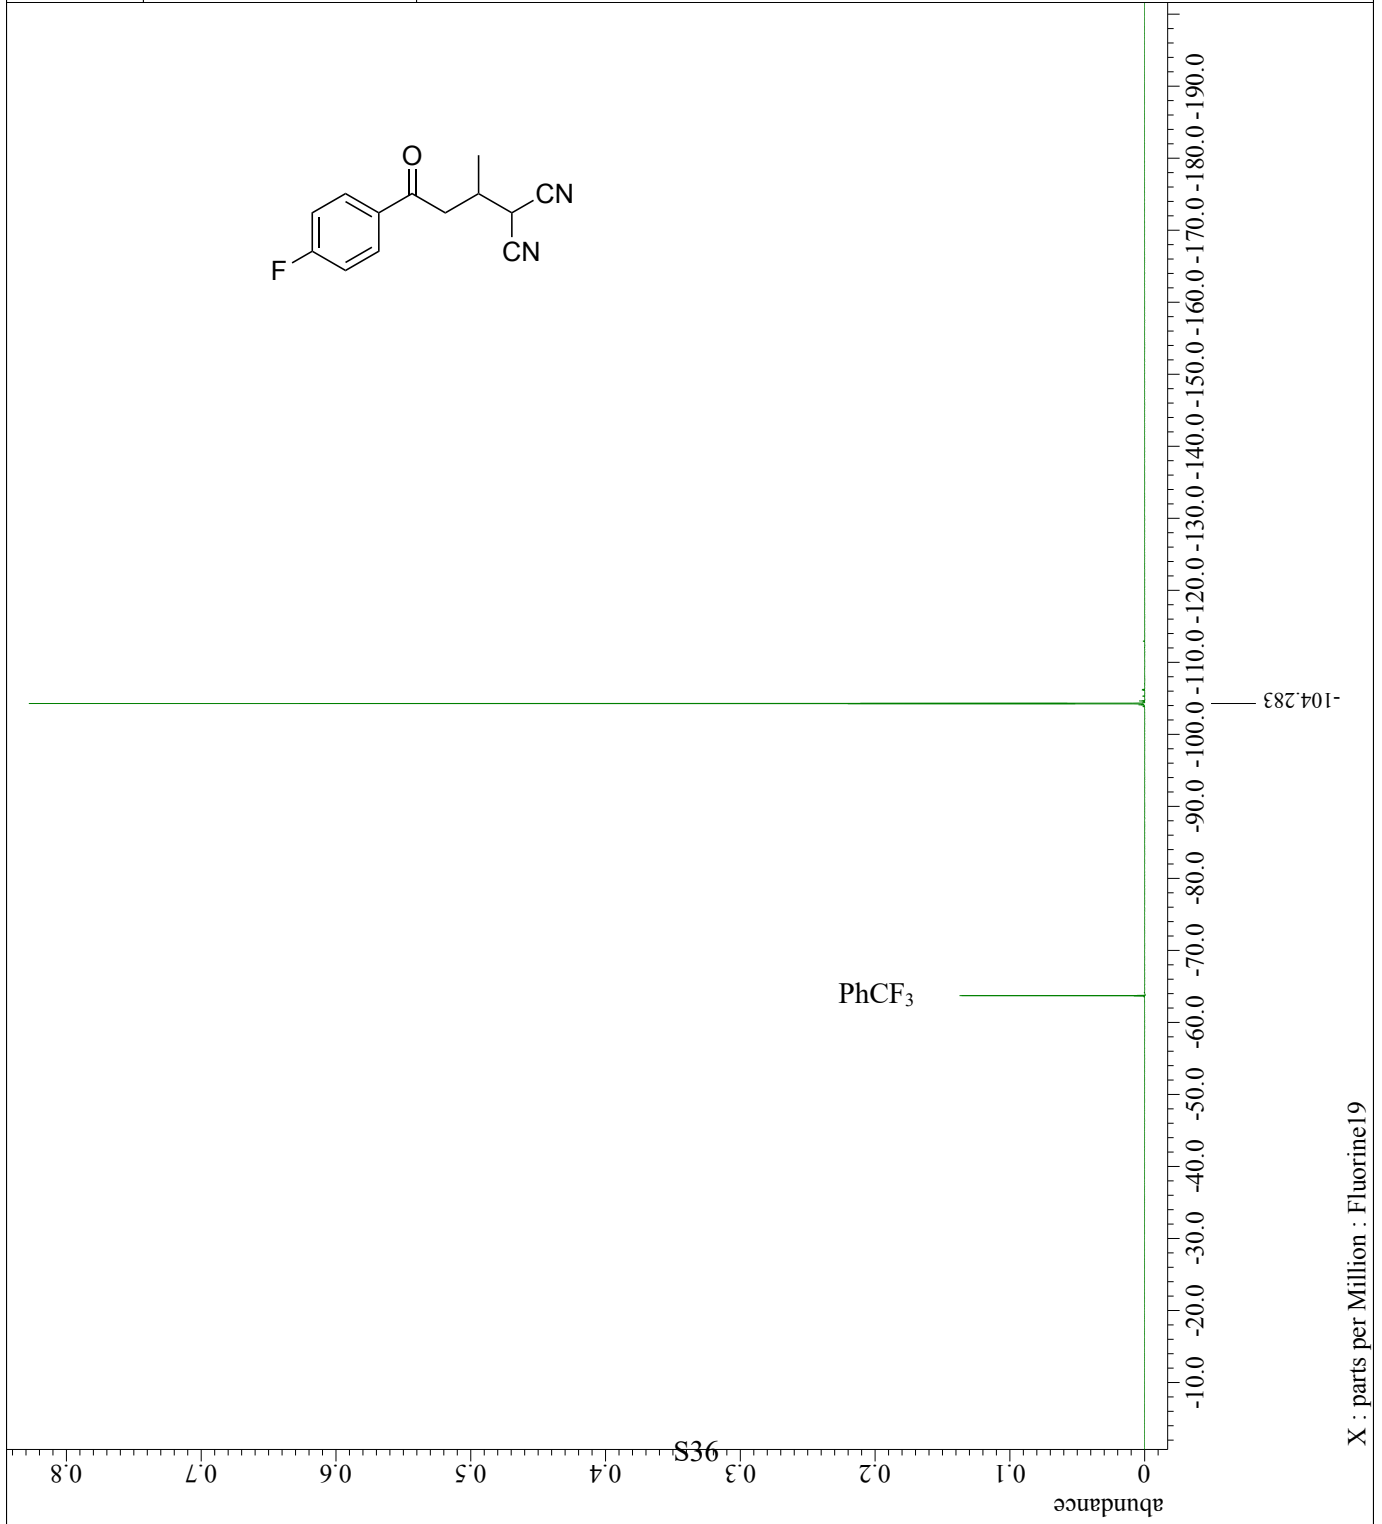

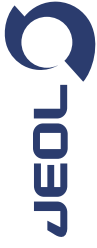

---- PROCESSING PARAMETERS ----  
sexp( 0.25016[Hz], 0.0[s] )  
trapezoid( 0[%], 0[%], 80[%], 100[%] )  
zerofill( 2, TRUE )  
fft( 1, TRUE, TRUE )  
machinephase  
ppm  
phase( -0.18196, 3.4973, 75.103[%] )  
reference( -0.04656[ppm], 0[ppm] )  
thresh( 5.65292[%], 1 )

File = RO0493-dry\_PRO  
Author = console  
Experiment = single\_pulse.j  
Sample Id = RO0493-dry  
Solvent = CHLOROFORM-D  
Actual\_Start\_Time = 12-APR-2024 19  
Revision\_Time = 23-APR-2024 21  
Data\_Format = 1D COMPLEX  
Dim\_Size = 52429  
X\_Domain = Proton  
Dim\_Title = Proton  
Dim\_Units = [ppm]  
Dimensions = X  
Site = JNM-ECZ500R/M3  
Spectrometer = JNM-ECZ500R/M3  
Field\_Strength = 11.7473579[T]  
X\_Acq\_Duration = 1.99874592[s]  
X\_Domain = Proton  
X\_Freq = 500.15991521[M]  
X\_Offset = 5.0[ppm]  
X\_Points = 18757  
X\_Points\_Input = 15005  
X\_Prescans = 0  
X\_Resolution = 0.50031372[Hz]  
X\_Sweep = 9.38438438[kHz]  
X\_Sweep\_Clippped = 7.50750751[kHz]  
X\_Sweep\_Input = 15[ppm]  
Irr\_Domain = Proton  
Irr\_Freq = 500.15991521[M]  
Irr\_Offset = 5.0[ppm]  
Tri\_Domain = Proton  
Tri\_Freq = 500.15991521[M]  
Tri\_Offset = 5.0[ppm]  
Blanking = 2[us]  
Clipped = FALSE  
Scans = 8  
Total\_Scans = 8  
Relaxation\_Delay = 4[s]  
Recvr\_Gain = 42  
Temp\_Get = 22.8[dc]  
X\_90\_Width = 14[us]  
X\_Acq\_Time = 1.99874592[s]  
X\_Angle = 45[deg]  
X\_Attn = 8[db]  
X\_Data\_Points = 32768  
X\_Points\_Default = 31282  
X\_Pulse = 7[us]  
Tri\_Mode = Off  
Dante\_Loop = Off  
Dante\_Loop = 400

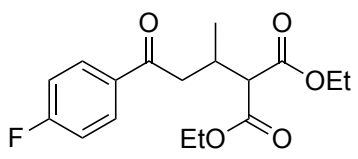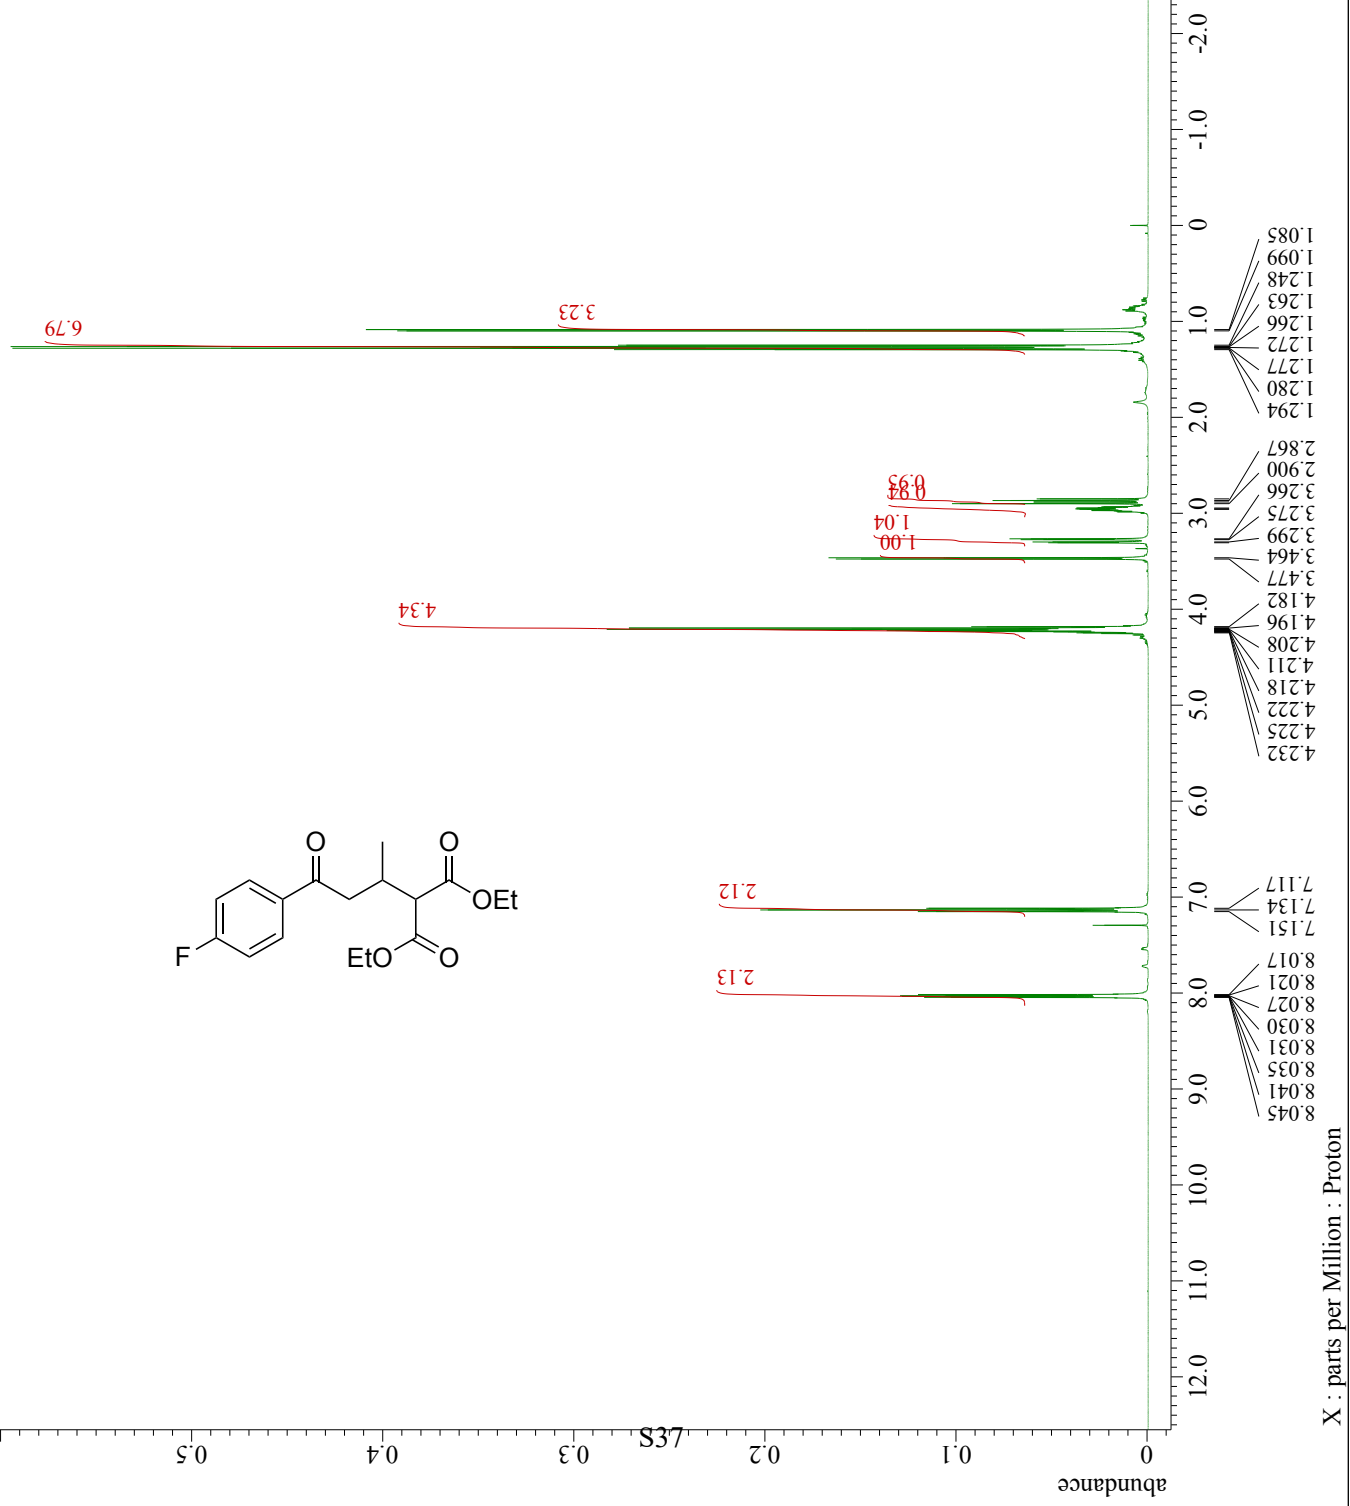

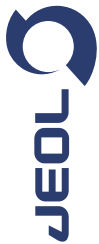

---- PROCESSING PARAMETERS ----  
sexp( 1.00646[Hz], 0.0[s] )  
trapezoid( 0[%], 0[%], 80[%], 100[%] )  
zerofill( 2, TRUE )  
fft( 1, TRUE, TRUE )  
machinephase  
ppm  
thresh( 5[%], 1 )  
peak\_pick( 0[Hz], 0.1[ppm], Peaks, 0[Hz] )  
reference( 77.14791[ppm], 77[ppm] )  
以下に由来 : RO0493-dry\_carbon-1-1.jdf

Filename = RO0493-dry\_CAR  
Author = delta  
Experiment = carbon\_jxp  
Sample\_Id = RO0493-dry  
Solvent = CHLOROFORM-D  
Actual\_Start\_Time = 30-MAR-2024 11  
Revision\_Time = 12-APR-2024 16  
Data\_Format = 1D COMPLEX  
Dim\_Size = 104858  
X\_Domain = Carbon13  
Dim\_Title = Carbon13  
Dim\_Units = [ppm]  
Dimensions = X  
Site = JNM-ECZ500R/M3  
Spectrometer = JNM-ECZ500R/M3  
Field\_Strength = 11.7473579[T]  
X\_Acq\_Duration = 0.99357984[s]  
X\_Domain = Carbon13  
X\_Freq = 125.76529768[M]  
X\_Offset = 100[ppm]  
X\_Points = 39303  
X\_Points\_Input = 31442  
X\_Prescans = 4  
X\_Resolution = 1.00646164[Hz]  
X\_Sweep = 39.55696203[kHz]  
X\_Sweep\_Clipped = 31.64556962[kHz]  
X\_Sweep\_Input = 251.0[ppm]  
Irr\_Domain = Proton  
Irr\_Freq = 500.15991521[M]  
Irr\_Offset = 5.0[ppm]  
Blanking = FALSE  
Clipped = FALSE  
Scans = 105  
Total\_Scans = 105  
Relaxation\_Delay = 2[s]  
Recvr\_Gain = 52  
Temp\_Get = 22[°C]  
X\_90\_Width = 12.19[us]  
X\_Acq\_Time = 0.99357984[s]  
X\_Angle = 30[deg]  
X\_Atn = 11.5[db]  
X\_Data\_Points = 32768  
X\_Points\_Default = 39557  
Irr\_Atn\_Dec = 29[db]  
Irr\_Atn\_Dec\_Calc = 29[db]  
Irr\_Atn\_Noise = 29[db]  
Irr\_Bandwidth = 5.97826087[kHz]  
Irr\_Bandwidth\_Ppm = 11.9526989[ppm]  
Irr\_Corresp\_Pw90 = 92[us]

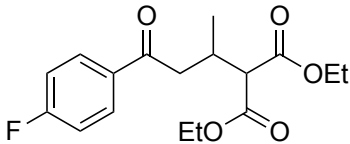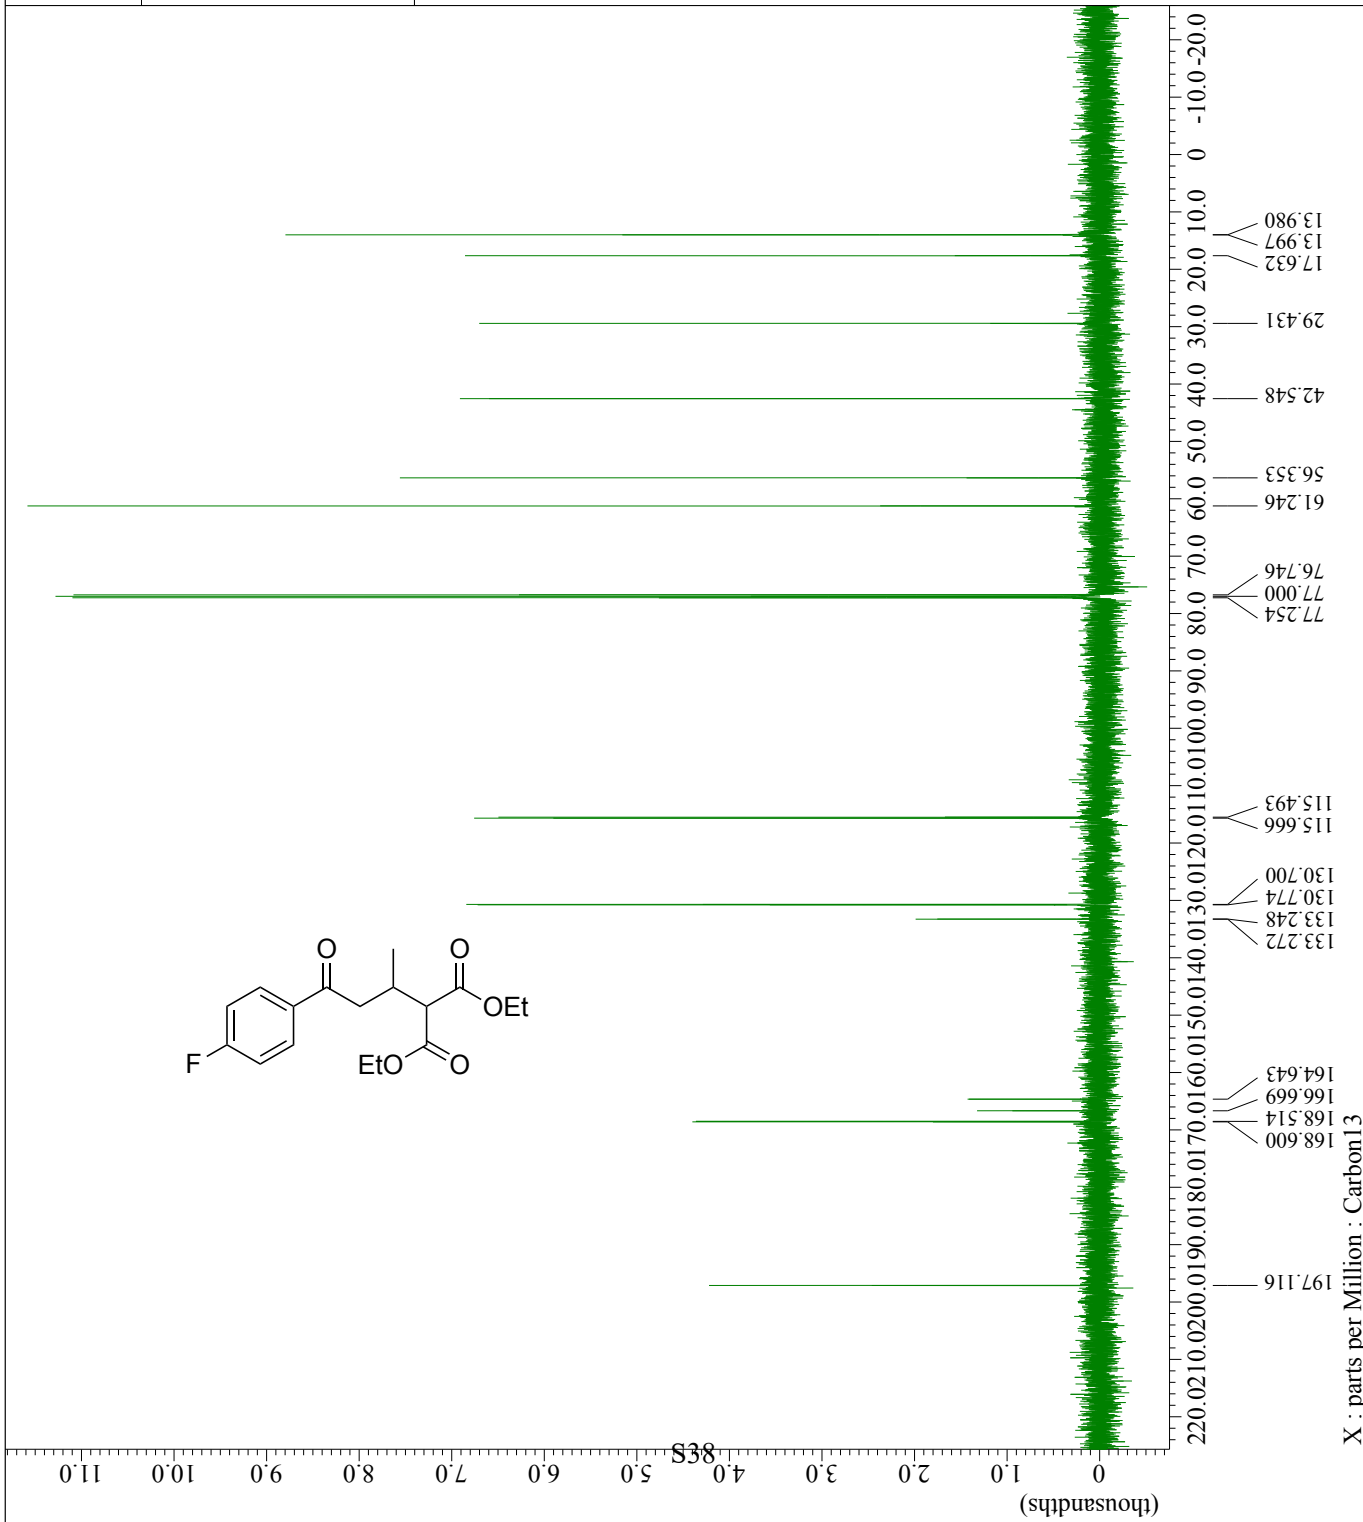

X : parts per Million : Carbon13

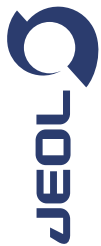

```
---- PROCESSING PARAMETERS ----
dc_balance( 0, FALSE )
exp( 0.2[Hz], 0.0[s] )
trapezoid( 0[%], 0[%], 80[%], 100[%] )
zerofill( 1, TRUE )
fft( 1, TRUE, TRUE )
machinphase
ppm
phase( -0.92513, 0, 76.1407[%] )
phase( -24, -50, 50[%] )
reference( -62.65821[ppm], -63.72[ppm] )
thresh( 41.14266[%], 1 )
```

以下に由来: R00493-dry\_single\_pulse(fluorine)-1

```
Filename = R00493-dry_single_pulse(f
Author = delta
Experiment = single_pulse.jxp
Sample Id = R00493-dry
Solvent = CHLOROFORM-D
Actual_Start_Time = 13-APR-2024 10:43:00
Revision_Time = 13-APR-2024 17:55:12
Comment = single_pulse
Data Format = ID COMPLEX
Dim Size = 13107
X_Domain = Fluori
Dim_Title = Fluorine19
Dim_Units = [ppm]
Dimensions = X
Site = JNM-ECS400
Spectrometer = DELTA2_NMR
Field Strength = 9.389766[T] (400[MHz])
X_Acq_Duration = 86.50752[ms]
X_Domain = 19F
X_Freq = 376.17105393[MHz]
X_Offset = 0[ppm]
X_Points = 16384
X_Prescans = 1
X_Resolution = 11.5596868[Hz]
X_Sweep = 189.39393939[kHz]
X_Sweep_Clippped = 151.51515152[kHz]
Irr_Domain = Fluorine19
Irr_Freq = 376.17105393[MHz]
Irr_Offset = 5[ppm]
Tri_Domain = Fluorine19
Tri_Freq = 376.17105393[MHz]
Tri_Offset = 5[ppm]
Clipped = TRUE
Scans = 8
Total_Scans = 8
Relaxation_Delay = 5[s]
Recvr Gain = 50
Temp_Get = 25[dc]
X_90_Width = 7.95[us]
X_Acq_Time = 86.50752[ms]
X_Angle = 45[deg]
X_Atn = 3[dB]
X_Pulse = 3.975[us]
Irr_Mode = Off
Tri_Mode = Off
Dante_Preset = FALSE
Initial Wait = 1[s]
Repetition_Time = 5.08650752[s]
```

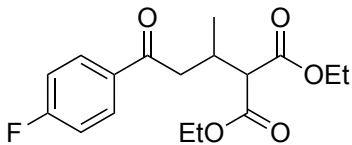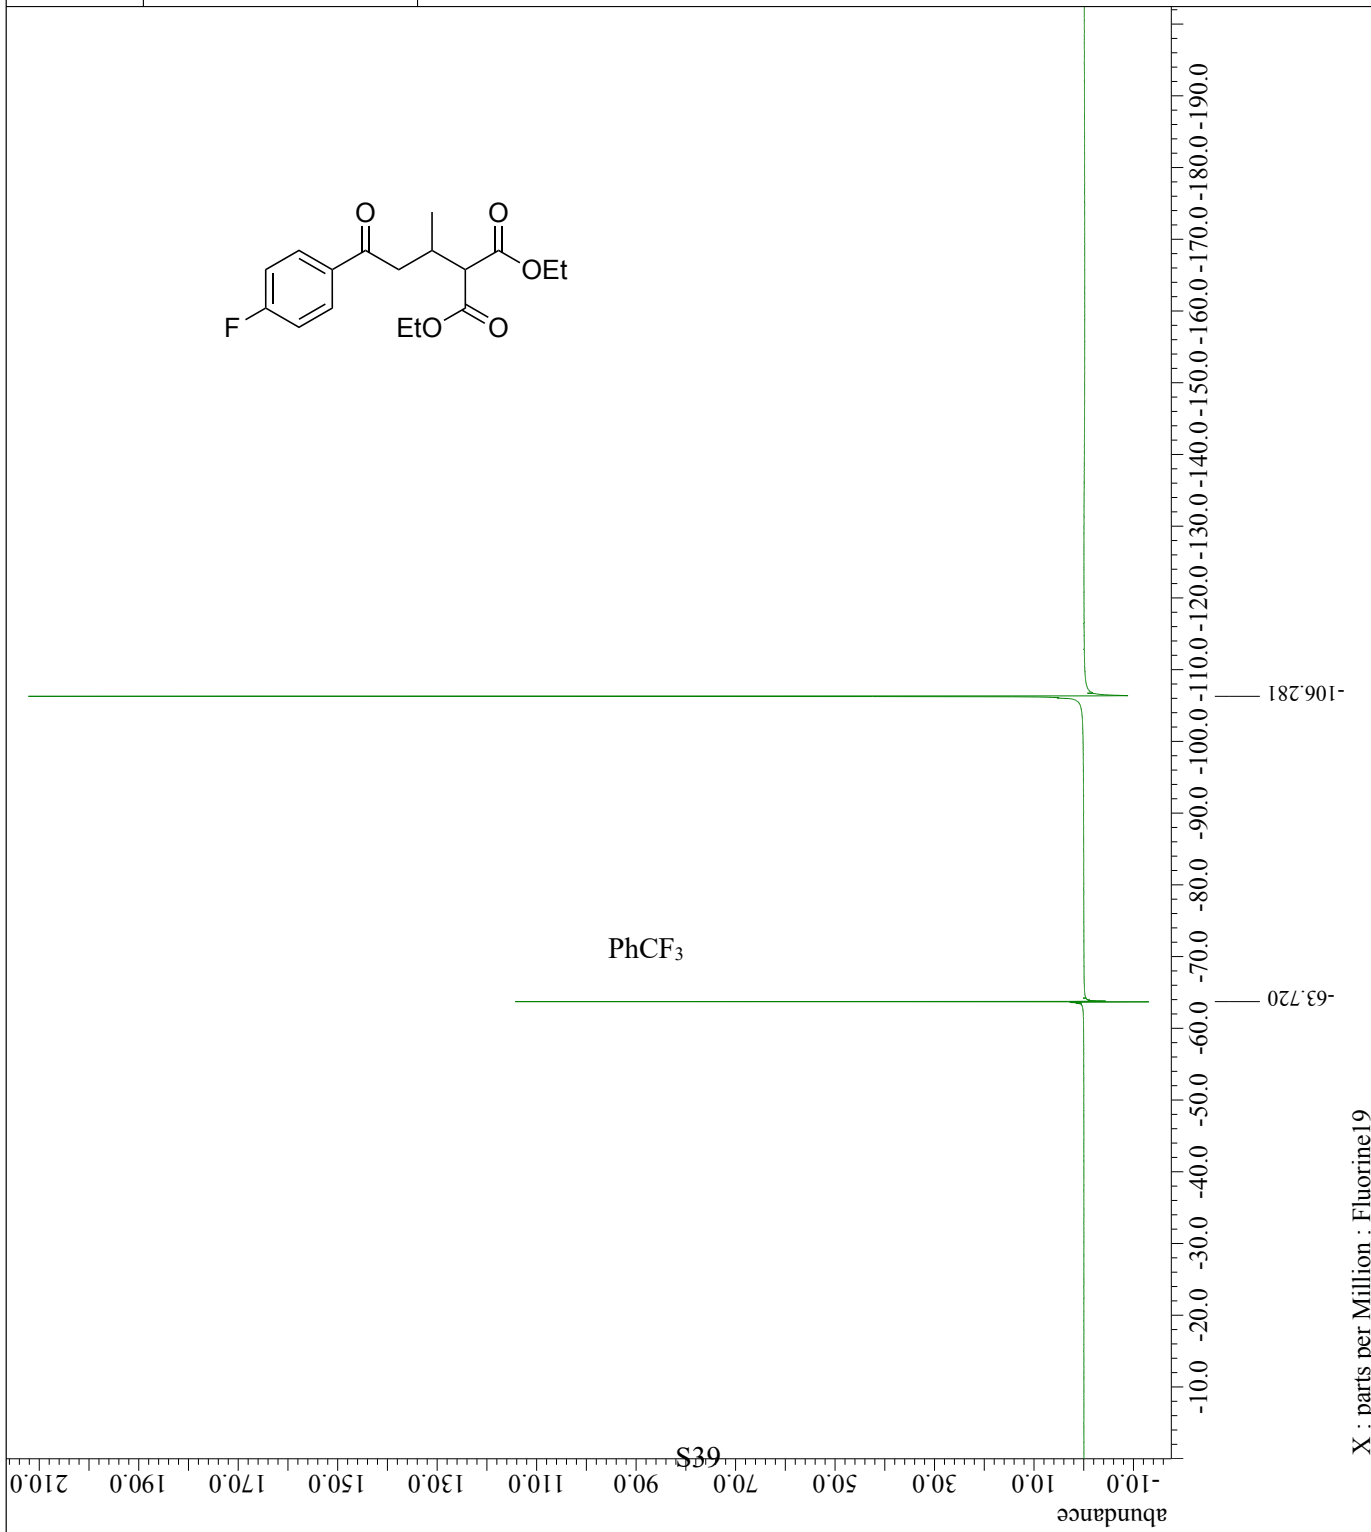

X : parts per Million : Fluorine19

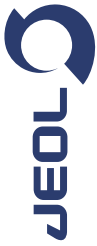

---- PROCESSING PARAMETERS ----  
sexp( 0.25016[Hz], 0.0[ls] )  
trapezoid( 0[%], 0[%], 80[%], 100[%] )  
zerofill( 2, TRUE )  
fft( 1, TRUE, TRUE )  
machinephase  
ppm  
phase( 1.35846, -11.50809, 74.99237[%] )  
reference( -0.03253[ppm], 0[ppm] )

File Name = R00494-purifie  
Author = delta  
Experiment = single pulse.j  
Sample Id = R00494-purifie  
Solvent = CHLOROFORM-D  
Actual\_Start\_Time = 25-MAR-2024 15  
Revision\_Time = 23-APR-2024 21

Data Format = 1D COMPLEX  
Dim\_Size = 52429  
X\_Domain = Proton  
Dim\_Title = Proton  
Dim\_Units = [ppm]  
Dimensions = X  
Site = JNM-EZ500R/M3  
Spectrometer = JNM-EZ500R/M3

Field Strength = 11.7473579 [T]  
X\_Acq Duration = 1.99874592 [s]  
X\_Domain = Proton  
X\_Freq = 500.15991521 [M]  
X\_Offset = 5.0 [ppm]  
X\_Points = 18757  
X\_Points\_Input = 15005  
X\_Prescans = 0  
X\_Resolution = 0.50031372 [Hz]  
X\_Sweep = 9.38438438 [kHz]  
X\_Sweep\_Clippped = 7.50750751 [kHz]  
X\_Sweep\_Input = 15 [ppm]  
Irr\_Domain = Proton  
Irr\_Freq = 500.15991521 [M]  
Irr\_Offset = 5.0 [ppm]  
Irr\_Domain = Proton  
Tri\_Freq = 500.15991521 [M]  
Tri\_Offset = 5.0 [ppm]  
Blanking = 2 [us]  
Clipped = FALSE  
Scans = 8  
Total\_Scans = 8

Relaxation\_Delay = 4 [s]  
Recvr\_Gain = 42  
Temp\_Get = 21.9 [dC]  
X\_90\_Width = 7.67 [us]  
X\_Acq Time = 1.99874592 [s]  
X\_Angle = 45 [deg]  
X\_Attn = 7.4 [dB]  
X\_Data Points = 32768  
X\_Points\_Default = 31282  
X\_Pulse = 3.835 [us]  
Irr\_Mode = Off  
Tri\_Mode = Off  
Dante\_Loop = 400

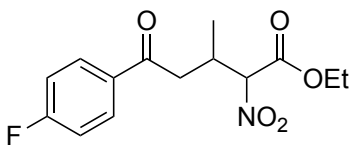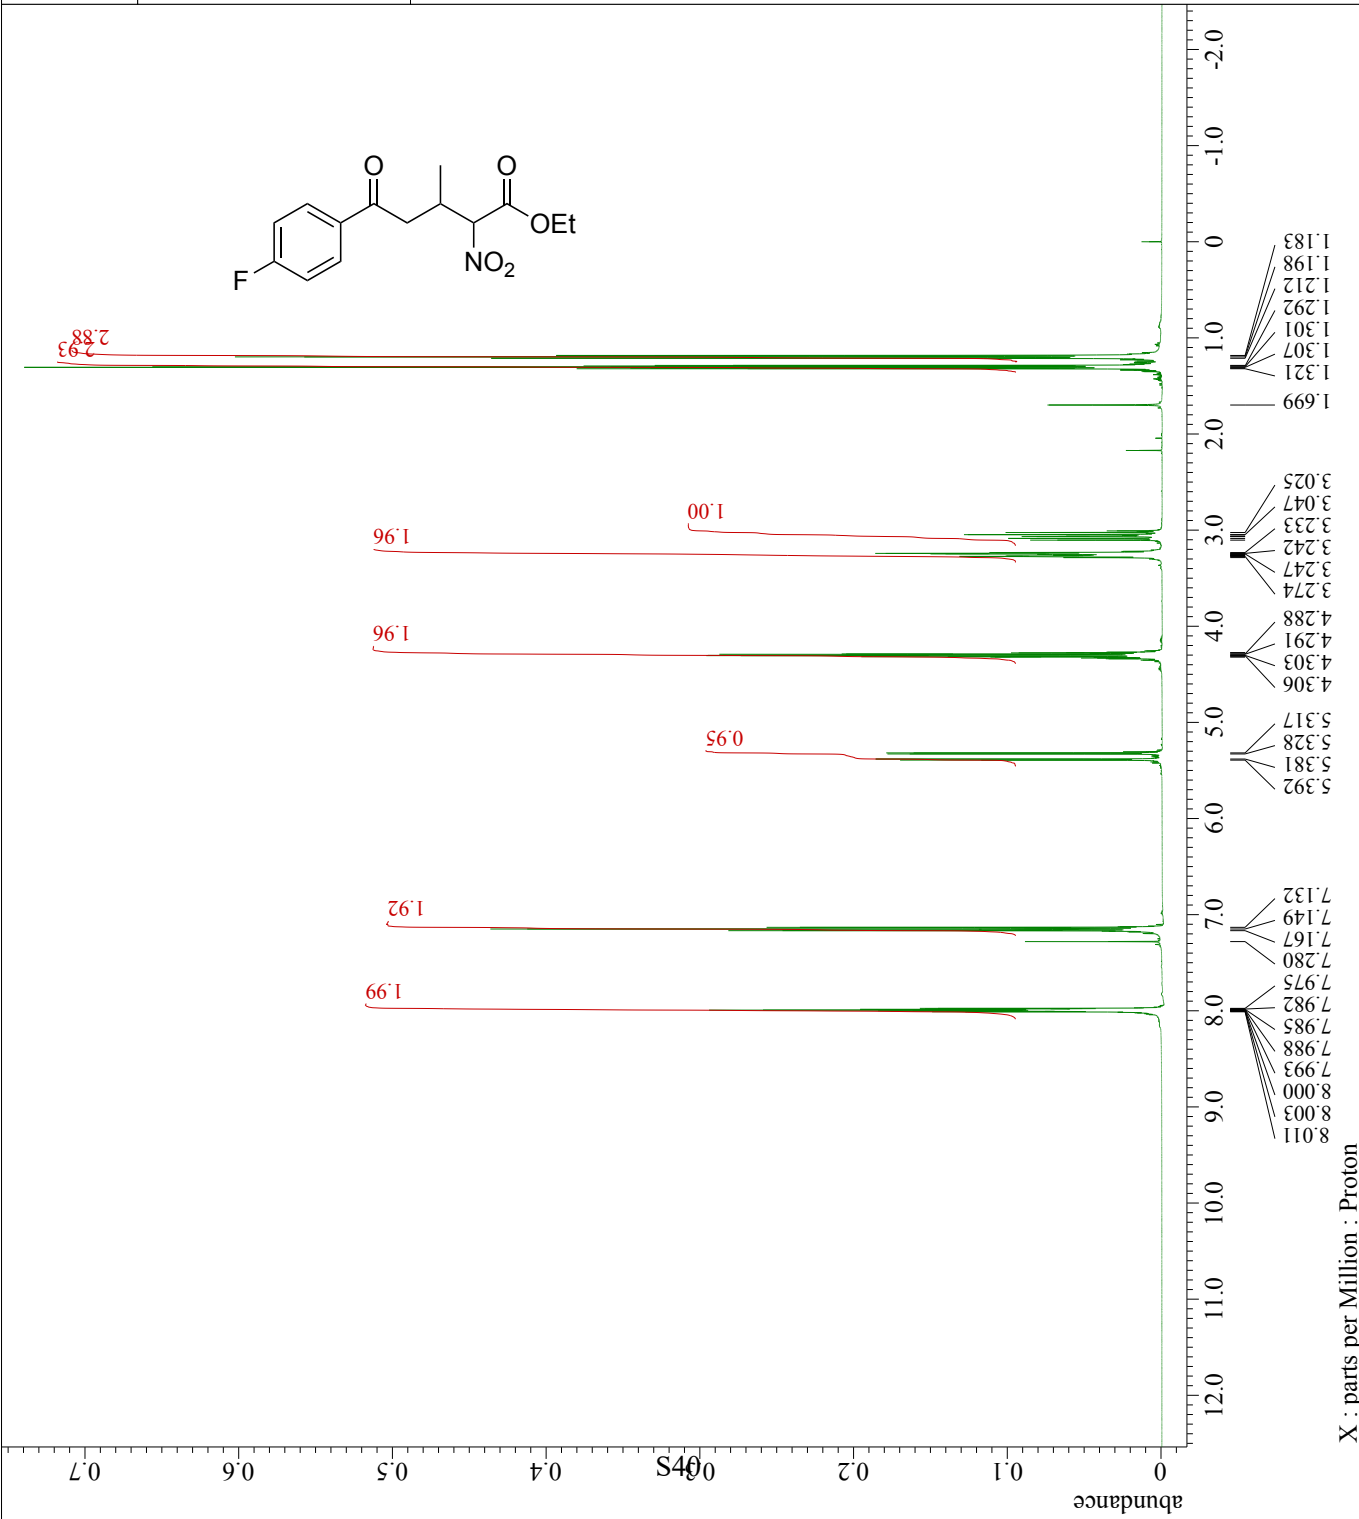



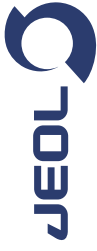

----- PROCESSING PARAMETERS -----

sexp( 1.00646[Hz], 0.0[us] )  
trapezoid( 0[%], 0[%], 80[%], 100[%] )  
zerofill( 2, TRUE )  
fft( 1, TRUE, TRUE )  
machinephase  
ppm  
thresh( 5[%], 1 )  
peak\_pick( 0[Hz], 0.1[ppm], Peaks, 0[Hz] )  
thresh( 3.70024[%], 3.07836[%] )  
reference( 77.13591[ppm], 77[ppm] )

以下に由来 : R00494-purified\_carbon-1-1.jdf

Filename = R00494-purified  
Author = delta  
Experiment = carbon.jxp  
Sample Id = R00494-purified  
Solvent = CHLOROFORM-D  
Actual\_Start\_Time = 25-MAR-2024 16  
Revision\_Time = 15-APR-2024 16  
Data\_Format = 1D COMPLEX  
Dim\_Size = 104858  
X\_Domain = Carbon13  
Dim\_Title = Carbon13  
Dim\_Units = [ppm]  
Dimensions = X  
Site = JNM-ECZ500R/M3  
Spectrometer = JNM-ECZ500R/M3  
Field\_Strength = 11.7473579[T]  
X\_Acq\_Duration = 0.99357984[s]  
X\_Domain = Carbon13  
X\_Freq = 125.76529768 [M]  
X\_Offset = 100 [ppm]  
X\_Points = 39303  
X\_Points\_Input = 31442  
X\_Prescans = 4  
X\_Resolution = 1.00646164 [Hz]  
X\_Sweep = 39.55696203 [kHz]  
X\_Sweep\_Clippped = 31.64556962 [kHz]  
X\_Sweep\_Input = 251.0 [ppm]  
Irr\_Domain = Proton  
Irr\_Freq = 500.15991521 [M]  
Irr\_Offset = 5.0 [ppm]  
Blanking = FALSE  
Clipped = FALSE  
Scans = 148  
Total\_Scans = 148  
Relaxation\_Delay = 2 [s]  
Recvr\_Gain = 52  
Temp\_Get = 22 [dC]  
X\_90\_Width = 12.19 [us]  
X\_Acq\_Time = 0.99357984 [s]  
X\_Angle = 30 [deg]  
X\_Attn = 11.5 [dB]  
X\_Pulse = 32768  
X\_Pulse\_Default = 39557  
X\_Data\_Points = 4.06333333 [us]  
Irr\_Atn\_Dec = 29 [dB]  
Irr\_Atn\_Dec\_Calc = 29 [dB]  
Irr\_Atn\_Noise = 29 [dB]  
Irr\_Bandwidth = 5.97826087 [kHz]  
Irr\_Bandwidth\_Ppm = 11.9526989 [ppm]  
Irr\_Corresp\_Fw90 = 92 [us]

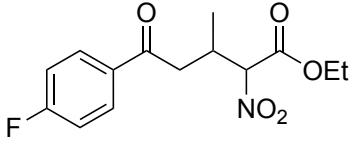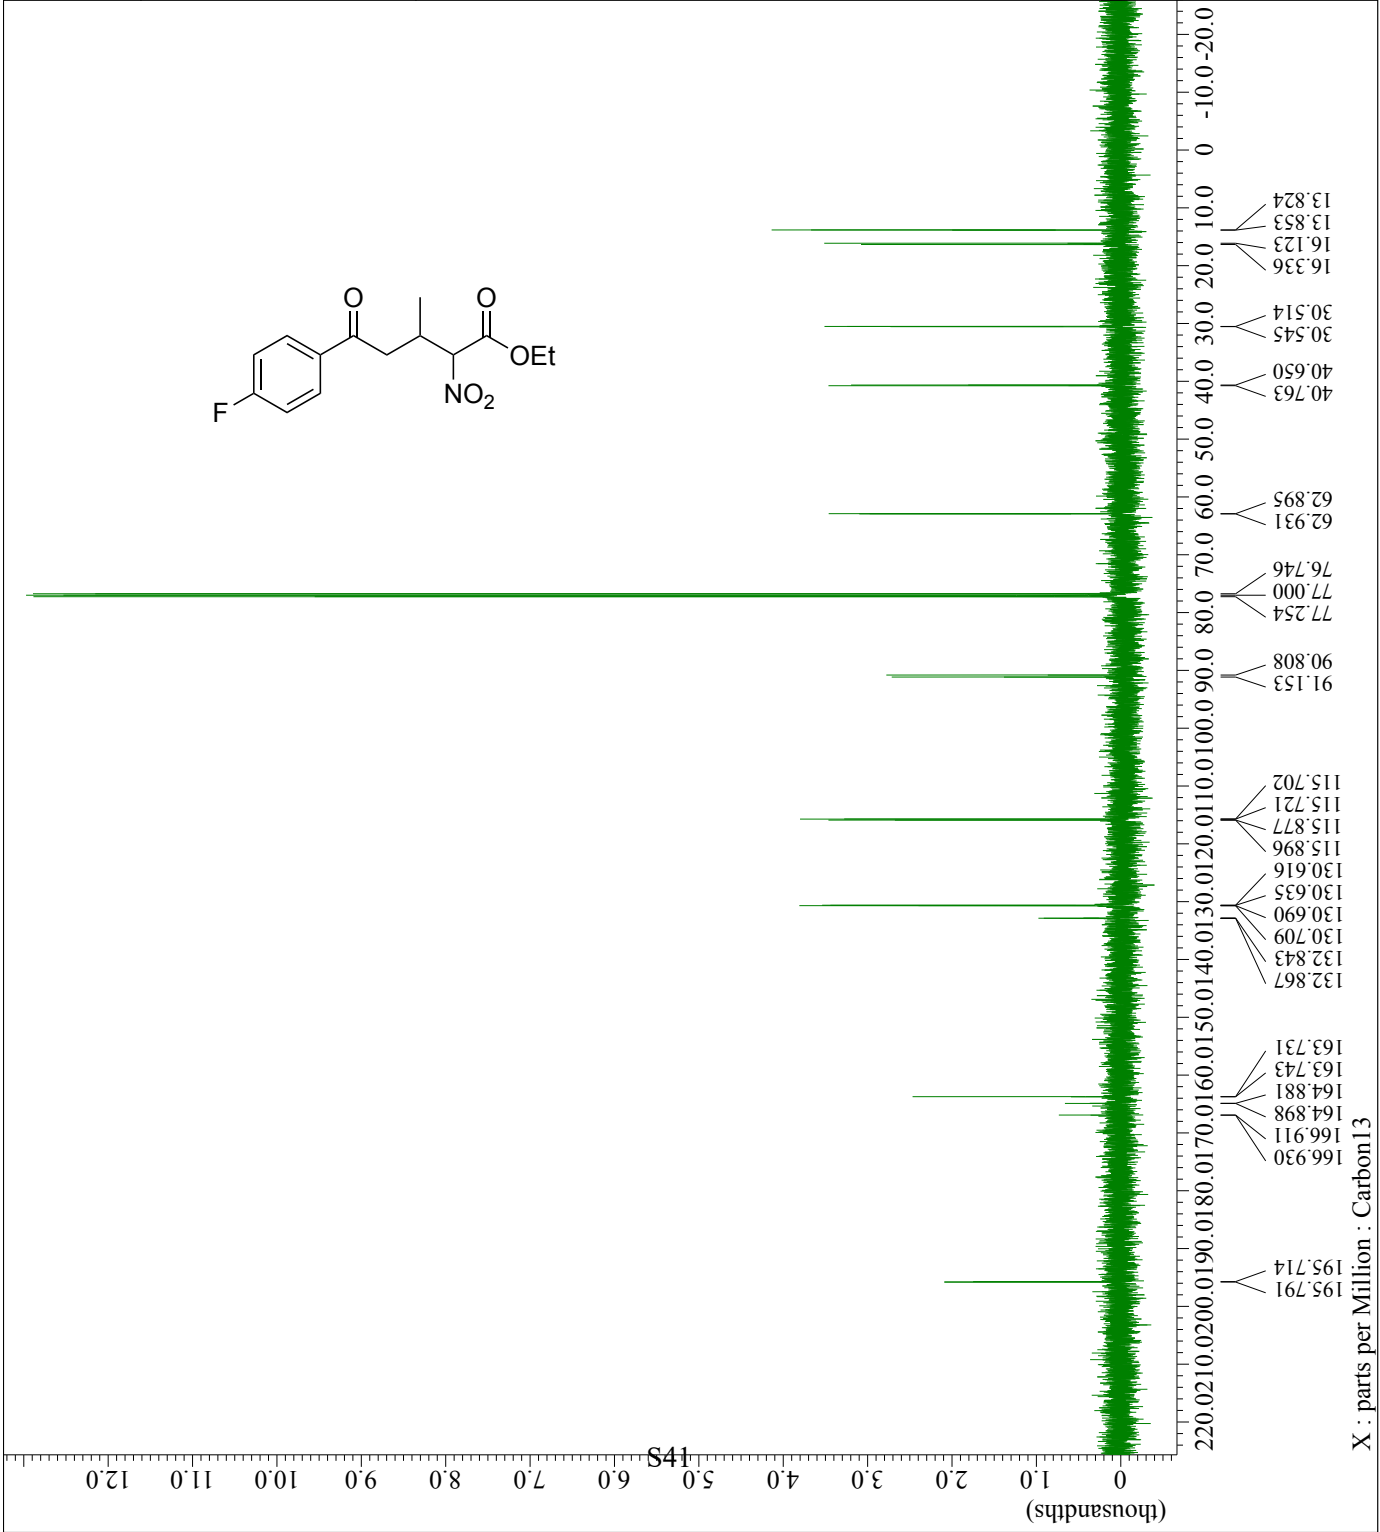

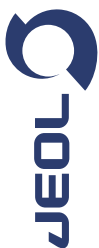

---- PROCESSING PARAMETERS ----  
dc\_balance( 0, FALSE )  
sexp( 0.2[Hz], 0.0[us] )  
trapacid( 0[Hz], 0[Hz], 80[Hz], 100[Hz] )  
zerofill( 1, TRUE )  
fft( 1, TRUE, TRUE )  
machinephase  
ppm  
phase( 1.25, -185, -185, 75.89654[Hz] )  
reference( -62.62748[ppm], -63.72[ppm] )  
reference( -63.72[ppm], -63.72[ppm] )  
thresh( 40.93535[Hz], 1 )

Filename = R00494-purified\_fluorine-  
Author = delta  
Experiment = proton.jxp  
Sample\_Id = R00494-purified  
Solvent = CHLOROFORM-D  
Actual\_Start\_Time = 8-APR-2024 16:40:23  
Revision\_Time = 11-APR-2024 17:28:16  
Comment = single\_pulse  
Data\_Format = 1D COMPLEX  
Dim\_Size = 13107  
X\_Domain = Fluori  
Dim\_Title = Fluorine19  
Dim\_Units = [ppm]  
Dimensions = X  
Site = JNM-ECS400  
Spectrometer = DELTA2\_NMR  
Field\_Strength = 9.389766[T] (400[MHz])  
X\_Acq\_Duration = 86.50752[ms]  
X\_Domain = 19F  
X\_Freq = 376.17105393[MHz]  
X\_Offset = 0[ppm]  
X\_Points = 16384  
X\_Prescans = 1  
X\_Resolution = 11.5596868[Hz]  
X\_Sweep = 189.39393939[kHz]  
X\_Sweep\_Clippped = 151.51515152[kHz]  
Irr\_Domain = Fluorine19  
Irr\_Freq = 376.17105393[MHz]  
Irr\_Offset = 5[ppm]  
Tri\_Domain = Fluorine19  
Tri\_Freq = 376.17105393[MHz]  
Tri\_Offset = 5[ppm]  
Clipped = TRUE  
Scans = 8  
Total\_Scans = 8  
Relaxation\_Delay = 5[s]  
Recvr\_Gain = 50  
Temp\_Get = 25[dc]  
X\_90\_Width = 7.95[us]  
X\_Acq\_Time = 86.50752[ms]  
X\_Angle = 45[deg]  
X\_Atn = 3[db]  
X\_Pulse = 3.975[us]  
Irr\_Mode = Off  
Tri\_Mode = Off  
Dante\_Preset = FALSE  
Initial\_Wait = 1[s]  
Repetition\_Time = 5.08650752[s]

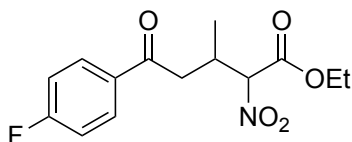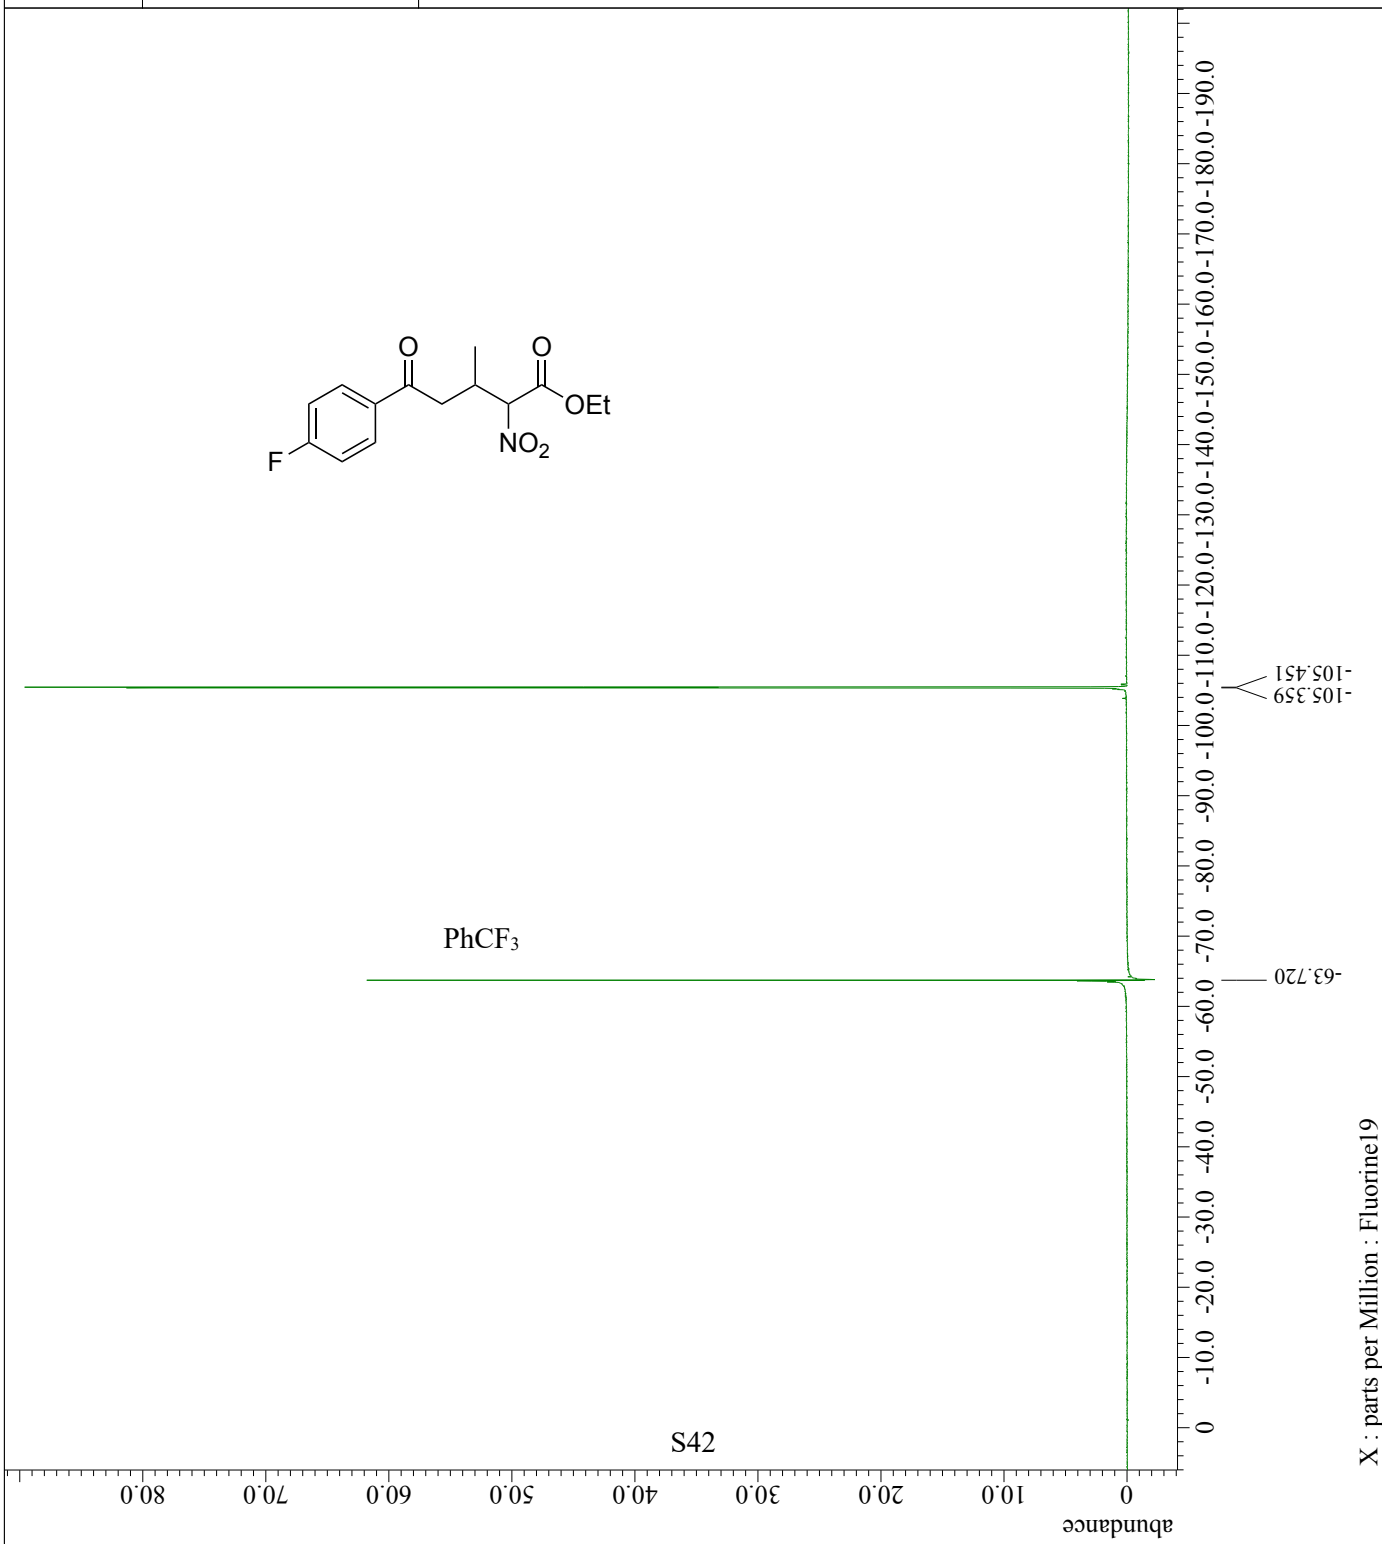

Supplement: d4cc02343a1.pdf [file d4cc02343a1.pdf]
